# Supplementary material
Source: publisher site journal article supplement (https://www.spandidos-publications.com/1856/downloadSupplementary)
Supplement: Supplementary file 1 [file downloadSupplementary]

## Sheet: Table S1
Table SI. Differentially expressed genes between oral squamous cell carcinoma tissues and adjacent normal tissues.
Gene id	MeanTPM (Tumor)	MeanTPM (Normal)	log2FoldChange	pValue	qValue	result	GeneName	GeneDescription	GO	KEGG	KOG
ENSG00000169744	3.76716	12.5717	-1.73863	6.28e-05	0.00289667	down	LDB2	LIM domain binding 2 [Source:HGNC Symbol;Acc:HGNC:6533]	GO:0005886;GO:0006357;GO:0005730;GO:0005634;GO:0000989;GO:0030274;GO:0005515;GO:0031252;GO:0030334;GO:0003712;GO:0043549;GO:0005667;GO:0045944;GO:0044089;GO:0035019;GO:0010669;GO:0001942;GO:0019899	-	KOG2181-LIM domain binding protein LDB1/NLI/CLIM[K]
ENSG00000149798	31.2503	7.911	1.98194	0.000583025	0.0158315	up	CDC42EP2	CDC42 effector protein 2 [Source:HGNC Symbol;Acc:HGNC:16263]	GO:0001515;GO:0005515;GO:0015630;GO:0043547;GO:0005886;GO:0005829;GO:0016020;GO:0005737;GO:0005856;GO:0005096;GO:0012505;GO:0031274;GO:0007266;GO:0008360;GO:0030036;GO:0017049;GO:0007015;GO:0030838;GO:0031334	-	-
ENSG00000184709	0.297061	60.7769	-7.67662	0.00196033	0.0381235	down	LRRC26	leucine rich repeat containing 26 [Source:HGNC Symbol;Acc:HGNC:31409]	GO:0065009;GO:0005886;GO:0006811;GO:0001650;GO:0005730;GO:0016021;GO:0016020;GO:0005737;GO:0006810;GO:0005856;GO:0005515;GO:0070062;GO:0015459;GO:0008076	-	KOG0619-FOG: Leucine rich repeat[R]
ENSG00000162599	17.8892	49.5619	-1.47014	0.000386267	0.0116831	down	NFIA	nuclear factor I A [Source:HGNC Symbol;Acc:HGNC:7784]	GO:0030054;GO:0005622;GO:0006355;GO:0006351;GO:0003700;GO:0003677;GO:0005654;GO:0005634;GO:0006260;GO:0006366;GO:0000978;GO:0000122;GO:0008134;GO:0001077;GO:0045944;GO:0019079;GO:0072189;GO:0060074;GO:0003682	-	KOG3663-Nuclear factor I[K]
ENSG00000198792	59.2201	16.7054	1.82577	0.000229633	0.00795401	up	TMEM184B	transmembrane protein 184B [Source:HGNC Symbol;Acc:HGNC:1310]	GO:0016021;GO:0016020;GO:0005215;GO:0006810	-	KOG2641-Predicted seven transmembrane receptor - rhodopsin family[T]
ENSG00000198795	1.67398	5.38975	-1.68694	0.000357933	0.0110731	down	ZNF521	zinc finger protein 521 [Source:HGNC Symbol;Acc:HGNC:24605]	GO:0048663;GO:0006355;GO:0006351;GO:0003677;GO:0046872;GO:0005634;GO:0003676;GO:0007275;GO:0030154;GO:0019904	-	KOG1721-FOG: Zn-finger[R]
ENSG00000124215	4.40893	13.2811	-1.59087	0.000701707	0.0179155	down	CDH26	cadherin 26 [Source:HGNC Symbol;Acc:HGNC:15902]	GO:0005886;GO:0007156;GO:0007155;GO:0005509;GO:0046872;GO:0016020;GO:0016021	-	-
ENSG00000276203	0.881124	5.93558	-2.75197	0.000205511	0.00727631	down	ANKRD20A3	ankyrin repeat domain 20 family member A3 [Source:HGNC Symbol;Acc:HGNC:31981]	-	-	KOG0504-FOG: Ankyrin repeat[R]
ENSG00000021300	1.51658	15.2353	-3.32852	1.98e-05	0.00115164	down	PLEKHB1	pleckstrin homology domain containing B1 [Source:HGNC Symbol;Acc:HGNC:19079]	GO:0045595;GO:0005515;GO:0016021;GO:0016020;GO:0005737;GO:0007275;GO:0007602;GO:0004871	-	-
ENSG00000158023	42.9411	4.12632	3.37943	9.82e-06	0.00067553	up	WDR66	WD repeat domain 66 [Source:HGNC Symbol;Acc:HGNC:28506]	GO:0001536;GO:0031514;GO:0005737;GO:0005856;GO:0042995;GO:0003341;GO:0005930	-	-
ENSG00000130518	1.79875	6.3877	-1.8283	0.000427595	0.0125853	down	KIAA1683	KIAA1683 [Source:HGNC Symbol;Acc:HGNC:29350]	GO:0005515;GO:0005634;GO:0005739	-	-
ENSG00000196616	0.189349	17.9322	-6.56536	2.91e-17	5.83e-14	down	ADH1B	alcohol dehydrogenase 1B (class I), beta polypeptide [Source:HGNC Symbol;Acc:HGNC:250]	GO:0008270;GO:0005886;GO:0055114;GO:0016491;GO:0005654;GO:0005829;GO:0046872;GO:0005737;GO:0004022;GO:0004024;GO:0006069	K13951-ko00010 Glycolysis / Gluconeogenesis;ko00071 Fatty acid degradation;ko00350 Tyrosine metabolism;ko00830 Retinol metabolism;ko00980 Metabolism of xenobiotics by cytochrome P450;ko00982 Drug metabolism - cytochrome P450;ko05204 Chemical carcinogenesis	KOG0022-Alcohol dehydrogenase, class III[Q]
ENSG00000196611	101.624	2.34783	5.43577	1.54e-08	3.35e-06	up	MMP1	matrix metallopeptidase 1 [Source:HGNC Symbol;Acc:HGNC:7155]	GO:0005576;GO:0006508;GO:0008233;GO:0005509;GO:0016787;GO:0046872;GO:0008270;GO:0005578;GO:0004222;GO:0008237;GO:0031012;GO:0004252;GO:0050900;GO:0044267;GO:0032461;GO:0030574;GO:0016032;GO:0022617;GO:0004175	K01388-ko03320 PPAR signaling pathway;ko05200 Pathways in cancer;ko05219 Bladder cancer;ko05323 Rheumatoid arthritis	KOG1565-Gelatinase A and related matrix metalloproteases[OW]
ENSG00000037280	2.00794	7.12053	-1.82626	1.64e-05	0.00100138	down	FLT4	fms related tyrosine kinase 4 [Source:HGNC Symbol;Acc:HGNC:3767]	GO:0060312;GO:0048514;GO:0048286;GO:0008284;GO:0007585;GO:0003016;GO:0002040;GO:0001946;GO:0001945;GO:0001944;GO:0005021;GO:0004714;GO:0005576;GO:0005515;GO:0005886;GO:0005887;GO:0007169;GO:0004713;GO:0016310;GO:0016301;GO:0016740;GO:0006468;GO:0005524;GO:0000166;GO:0004672;GO:0016020;GO:0016021;GO:0005737;GO:0005634;GO:0038084;GO:0048010;GO:0001934;GO:0043066;GO:0070374;GO:0019903;GO:0046777;GO:…	K05097-ko04014 Ras signaling pathway;ko04015 Rap1 signaling pathway;ko04151 PI3K-Akt signaling pathway;ko04060 Cytokine-cytokine receptor interaction;ko04510 Focal adhesion;ko05224 Breast cancer	KOG0200-Fibroblast/platelet-derived growth factor receptor and related receptor tyrosine kinases[T]
ENSG00000175745	3.12851	9.85022	-1.65468	0.000203564	0.00723871	down	NR2F1	nuclear receptor subfamily 2 group F member 1 [Source:HGNC Symbol;Acc:HGNC:7975]	GO:0045944;GO:0010977;GO:0007399;GO:0044323;GO:0043401;GO:0030522;GO:0004879;GO:0003707;GO:0043565;GO:0003700;GO:0006355;GO:0006351;GO:0003677;GO:0046872;GO:0008270;GO:0005634;GO:0000978;GO:0001078;GO:0000122;GO:0005515;GO:0005654;GO:0003713;GO:0007165;GO:0006367	-	KOG3575-FOG: Hormone receptors[T]
ENSG00000095637	2.21818	8.59898	-1.95479	7.53e-06	0.00055637	down	SORBS1	sorbin and SH3 domain containing 1 [Source:HGNC Symbol;Acc:HGNC:14565]	GO:0005515;GO:0005886;GO:0005813;GO:0005925;GO:0009967;GO:0007015;GO:0016020;GO:0005737;GO:0005634;GO:0006810;GO:0030054;GO:0005856;GO:0045121;GO:0008286;GO:0005829;GO:0005912;GO:0048041;GO:0016363;GO:0003779;GO:0006936;GO:0032869;GO:0090004;GO:0007160;GO:0001725;GO:0005158;GO:0005913;GO:0015758;GO:0045725;GO:0046326;GO:0046889;GO:0005899;GO:0043149;GO:0005070;GO:0008092;GO:0005915;GO:0005924	K06086-ko04520 Adherens junction;ko04910 Insulin signaling pathway;ko03320 PPAR signaling pathway	KOG4225-Sorbin and SH3 domain-containing protein[T]
ENSG00000144681	5.99697	0.451478	3.73151	0.000352234	0.0109424	up	STAC	SH3 and cysteine rich domain [Source:HGNC Symbol;Acc:HGNC:11353]	GO:0030315;GO:1901385;GO:0034605;GO:0006936;GO:0007165;GO:0005515;GO:0005829;GO:0035556;GO:0046872;GO:0005737	-	-
ENSG00000101938	0.597174	13.2198	-4.4684	8.39e-15	9.61e-12	down	CHRDL1	chordin like 1 [Source:HGNC Symbol;Acc:HGNC:29861]	GO:0005576;GO:0007275;GO:0007399;GO:0030154;GO:0044267;GO:0001654;GO:0001503;GO:0030509;GO:0005788;GO:0043687;GO:0048749;GO:0030514	-	-
ENSG00000099985	6.48817	0.533197	3.60507	4.13e-05	0.00206117	up	OSM	oncostatin M [Source:HGNC Symbol;Acc:HGNC:8506]	GO:2001235;GO:0050731;GO:0048266;GO:0045835;GO:0042531;GO:0009408;GO:0007422;GO:0005125;GO:0006955;GO:0005576;GO:0005615;GO:0040008;GO:0008284;GO:0007275;GO:0045944;GO:0008283;GO:0008285;GO:0051781;GO:0008083;GO:0002675;GO:0033138;GO:0043410;GO:0005147;GO:0038165;GO:0046888	K05418-ko04630 Jak-STAT signaling pathway;ko04151 PI3K-Akt signaling pathway;ko04060 Cytokine-cytokine receptor interaction	-
ENSG00000101096	1.71244	6.33494	-1.88728	0.000187749	0.00682818	down	NFATC2	nuclear factor of activated T-cells 2 [Source:HGNC Symbol;Acc:HGNC:7776]	GO:0005515;GO:0003700;GO:0006355;GO:0006351;GO:0003677;GO:0006366;GO:0005654;GO:0005829;GO:0005737;GO:0005634;GO:0006974;GO:0038095;GO:0030890;GO:0050853;GO:0016477;GO:0045893;GO:0042493;GO:0044798;GO:0030529;GO:0005667;GO:0000790;GO:1901741;GO:0045944;GO:0033173;GO:0014904;GO:0010628;GO:0001816;GO:0000122;GO:0044212;GO:0043565;GO:0008134;GO:0003682;GO:0001078;GO:0001077;GO:0000981;GO:0000978;GO:…	K17332-ko04310 Wnt signaling pathway;ko04370 VEGF signaling pathway;ko04022 cGMP - PKG signaling pathway;ko04650 Natural killer cell mediated cytotoxicity;ko04660 T cell receptor signaling pathway;ko04662 B cell receptor signaling pathway;ko04921 Oxytocin signaling pathway;ko04360 Axon guidance;ko04380 Osteoclast differentiation;ko05166 HTLV-I infection;ko05161 Hepatitis B	-
ENSG00000213402	14.1982	48.153	-1.76192	0.000529698	0.0148464	down	PTPRCAP	protein tyrosine phosphatase, receptor type C associated protein [Source:HGNC Symbol;Acc:HGNC:9667]	GO:0016021;GO:0016020;GO:0005886;GO:0006952	-	-
ENSG00000166851	37.6737	10.3709	1.86102	0.000235888	0.00809009	up	PLK1	polo like kinase 1 [Source:HGNC Symbol;Acc:HGNC:9077]	GO:0000795;GO:0000785;GO:0000780;GO:0000776;GO:0070194;GO:0045143;GO:0016321;GO:0006468;GO:0004674;GO:0004672;GO:0005524;GO:0000287;GO:0000278;GO:0005515;GO:0005694;GO:0051301;GO:0016567;GO:0016310;GO:0016301;GO:0016740;GO:0000166;GO:0005737;GO:0005634;GO:0007049;GO:0005856;GO:0008017;GO:0005813;GO:0005815;GO:0005819;GO:0030496;GO:0000775;GO:0000777;GO:0000122;GO:0005829;GO:0031145;GO:0051437;GO:…	K06631-ko04068 FoxO signaling pathway;ko04110 Cell cycle;ko04114 Oocyte meiosis;ko04914 Progesterone-mediated oocyte maturation	KOG0575-Polo-like serine/threonine protein kinase[D]
ENSG00000128849	0.80296	11.4801	-3.83767	9.73e-12	5.58e-09	down	CGNL1	cingulin like 1 [Source:HGNC Symbol;Acc:HGNC:25931]	GO:0016459;GO:0003774;GO:0030054;GO:0005923	-	-
ENSG00000001561	0.792821	5.59751	-2.81972	1.15e-07	1.8e-05	down	ENPP4	ectonucleotide pyrophosphatase/phosphodiesterase 4 (putative) [Source:HGNC Symbol;Acc:HGNC:3359]	GO:0005886;GO:0008152;GO:0003824;GO:0016787;GO:0046872;GO:0016021;GO:0016020;GO:0070062;GO:0043312;GO:0007596;GO:0007599;GO:0101003;GO:0047710;GO:0030194;GO:0046130	K18424-ko00230 Purine metabolism	KOG2645-Type I phosphodiesterase/nucleotide pyrophosphatase[R]
ENSG00000198554	9.7485	2.07142	2.23456	2.12e-05	0.00121215	up	WDHD1	WD repeat and HMG-box DNA binding protein 1 [Source:HGNC Symbol;Acc:HGNC:23170]	GO:0005515;GO:0003677;GO:0005634;GO:0005654;GO:0005737	-	KOG1274-WD40 repeat protein[R]
ENSG00000131459	1.66865	5.33032	-1.67554	0.00198315	0.038443	down	GFPT2	glutamine-fructose-6-phosphate transaminase 2 [Source:HGNC Symbol;Acc:HGNC:4242]	GO:0008483;GO:0005515;GO:0016740;GO:0006541;GO:0097367;GO:1901135;GO:0004360;GO:1901137;GO:0005829;GO:0006002;GO:0006048;GO:0006112	K00820-ko00520 Amino sugar and nucleotide sugar metabolism;ko00250 Alanine, aspartate and glutamate metabolism;ko04931 Insulin resistance	KOG1268-Glucosamine 6-phosphate synthetases, contain amidotransferase and phosphosugar isomerase domains[M]
ENSG00000172167	5.75385	2.14959	1.42047	0.00141603	0.0299056	up	MTBP	MDM2 binding protein [Source:HGNC Symbol;Acc:HGNC:7417]	GO:0007049;GO:0007050;GO:0000785;GO:0000776;GO:0034501;GO:0045839;GO:0008285;GO:0007089	-	-
ENSG00000111641	62.334	19.6853	1.6629	0.000734461	0.0184968	up	NOP2	NOP2 nucleolar protein [Source:HGNC Symbol;Acc:HGNC:7867]	GO:0005515;GO:0008757;GO:0032259;GO:0016740;GO:0008168;GO:0005730;GO:0005634;GO:0003723;GO:0006364;GO:0070475;GO:0005654;GO:0000470;GO:0006357;GO:0008284;GO:0009383	-	KOG1122-tRNA and rRNA cytosine-C5-methylase (nucleolar protein NOL1/NOP2)[A]
ENSG00000168477	4.41516	35.9974	-3.02735	3.38e-06	0.000304551	down	TNXB	tenascin XB [Source:HGNC Symbol;Acc:HGNC:11976]	GO:0005576;GO:0005515;GO:0007155;GO:0005578;GO:0030198;GO:0030199;GO:0008201;GO:0070062;GO:0005622;GO:0031012;GO:0005615;GO:0030036;GO:0005178;GO:0005583;GO:0032963;GO:0048251	-	-
ENSG00000112699	13.4882	68.4456	-2.34326	1.85e-09	5.71e-07	down	GMDS	GDP-mannose 4,6-dehydratase [Source:HGNC Symbol;Acc:HGNC:4369]	GO:0005515;GO:0016829;GO:0005737;GO:0007219;GO:0042802;GO:0005829;GO:0070062;GO:0008446;GO:0070401;GO:0019673;GO:0042351	K01711-ko00051 Fructose and mannose metabolism;ko00520 Amino sugar and nucleotide sugar metabolism	KOG1372-GDP-mannose 4,6 dehydratase[G]
ENSG00000074527	7.11654	22.3202	-1.6491	0.00107933	0.0247015	down	NTN4	netrin 4 [Source:HGNC Symbol;Acc:HGNC:13658]	GO:0005604;GO:0060668;GO:0016322;GO:0043237;GO:0005576;GO:0005515;GO:0005578;GO:0005886;GO:0007411	K06845-ko04360 Axon guidance	KOG0994-Extracellular matrix glycoprotein Laminin subunit beta[W]
ENSG00000258616	0.303239	7.12384	-4.55413	3e-05	0.001604	down	LINC02303	long intergenic non-protein coding RNA 2303 [Source:HGNC Symbol;Acc:HGNC:53222]	-	-	-
ENSG00000154262	0.987725	7.44449	-2.91399	9.25e-09	2.12e-06	down	ABCA6	ATP binding cassette subfamily A member 6 [Source:HGNC Symbol;Acc:HGNC:36]	GO:0055085;GO:0005654;GO:0005524;GO:0000166;GO:0005215;GO:0006810;GO:0016021;GO:0016020;GO:0016887;GO:0042626;GO:0043231;GO:0006869	K05649-ko02010 ABC transporters	KOG0059-Lipid exporter ABCA1 and related proteins, ABC superfamily[IR]
ENSG00000154263	0.952333	5.80671	-2.60818	1.04e-05	0.00069798	down	ABCA10	ATP binding cassette subfamily A member 10 [Source:HGNC Symbol;Acc:HGNC:30]	GO:0005215;GO:0006810;GO:0016021;GO:0055085;GO:0005524;GO:0000166;GO:0016020;GO:0016887;GO:0042626;GO:0043231;GO:0006869	K05652-ko02010 ABC transporters	KOG0059-Lipid exporter ABCA1 and related proteins, ABC superfamily[IR]
ENSG00000164035	3.20595	12.9935	-2.01897	2.44e-07	3.52e-05	down	EMCN	endomucin [Source:HGNC Symbol;Acc:HGNC:16041]	GO:0005576;GO:0005886;GO:0016021;GO:0016020;GO:0009897;GO:0001525;GO:0030246;GO:0016337;GO:0030155	-	-
ENSG00000109794	1.15347	5.44917	-2.24005	0.000178493	0.00662158	down	FAM149A	family with sequence similarity 149 member A [Source:HGNC Symbol;Acc:HGNC:24527]	-	-	-
ENSG00000101443	102.292	1570.16	-3.94014	2.92e-05	0.00157047	down	WFDC2	WAP four-disulfide core domain 2 [Source:HGNC Symbol;Acc:HGNC:15939]	GO:0005576;GO:0010951;GO:0004869;GO:0030414;GO:0010466;GO:0070062;GO:0004867;GO:0005615;GO:0007283;GO:0004866;GO:0006508;GO:0019828	-	-
ENSG00000101445	2.61327	7.56622	-1.53372	0.000890873	0.0215564	down	PPP1R16B	protein phosphatase 1 regulatory subunit 16B [Source:HGNC Symbol;Acc:HGNC:15850]	GO:0061028;GO:0035304;GO:0005515;GO:0050790;GO:0005886;GO:0016020;GO:0016607;GO:0005634;GO:0048471;GO:0019888;GO:0035308;GO:0001938;GO:0051489;GO:0042995;GO:0014066;GO:0035307;GO:1902309;GO:1903589	-	KOG0505-Myosin phosphatase, regulatory subunit[OT]
ENSG00000123500	7.7412	0.592521	3.70762	4.07e-05	0.0020382	up	COL10A1	collagen type X alpha 1 chain [Source:HGNC Symbol;Acc:HGNC:2185]	GO:0005938;GO:0005581;GO:0005578;GO:0051216;GO:0001958;GO:0005576;GO:0005515;GO:0046872;GO:0030574;GO:0001501;GO:0030198;GO:0005788	K19479-ko04974 Protein digestion and absorption	-
ENSG00000065717	3.48032	25.5962	-2.87863	7.03e-09	1.73e-06	down	TLE2	transducin like enhancer of split 2 [Source:HGNC Symbol;Acc:HGNC:11838]	GO:0016604;GO:0005515;GO:0005925;GO:0006355;GO:0006351;GO:0005634;GO:0016055;GO:0005615;GO:0003714;GO:0090090;GO:0005654;GO:0007165;GO:0045892;GO:1904837;GO:0009887	-	KOG0639-Transducin-like enhancer of split protein (contains WD40 repeats)[B]
ENSG00000051180	9.38869	2.7009	1.79749	0.000787203	0.0194586	up	RAD51	RAD51 recombinase [Source:HGNC Symbol;Acc:HGNC:9817]	GO:0005634;GO:0000800;GO:0000794;GO:0000793;GO:0000784;GO:1990414;GO:1904631;GO:0072719;GO:0072711;GO:0071480;GO:0071312;GO:0070192;GO:0051321;GO:0042493;GO:0032200;GO:0031297;GO:0014070;GO:0010833;GO:0010165;GO:0009636;GO:0007127;GO:0001932;GO:0000724;GO:0000722;GO:0003697;GO:0003682;GO:0005515;GO:0006281;GO:0005739;GO:0003677;GO:0006259;GO:0008094;GO:0005829;GO:0005730;GO:0005524;GO:0000166;GO:…	K04482-ko03440 Homologous recombination;ko03460 Fanconi anemia pathway;ko05200 Pathways in cancer;ko05212 Pancreatic cancer	KOG1433-DNA repair protein RAD51/RHP55[L]
ENSG00000205436	6.17598	0.857992	2.84763	0.00138297	0.0295706	up	EXOC3L4	exocyst complex component 3 like 4 [Source:HGNC Symbol;Acc:HGNC:20120]	GO:0000145;GO:0006887;GO:0000149;GO:0051601	-	KOG2286-Exocyst complex subunit SEC6[U]
ENSG00000162078	12.3466	1318.94	-6.73912	1.17e-10	5.2e-08	down	ZG16B	zymogen granule protein 16B [Source:HGNC Symbol;Acc:HGNC:30456]	GO:0005576;GO:0030246;GO:0005615;GO:0003674;GO:0070062;GO:0001895	-	-
ENSG00000111215	6.21489	12452.6	-10.9684	8.94e-28	1.08e-23	down	PRR4	proline rich 4 (lacrimal) [Source:HGNC Symbol;Acc:HGNC:18020]	GO:0005576;GO:0005615;GO:0001895;GO:0007601	-	-
ENSG00000109610	13.1722	96.5287	-2.87347	1.41e-05	0.000885863	down	SOD3	superoxide dismutase 3 [Source:HGNC Symbol;Acc:HGNC:11181]	GO:0031012;GO:0005737;GO:0005634;GO:0005615;GO:0046688;GO:0001666;GO:0006979;GO:0004784;GO:0034599;GO:0005576;GO:0005515;GO:0046872;GO:0055114;GO:0016491;GO:0006801;GO:0019430;GO:0005507;GO:0008201;GO:0070062;GO:0005796;GO:0008270;GO:0016209	-	KOG0441-Cu2+/Zn2+ superoxide dismutase SOD1[P]
ENSG00000240224	0.481761	19.9758	-5.37379	8.56e-09	2e-06	down	UGT1A5	UDP glucuronosyltransferase family 1 member A5 [Source:HGNC Symbol;Acc:HGNC:12537]	GO:0016758;GO:0008152;GO:0016757;GO:0016740;GO:0016021;GO:0016020;GO:0015020;GO:0052697	K00699-ko00040 Pentose and glucuronate interconversions;ko00053 Ascorbate and aldarate metabolism;ko00500 Starch and sucrose metabolism;ko00140 Steroid hormone biosynthesis;ko00830 Retinol metabolism;ko00860 Porphyrin and chlorophyll metabolism;ko00980 Metabolism of xenobiotics by cytochrome P450;ko00982 Drug metabolism - cytochrome P450;ko00983 Drug metabolism - other enzymes;ko05204 Chemical ca…	KOG1192-UDP-glucuronosyl and UDP-glucosyl transferase[GC]
ENSG00000214456	1.51712	7.94842	-2.38933	0.001271	0.0279203	down	PLIN5	perilipin 5 [Source:HGNC Symbol;Acc:HGNC:33196]	GO:0005829;GO:0005811;GO:0005739;GO:0005737;GO:2000378;GO:0060193;GO:0060192;GO:0051646;GO:0050995;GO:0035359;GO:0034389;GO:0032000;GO:0031999;GO:0019915;GO:0010897;GO:0010890;GO:0010884;GO:0010867;GO:0042802;GO:0035473	K20255-ko03320 PPAR signaling pathway	-
ENSG00000131831	3.71322	12.6137	-1.76425	0.000588978	0.0159328	down	RAI2	retinoic acid induced 2 [Source:HGNC Symbol;Acc:HGNC:9835]	GO:0005515;GO:0003674;GO:0005575;GO:0009790	-	-
ENSG00000104738	86.4389	24.3886	1.82547	0.000764799	0.0190614	up	MCM4	minichromosome maintenance complex component 4 [Source:HGNC Symbol;Acc:HGNC:6947]	GO:0006270;GO:0005515;GO:0003677;GO:0004386;GO:0016787;GO:0005654;GO:0005524;GO:0000166;GO:0016020;GO:0005634;GO:0007049;GO:0006260;GO:0003678;GO:0042555;GO:0000784;GO:0004003;GO:0000082;GO:0006268;GO:0003697	K02212-ko03030 DNA replication;ko04110 Cell cycle;ko04111 Cell cycle - yeast;ko04113 Meiosis - yeast	KOG0478-DNA replication licensing factor, MCM4 component[L]
ENSG00000143196	6.2479	51.5102	-3.04341	0.000229938	0.00795401	down	DPT	dermatopontin [Source:HGNC Symbol;Acc:HGNC:3011]	GO:0005615;GO:0030199;GO:0008285;GO:0005576;GO:0007155;GO:0005578;GO:0070062;GO:0031012	-	-
ENSG00000050628	1.40167	5.39667	-1.94492	0.00102996	0.0238936	down	PTGER3	prostaglandin E receptor 3 [Source:HGNC Symbol;Acc:HGNC:9595]	GO:0007165;GO:0004871;GO:0005886;GO:0007186;GO:0004930;GO:0016021;GO:0016020;GO:0004955;GO:0004957;GO:0005887;GO:0005635;GO:0007200;GO:0031622;GO:0008219;GO:0014827;GO:0060455;GO:0008150	K04260-ko04020 Calcium signaling pathway;ko04024 cAMP signaling pathway;ko04080 Neuroactive ligand-receptor interaction;ko04923 Regulation of lipolysis in adipocyte;ko05200 Pathways in cancer	KOG3656-FOG: 7 transmembrane receptor[R]
ENSG00000011332	5.77392	0.80141	2.84894	8.73e-05	0.0036861	up	DPF1	double PHD fingers 1 [Source:HGNC Symbol;Acc:HGNC:20225]	GO:0006355;GO:0006351;GO:0046872;GO:0008270;GO:0005737;GO:0005634;GO:0007399;GO:0006915;GO:0071565;GO:0003676	-	KOG1244-Predicted transcription factor Requiem/NEURO-D4[K]
ENSG00000196155	12.7292	4.185	1.60485	0.00153241	0.031669	up	PLEKHG4	pleckstrin homology and RhoGEF domain containing G4 [Source:HGNC Symbol;Acc:HGNC:24501]	GO:0005515;GO:0035023;GO:0005089;GO:0005085;GO:0090630	-	KOG0689-Guanine nucleotide exchange factor for Rho and Rac GTPases[T]
ENSG00000170619	37.3512	9.28796	2.00772	0.00070346	0.0179412	up	COMMD5	COMM domain containing 5 [Source:HGNC Symbol;Acc:HGNC:17902]	GO:0005515;GO:0006355;GO:0006351;GO:0005654;GO:0005829;GO:0005737;GO:0005634	-	-
ENSG00000096006	2.21001	220.435	-6.64016	1.85e-22	7.44e-19	down	CRISP3	cysteine rich secretory protein 3 [Source:HGNC Symbol;Acc:HGNC:16904]	GO:0005576;GO:0005578;GO:0005615;GO:0045087;GO:0006952;GO:0003674;GO:0070062;GO:0043312;GO:0042581;GO:0035580;GO:1904724;GO:0016021;GO:0016020	-	-
ENSG00000134884	31.2788	75.5376	-1.27201	0.0025487	0.0460333	down	ARGLU1	arginine and glutamate rich 1 [Source:HGNC Symbol;Acc:HGNC:25482]	GO:0005515;GO:0006355;GO:0006351;GO:0005739;GO:0005654;GO:0005634;GO:0045296	-	-
ENSG00000162769	8.78551	2.83164	1.63349	0.0015675	0.0322264	up	FLVCR1	feline leukemia virus subgroup C cellular receptor 1 [Source:HGNC Symbol;Acc:HGNC:24682]	GO:0060323;GO:0048704;GO:0048536;GO:0046620;GO:0042733;GO:0035264;GO:0035108;GO:0030218;GO:0001701;GO:0001568;GO:0005886;GO:0005739;GO:0055085;GO:0016021;GO:0016020;GO:0006810;GO:0031966;GO:0005515;GO:0005887;GO:0043249;GO:0005215;GO:0007275;GO:0015232;GO:0006879;GO:0015886;GO:0006839;GO:0097037	-	KOG2563-Permease of the major facilitator superfamily[R]
ENSG00000043039	10.066	71.7857	-2.8342	0.000104441	0.0042837	down	BARX2	BARX homeobox 2 [Source:HGNC Symbol;Acc:HGNC:956]	GO:0005667;GO:0045944;GO:0014902;GO:0001502;GO:0000122;GO:0043565;GO:0003700;GO:0003682;GO:0003677;GO:0006355;GO:0006351;GO:0006366;GO:0005654;GO:0005829;GO:0005634;GO:0001228;GO:0000977	-	KOG0488-Transcription factor BarH and related HOX domain proteins[R]
ENSG00000211637	93.7713	12.1215	2.95157	0.00215106	0.0409722	up	IGLV4-69	immunoglobulin lambda variable 4-69 [Source:HGNC Symbol;Acc:HGNC:5921]	GO:0005576;GO:0005886;GO:0016020;GO:0002376;GO:0002377;GO:0006955;GO:0005615;GO:0003823;GO:0002250	-	-
ENSG00000134690	22.4004	6.46159	1.79357	0.00221758	0.0417515	up	CDCA8	cell division cycle associated 8 [Source:HGNC Symbol;Acc:HGNC:14629]	GO:0010369;GO:0016604;GO:0005515;GO:0045171;GO:0005694;GO:0051301;GO:0005730;GO:0005634;GO:0005737;GO:0007049;GO:0005856;GO:0005819;GO:0000775;GO:0005829;GO:0005654;GO:0007062;GO:0043234;GO:0051233;GO:0016925;GO:0032133;GO:0007080;GO:0051276;GO:0030496	-	-
ENSG00000168743	23.155	3.12452	2.88962	0.000128695	0.00508779	up	NPNT	nephronectin [Source:HGNC Symbol;Acc:HGNC:27405]	GO:0005576;GO:0007155;GO:0005509;GO:0016020;GO:0007275;GO:0005578;GO:0030154;GO:0070062;GO:0045669;GO:0070374;GO:0001657;GO:0001658;GO:0010811;GO:0007160;GO:0005178;GO:0071356;GO:0033631;GO:0030198;GO:0034678;GO:0031012;GO:0030485;GO:0005615;GO:0005604;GO:2000721;GO:0097195;GO:0045987;GO:0045184;GO:0030511;GO:0010694	-	-
ENSG00000105929	2.01411	13.5071	-2.7455	0.000448231	0.0130649	down	ATP6V0A4	ATPase H+ transporting V0 subunit a4 [Source:HGNC Symbol;Acc:HGNC:866]	GO:0005886;GO:0006811;GO:0005765;GO:0016021;GO:0016020;GO:0006810;GO:0015078;GO:0015991;GO:0015992;GO:0000220;GO:0033179;GO:0005515;GO:0005768;GO:0070062;GO:0034220;GO:0010008;GO:0030670;GO:0016324;GO:0008286;GO:0033572;GO:0090383;GO:0045177;GO:0051117;GO:0007605;GO:0015986;GO:0001503;GO:0006885;GO:0007588;GO:0016471;GO:0046961;GO:0007035;GO:0070072;GO:0031526;GO:0005903	K02154-ko00190 Oxidative phosphorylation;ko04145 Phagosome;ko04142 Lysosome;ko04966 Collecting duct acid secretion;ko04721 Synaptic vesicle cycle;ko05323 Rheumatoid arthritis;ko05110 Vibrio cholerae infection;ko05120 Epithelial cell signaling in Helicobacter pylori infection;ko05152 Tuberculosis	KOG2189-Vacuolar H+-ATPase V0 sector, subunit a[C]
ENSG00000148848	9.76432	1.19613	3.02915	0.000836959	0.0204783	up	ADAM12	ADAM metallopeptidase domain 12 [Source:HGNC Symbol;Acc:HGNC:190]	GO:0005615;GO:0005576;GO:0006508;GO:0008233;GO:0005886;GO:0007155;GO:0016787;GO:0005654;GO:0046872;GO:0016021;GO:0016020;GO:0004222;GO:0008237;GO:0017124;GO:0030198;GO:0007520	-	KOG3607-Meltrins, fertilins and related Zn-dependent metalloproteinases of the ADAMs family[O]
ENSG00000185633	81.3208	22.3452	1.86366	0.00252086	0.0456812	up	NDUFA4L2	NDUFA4, mitochondrial complex associated like 2 [Source:HGNC Symbol;Acc:HGNC:29836]	GO:1902600;GO:0016021;GO:0016020;GO:0005751;GO:0004129	K03948-ko00190 Oxidative phosphorylation;ko05010 Alzheimer's disease;ko05012 Parkinson's disease;ko05016 Huntington's disease;ko04932 Non-alcoholic fatty liver disease (NAFLD)	-
ENSG00000165072	0.769507	12.6517	-4.03926	8.41e-08	1.45e-05	down	MAMDC2	MAM domain containing 2 [Source:HGNC Symbol;Acc:HGNC:23673]	GO:0005576;GO:0016020;GO:0005578;GO:0005783	-	-
ENSG00000100401	100.812	31.6657	1.67067	0.000551544	0.0152457	up	RANGAP1	Ran GTPase activating protein 1 [Source:HGNC Symbol;Acc:HGNC:9854]	GO:0005096;GO:0016235;GO:0005515;GO:0043547;GO:0005694;GO:0007165;GO:0031965;GO:0005829;GO:0043231;GO:0016020;GO:0005737;GO:0005634;GO:0005856;GO:0000922;GO:0000775;GO:0000776;GO:0000777;GO:0045296;GO:0007062;GO:0005643;GO:0005635;GO:0016925;GO:0046826;GO:1990723;GO:1904115;GO:0072686;GO:0048471;GO:0044614;GO:0030425;GO:1904117;GO:0048678;GO:0071375;GO:0031625;GO:0008536	K14319-ko03013 RNA transport	KOG1909-Ran GTPase-activating protein[AYT]
ENSG00000196805	127.246	8.80635	3.85293	0.00120453	0.026877	up	SPRR2B	small proline rich protein 2B [Source:HGNC Symbol;Acc:HGNC:11262]	GO:0005737;GO:0031424;GO:0005829;GO:0001533;GO:0005198;GO:0008544;GO:0018149;GO:0030216;GO:0070268	-	-
ENSG00000142599	17.1895	36.7085	-1.09459	0.000674285	0.0175511	down	RERE	arginine-glutamic acid dipeptide repeats [Source:HGNC Symbol;Acc:HGNC:9965]	GO:0000118;GO:0005634;GO:0048813;GO:0048755;GO:0021942;GO:0021930;GO:0021691;GO:0021549;GO:0006338;GO:0001106;GO:0001105;GO:0005515;GO:0043565;GO:0006355;GO:0006351;GO:0003700;GO:0003677;GO:0006366;GO:0046872;GO:0008270;GO:0007275;GO:0045944;GO:0003682;GO:0000122;GO:1903507;GO:0006607;GO:0008267	K05628-ko04391 Hippo signaling pathway -fly	KOG2133-Transcriptional corepressor Atrophin-1/DRPLA[R]
ENSG00000260691	1.19929	5.8251	-2.2801	0.00194297	0.0379492	down	ANKRD20A1	ankyrin repeat domain 20 family member A1 [Source:HGNC Symbol;Acc:HGNC:23665]	GO:0005886	-	KOG0504-FOG: Ankyrin repeat[R]
ENSG00000182197	26.5934	8.39173	1.66403	0.00141904	0.0299167	up	EXT1	exostosin glycosyltransferase 1 [Source:HGNC Symbol;Acc:HGNC:3512]	GO:0030176;GO:0072498;GO:0021772;GO:0015012;GO:0007498;GO:0007492;GO:0007420;GO:0007411;GO:0007369;GO:0050509;GO:0050508;GO:0005783;GO:0005794;GO:0016757;GO:0005789;GO:0016740;GO:0046872;GO:0016021;GO:0016020;GO:0000139;GO:0006486;GO:0006024;GO:0015020;GO:0042803;GO:0046982;GO:0007165;GO:0001501;GO:0001503;GO:0008375;GO:0042328;GO:0015014;GO:0033692	K02366-ko00534 Glycosaminoglycan biosynthesis - heparan sulfate / heparin	KOG1021-Acetylglucosaminyltransferase EXT1/exostosin 1[GMW]
ENSG00000007216	0.517874	13.2014	-4.67195	6.67e-06	0.000518021	down	SLC13A2	solute carrier family 13 member 2 [Source:HGNC Symbol;Acc:HGNC:10917]	GO:0006814;GO:0016020;GO:0055085;GO:0005215;GO:0016021;GO:0006811;GO:0015293;GO:0006810;GO:0005886;GO:0070062;GO:0098656;GO:0005887;GO:0015361;GO:0006835	-	-
ENSG00000165215	5.31764	32.0229	-2.59025	0.00218406	0.0413067	down	CLDN3	claudin 3 [Source:HGNC Symbol;Acc:HGNC:2045]	GO:0016328;GO:0016327;GO:0005923;GO:0005737;GO:0045471;GO:0016338;GO:0003382;GO:0042802;GO:0005886;GO:0005198;GO:0016021;GO:0016020;GO:0030054;GO:0007165;GO:0070062;GO:0051291;GO:0001666;GO:0005887;GO:0004888;GO:0051260;GO:0070830	K06087-ko04514 Cell adhesion molecules (CAMs);ko04530 Tight junction;ko04670 Leukocyte transendothelial migration;ko05160 Hepatitis C	-
ENSG00000126709	1253.71	127.168	3.30139	0.000595777	0.0160806	up	IFI6	interferon alpha inducible protein 6 [Source:HGNC Symbol;Acc:HGNC:4054]	GO:0016021;GO:0016020;GO:0005886;GO:0005515;GO:0006955;GO:0005739;GO:2001240;GO:0060337;GO:0001836;GO:0043154;GO:0051902	-	-
ENSG00000104524	26.9469	6.8444	1.97712	0.0010982	0.0250144	up	PYCR3	pyrroline-5-carboxylate reductase 3 [Source:HGNC Symbol;Acc:HGNC:25846]	GO:0042802;GO:0008652;GO:0055114;GO:0016491;GO:0004735;GO:0006561;GO:0055129;GO:0005515;GO:0005829;GO:0005737	K00286-ko01230 Biosynthesis of amino acids;ko00330 Arginine and proline metabolism	KOG3124-Pyrroline-5-carboxylate reductase[E]
ENSG00000143995	10.6293	24.6817	-1.2154	0.0010626	0.0245049	down	MEIS1	Meis homeobox 1 [Source:HGNC Symbol;Acc:HGNC:7000]	GO:0003677;GO:0006355;GO:0005634;GO:0005667;GO:0060216;GO:0048514;GO:0045944;GO:0045665;GO:0045638;GO:0035855;GO:0030097;GO:0007626;GO:0002089;GO:0001525;GO:0046982;GO:0043565;GO:0003705;GO:0003682;GO:0001077;GO:0000978;GO:0005515;GO:0006351;GO:0006366;GO:0007275	K15613-ko04550 Signaling pathways regulating pluripotency of stem cells;ko05202 Transcriptional misregulation in cancers	KOG0773-Transcription factor MEIS1 and related HOX domain proteins[K]
ENSG00000169469	1836.66	285.834	2.68384	0.00252086	0.0456812	up	SPRR1B	small proline rich protein 1B [Source:HGNC Symbol;Acc:HGNC:11260]	GO:0005737;GO:0018149;GO:0031424;GO:0005829;GO:0070062;GO:0030674;GO:0005198;GO:0030216;GO:0008544;GO:0070268;GO:0001533	-	-
ENSG00000107201	34.5864	5.29915	2.70637	0.000123851	0.0049337	up	DDX58	DExD/H-box helicase 58 [Source:HGNC Symbol;Acc:HGNC:19102]	GO:0008270;GO:0005829;GO:0005524;GO:0046872;GO:0003676;GO:0045087;GO:0043330;GO:0032728;GO:0009615;GO:0003727;GO:0003725;GO:0003690;GO:0005515;GO:0005886;GO:0004386;GO:0016787;GO:0000166;GO:0016020;GO:0005737;GO:0003723;GO:0030054;GO:0005856;GO:0002376;GO:0042995;GO:0042802;GO:0051607;GO:0005923;GO:0016579;GO:0031625;GO:0016032;GO:0030334;GO:0045944;GO:0010628;GO:0051091;GO:0002230;GO:0015629;GO:…	K12646-ko04064 NF-kappa B signaling pathway;ko04622 RIG-I-like receptor signaling pathway;ko04623 Cytosolic DNA-sensing pathway;ko05162 Measles;ko05164 Influenza A;ko05161 Hepatitis B;ko05160 Hepatitis C;ko05168 Herpes simplex infection;ko05169 Epstein-Barr virus infection	KOG0354-DEAD-box like helicase[R]
ENSG00000223812	6.07453	0.133026	5.51299	0.000358741	0.0110731	up	AC125608.1	-	-	-	-
ENSG00000123427	2.17623	7.33439	-1.75285	0.000692158	0.0177992	down	EEF1AKMT3	EEF1A lysine methyltransferase 3 [Source:HGNC Symbol;Acc:HGNC:24936]	GO:0032259;GO:0016740;GO:0008168;GO:0005737;GO:0005856;GO:0016279;GO:0018022;GO:0005813;GO:0005815;GO:0005622	-	-
ENSG00000163597	59.2232	14.9653	1.98455	0.000706186	0.0179727	up	SNHG16	small nucleolar RNA host gene 16 [Source:HGNC Symbol;Acc:HGNC:44352]	-	-	-
ENSG00000058085	187.083	15.3499	3.60738	2.62e-06	0.000252277	up	LAMC2	laminin subunit gamma 2 [Source:HGNC Symbol;Acc:HGNC:6493]	GO:0005576;GO:0007155;GO:0005578;GO:0005604;GO:0008201;GO:0008284;GO:0030335;GO:0030198;GO:0022617;GO:0008544;GO:0031581;GO:0048731;GO:0070831;GO:0048471;GO:0016020;GO:0005938;GO:0005615;GO:0005607	K06246-ko04151 PI3K-Akt signaling pathway;ko04512 ECM-receptor interaction;ko04510 Focal adhesion;ko05200 Pathways in cancer;ko05222 Small cell lung cancer;ko05146 Amoebiasis;ko05145 Toxoplasmosis	-
ENSG00000154319	9.71436	1.13189	3.10138	0.00013519	0.00528384	up	FAM167A	family with sequence similarity 167 member A [Source:HGNC Symbol;Acc:HGNC:15549]	GO:0005515;GO:0005783	-	-
ENSG00000090530	63.8587	5.27837	3.59672	9.62e-06	0.000668103	up	P3H2	prolyl 3-hydroxylase 2 [Source:HGNC Symbol;Acc:HGNC:19317]	GO:0005604;GO:0031418;GO:0016705;GO:0005506;GO:0005794;GO:0005783;GO:0055114;GO:0016491;GO:0046872;GO:0051213;GO:0008285;GO:0005788;GO:0032963;GO:0019797;GO:0019511	-	KOG4459-Membrane-associated proteoglycan Leprecan[S]
ENSG00000163923	39.666	7.96096	2.31689	0.000442606	0.012948	up	RPL39L	ribosomal protein L39 like [Source:HGNC Symbol;Acc:HGNC:17094]	GO:0005515;GO:0005840;GO:0006412;GO:0003735;GO:0005622;GO:0030529;GO:0007283;GO:0003723;GO:0022625	-	KOG0002-60s ribosomal protein L39[J]
ENSG00000172403	2.24164	9.10623	-2.0223	1.36e-05	0.00086418	down	SYNPO2	synaptopodin 2 [Source:HGNC Symbol;Acc:HGNC:17732]	GO:0005515;GO:0015629;GO:0003779;GO:0005829;GO:0043231;GO:0005737;GO:0005634;GO:0030054;GO:0005856;GO:0005925;GO:0030018;GO:0071889;GO:0001725;GO:0031005;GO:0032233;GO:0051393;GO:0051371;GO:0099023;GO:0000045	-	-
ENSG00000276043	21.1642	4.3214	2.29206	2.08e-05	0.00119253	up	UHRF1	ubiquitin like with PHD and ring finger domains 1 [Source:HGNC Symbol;Acc:HGNC:12556]	GO:0008270;GO:0005634;GO:0042393;GO:0046872;GO:0005515;GO:0000790;GO:0016569;GO:0006355;GO:0006351;GO:0003677;GO:0016567;GO:0016740;GO:0007049;GO:0006281;GO:0006974;GO:0000122;GO:0061630;GO:0042787;GO:0045944;GO:0004842;GO:0003700;GO:0008283;GO:0042802;GO:0035064;GO:0008327;GO:0016363;GO:0005657;GO:0032270;GO:0000792;GO:0000987;GO:0051865;GO:0044729;GO:0010216;GO:0016574;GO:0090308;GO:0005720;GO:…	-	-
ENSG00000188783	6.08379	44.2578	-2.86289	0.000301084	0.00975626	down	PRELP	proline and arginine rich end leucine rich repeat protein [Source:HGNC Symbol;Acc:HGNC:9357]	GO:0005615;GO:0007569;GO:0008201;GO:0005576;GO:0005578;GO:0005201;GO:0070062;GO:0031012;GO:0001501;GO:0043202;GO:0005796;GO:1903561;GO:0018146;GO:0042340	-	KOG0619-FOG: Leucine rich repeat[R]
ENSG00000140285	1.2715	7.548	-2.56956	0.000853585	0.0208216	down	FGF7	fibroblast growth factor 7 [Source:HGNC Symbol;Acc:HGNC:3685]	GO:0005794;GO:0005576;GO:0060665;GO:0060445;GO:0050679;GO:0045893;GO:0031069;GO:0008284;GO:0005515;GO:0043547;GO:0008083;GO:0018108;GO:0036092;GO:0046854;GO:0005104;GO:0008543;GO:0008201;GO:0000165;GO:0007165;GO:0009611;GO:0046934;GO:0014066;GO:0048015;GO:0005088;GO:0016303;GO:0034394;GO:0004713;GO:0051781;GO:0008544;GO:0042056;GO:0010838;GO:0031532;GO:0050731;GO:0050918;GO:0051549;GO:0061033;GO:…	K04358-ko04014 Ras signaling pathway;ko04015 Rap1 signaling pathway;ko04010 MAPK signaling pathway;ko04151 PI3K-Akt signaling pathway;ko04810 Regulation of actin cytoskeleton;ko05200 Pathways in cancer;ko05218 Melanoma;ko05224 Breast cancer	KOG3885-Fibroblast growth factor[T]
ENSG00000076382	20.8782	5.21026	2.00257	0.00213765	0.0407813	up	SPAG5	sperm associated antigen 5 [Source:HGNC Symbol;Acc:HGNC:13452]	GO:0051301;GO:0051988;GO:0005515;GO:0005694;GO:0005737;GO:0007049;GO:0005856;GO:0005874;GO:0000922;GO:0005815;GO:0005819;GO:0030496;GO:0007059;GO:0000775;GO:0000776;GO:0000777;GO:0051294;GO:0005876;GO:0007051;GO:0034451;GO:0000070;GO:0072686;GO:0035371;GO:0071539	-	-
ENSG00000162896	10.1393	603.183	-5.89456	1.96e-08	4.08e-06	down	PIGR	polymeric immunoglobulin receptor [Source:HGNC Symbol;Acc:HGNC:8968]	GO:0005576;GO:0005886;GO:0016021;GO:0016020;GO:0005615;GO:0070062;GO:0001895;GO:0005887;GO:0043312;GO:0007173;GO:0035577;GO:0043113;GO:0043235;GO:0001580;GO:0001792;GO:0002415;GO:0038093	K13073-ko04672 Intestinal immune network for IgA production	-
ENSG00000162894	2.97168	18.5274	-2.64031	6.46e-05	0.00295212	down	FCMR	Fc fragment of IgM receptor [Source:HGNC Symbol;Acc:HGNC:14315]	GO:0005576;GO:0016021;GO:0016020;GO:0002376;GO:0043066;GO:0006968	-	-
ENSG00000092853	10.8925	2.87494	1.92172	0.000147457	0.00569273	up	CLSPN	claspin [Source:HGNC Symbol;Acc:HGNC:19715]	GO:0005515;GO:0003677;GO:0005654;GO:0005794;GO:0005634;GO:0007049;GO:0006281;GO:0006974;GO:0016579;GO:0006260;GO:0097194;GO:0000077;GO:0031572;GO:0032147;GO:0018105;GO:0010997;GO:0033314	-	KOG4156-Claspin, protein mediating phosphorylation and activation of Chk1 protein kinase in the DNA replication checkpoint response[DT]
ENSG00000128422	2114.29	110.246	4.26138	4.55e-10	1.77e-07	up	KRT17	keratin 17 [Source:HGNC Symbol;Acc:HGNC:6427]	GO:0071944;GO:0005737;GO:0051798;GO:0045727;GO:0045109;GO:0031424;GO:0031069;GO:0030307;GO:0002009;GO:0005882;GO:0007165;GO:0005515;GO:0045111;GO:0005198;GO:0005829;GO:0070062;GO:0005200;GO:0008544;GO:0070268;GO:0042289;GO:0032395	-	-
ENSG00000203785	810.525	16.5383	5.61498	2.03e-06	0.000209238	up	SPRR2E	small proline rich protein 2E [Source:HGNC Symbol;Acc:HGNC:11265]	GO:0001533;GO:0098773;GO:0018149;GO:0030280;GO:0005737;GO:0005515;GO:0031424;GO:0005829;GO:0008544;GO:0030216;GO:0005198;GO:0070268	-	-
ENSG00000214711	8.85147	87.9804	-3.31319	0.000600967	0.0162026	down	CAPN14	calpain 14 [Source:HGNC Symbol;Acc:HGNC:16664]	GO:0006508;GO:0005622;GO:0004198;GO:0008234;GO:0008233;GO:0005509;GO:0016787;GO:0046872;GO:0005737	-	KOG0045-Cytosolic Ca2+-dependent cysteine protease (calpain), large subunit (EF-Hand protein superfamily)[OT]
ENSG00000178695	7.48984	24.5118	-1.71047	1.96e-06	0.000204509	down	KCTD12	potassium channel tetramerization domain containing 12 [Source:HGNC Symbol;Acc:HGNC:14678]	GO:0005886;GO:0051260;GO:0016020;GO:0003723;GO:0030054;GO:0045202;GO:0045211;GO:0042802;GO:0070062;GO:0042734	-	KOG2723-Uncharacterized conserved protein, contains BTB/POZ domain[R]
ENSG00000231887	1.74548	4676.54	-11.3876	8.87e-30	2.13e-25	down	PRH1	proline rich protein HaeIII subfamily 1 [Source:HGNC Symbol;Acc:HGNC:9366]	-	-	-
ENSG00000261236	119.339	26.658	2.16242	3.34e-05	0.00174636	up	BOP1	block of proliferation 1 [Source:HGNC Symbol;Acc:HGNC:15519]	GO:0005730;GO:0042273;GO:0008283;GO:0006364;GO:0000448;GO:0043021;GO:0005515;GO:0005634;GO:0003723;GO:0005654;GO:0042254;GO:0030687;GO:0000463;GO:0051726;GO:0070545;GO:0030529	-	KOG0650-WD40 repeat nucleolar protein Bop1, involved in ribosome biogenesis[J]
ENSG00000242837	6.278	0.00692333	9.82462	0.000113588	0.00459619	up	RPL21P13	ribosomal protein L21 pseudogene 13 [Source:HGNC Symbol;Acc:HGNC:19812]	-	-	-
ENSG00000168026	1.59726	5.49787	-1.78327	0.000991631	0.0232469	down	TTC21A	tetratricopeptide repeat domain 21A [Source:HGNC Symbol;Acc:HGNC:30761]	GO:0005515	-	-
ENSG00000012124	2.86751	9.88442	-1.78536	0.000325629	0.0103702	down	CD22	CD22 molecule [Source:HGNC Symbol;Acc:HGNC:1643]	GO:0005515;GO:0005886;GO:0007155;GO:0030246;GO:0016021;GO:0016020;GO:0070062	K06467-ko04514 Cell adhesion molecules (CAMs);ko04640 Hematopoietic cell lineage;ko04662 B cell receptor signaling pathway	-
ENSG00000118308	5.53225	28.8487	-2.38257	1.95e-08	4.08e-06	down	LRMP	lymphoid restricted membrane protein [Source:HGNC Symbol;Acc:HGNC:6690]	GO:0016021;GO:0016020;GO:0005694;GO:0005789;GO:0005783;GO:0005737;GO:0005634;GO:0005856;GO:0002376;GO:0000922;GO:0005815;GO:0005886;GO:0007338;GO:0005887;GO:0043312;GO:0006903;GO:0035577;GO:0005635;GO:0006906	-	-
ENSG00000104951	8.86386	1.85229	2.25863	0.00118416	0.0265454	up	IL4I1	interleukin 4 induced 1 [Source:HGNC Symbol;Acc:HGNC:19094]	GO:0055114;GO:0016491;GO:0005764;GO:0005576;GO:0006559;GO:0001716	K03334-ko00250 Alanine, aspartate and glutamate metabolism;ko00270 Cysteine and methionine metabolism;ko00280 Valine, leucine and isoleucine degradation;ko00350 Tyrosine metabolism;ko00360 Phenylalanine metabolism;ko00380 Tryptophan metabolism;ko00400 Phenylalanine, tyrosine and tryptophan biosynthesis;ko00950 Isoquinoline alkaloid biosynthesis	-
ENSG00000247077	50.3127	15.5171	1.69707	0.00201927	0.0389239	up	PGAM5	PGAM family member 5, mitochondrial serine/threonine protein phosphatase [Source:HGNC Symbol;Acc:HGNC:28763]	GO:0043547;GO:0004721;GO:0005739;GO:0016311;GO:0016787;GO:0016021;GO:0016020;GO:0005741;GO:0006470;GO:0007165;GO:0005096;GO:0012501;GO:0070266;GO:0032403;GO:0004722;GO:0016236;GO:0016791;GO:0009400	K15637-ko04668 TNF signaling pathway	KOG4609-Predicted phosphoglycerate mutase[R]
ENSG00000266964	2.95814	23.6885	-3.00142	5.65e-09	1.45e-06	down	FXYD1	FXYD domain containing ion transport regulator 1 [Source:HGNC Symbol;Acc:HGNC:4025]	GO:0006811;GO:0005216;GO:0016020;GO:0016021;GO:0006810;GO:0005254;GO:0006821;GO:0034707;GO:1902476;GO:0005886;GO:0017080;GO:2000649;GO:0034220;GO:0005887;GO:0044325;GO:0006936;GO:0008016;GO:0086036;GO:1903278;GO:1903779;GO:0005890;GO:0042383	K13360-ko04024 cAMP signaling pathway	-
ENSG00000143674	7.39548	1.63992	2.17301	0.00117528	0.0264448	up	MAP3K21	mitogen-activated protein kinase kinase kinase 21 [Source:HGNC Symbol;Acc:HGNC:29798]	GO:0005515;GO:0042803;GO:0016310;GO:0016301;GO:0016740;GO:0006468;GO:0005524;GO:0004674;GO:0000166;GO:0004672;GO:0000186;GO:0004709;GO:0005737;GO:0005575;GO:0046777;GO:0007257;GO:0004706;GO:0007256;GO:0005634;GO:0035556;GO:0004871	-	KOG0192-Tyrosine kinase specific for activated (GTP-bound) p21cdc42Hs[T]
ENSG00000137033	2.67295	30.5903	-3.51657	3.87e-09	1.06e-06	down	IL33	interleukin 33 [Source:HGNC Symbol;Acc:HGNC:16028]	GO:0097191;GO:0090197;GO:0061518;GO:0051607;GO:0051025;GO:0051024;GO:0050729;GO:0045944;GO:0043032;GO:0032755;GO:0032754;GO:0032753;GO:0032736;GO:0032689;GO:0032436;GO:0010628;GO:0002830;GO:0002826;GO:0002686;GO:0002282;GO:0002281;GO:0005125;GO:0005576;GO:0005515;GO:0005694;GO:0006351;GO:0005654;GO:0005829;GO:0005634;GO:0005615;GO:0031410;GO:0016579;GO:0030133;GO:0042092	K12967-ko04623 Cytosolic DNA-sensing pathway;ko05164 Influenza A	-
ENSG00000173805	14.3737	0.425108	5.07945	5.79e-08	1.05e-05	up	HAP1	huntingtin associated protein 1 [Source:HGNC Symbol;Acc:HGNC:4812]	GO:0005829;GO:0005730;GO:0005515;GO:0005739;GO:1904115;GO:0005783;GO:0015031;GO:0005737;GO:0005634;GO:0006810;GO:0030054;GO:0045202;GO:0005856;GO:0031410;GO:0006914;GO:0005764;GO:0042995;GO:0030424;GO:0030030;GO:0044325;GO:0006887;GO:0005776;GO:0008089;GO:0015629;GO:0007420;GO:0007268;GO:0008021;GO:0008104;GO:0045742;GO:0048011;GO:0008090;GO:0017157;GO:1902513;GO:0016234;GO:0031587;GO:0048403;GO:…	K04647-ko04727 GABAergic synapse;ko05016 Huntington's disease	-
ENSG00000165475	8.71914	22.3169	-1.35588	0.000410767	0.0122245	down	CRYL1	crystallin lambda 1 [Source:HGNC Symbol;Acc:HGNC:18246]	GO:0042803;GO:0070403;GO:0005829;GO:0055114;GO:0016491;GO:0005737;GO:0003857;GO:0006631;GO:0070062;GO:0019640;GO:0050104	K13247-ko00040 Pentose and glucuronate interconversions	KOG2305-3-hydroxyacyl-CoA dehydrogenase[I]
ENSG00000138356	1.00756	5.86502	-2.54128	1.98e-05	0.00115164	down	AOX1	aldehyde oxidase 1 [Source:HGNC Symbol;Acc:HGNC:553]	GO:0016604;GO:0005506;GO:0051287;GO:0051537;GO:0003824;GO:0046872;GO:0055114;GO:0050660;GO:0016491;GO:0005829;GO:0005737;GO:0051536;GO:0009055;GO:0043546;GO:0016614;GO:0070062;GO:0006954;GO:0042816;GO:0004031;GO:0016903;GO:0004854;GO:0009115;GO:0072593	K00157-ko00280 Valine, leucine and isoleucine degradation;ko00350 Tyrosine metabolism;ko00380 Tryptophan metabolism;ko00750 Vitamin B6 metabolism;ko00760 Nicotinate and nicotinamide metabolism;ko00830 Retinol metabolism;ko00982 Drug metabolism - cytochrome P450;ko04630 Jak-STAT signaling pathway	KOG0430-Xanthine dehydrogenase[F]
ENSG00000099953	37.0522	2.02261	4.19527	3.7e-10	1.54e-07	up	MMP11	matrix metallopeptidase 11 [Source:HGNC Symbol;Acc:HGNC:7157]	GO:0071711;GO:0045599;GO:0030574;GO:0030199;GO:0030198;GO:0008237;GO:0005576;GO:0006508;GO:0008233;GO:0007275;GO:0005509;GO:0016787;GO:0046872;GO:0008270;GO:0005578;GO:0004222;GO:0031012;GO:0004252;GO:0005796;GO:0022617	-	KOG1565-Gelatinase A and related matrix metalloproteases[OW]
ENSG00000104356	7.73566	1.79741	2.10561	0.000524335	0.0147989	up	POP1	POP1 homolog, ribonuclease P/MRP subunit [Source:HGNC Symbol;Acc:HGNC:30129]	GO:0090501;GO:0090502;GO:0004526;GO:0001682;GO:0005515;GO:0005739;GO:0016787;GO:0008033;GO:0005730;GO:0043231;GO:0005794;GO:0005634;GO:0006396;GO:0003723;GO:0005615;GO:0005654;GO:0000171;GO:0016078;GO:0000172;GO:0005655	K01164-ko03013 RNA transport;ko03008 Ribosome biogenesis in eukaryotes	KOG3322-Ribonucleases P/MRP protein subunit[A]
ENSG00000261373	24.1084	4.17598	2.52935	0.000178186	0.00662158	up	VPS9D1-AS1	VPS9D1 antisense RNA 1 [Source:HGNC Symbol;Acc:HGNC:48915]	-	-	-
ENSG00000110172	42.7773	13.0452	1.71333	0.000260873	0.00869912	up	CHORDC1	cysteine and histidine rich domain containing 1 [Source:HGNC Symbol;Acc:HGNC:14525]	GO:2000299;GO:1900034;GO:0061077;GO:0010824;GO:0043531;GO:0008270;GO:0005524;GO:0005515;GO:0046872;GO:0005575;GO:0051879	-	KOG1667-Zn2+-binding protein Melusin/RAR1, contains CHORD domain[R]
ENSG00000069535	2.11674	13.5239	-2.67559	3.43e-05	0.00177732	down	MAOB	monoamine oxidase B [Source:HGNC Symbol;Acc:HGNC:6834]	GO:0005743;GO:0005741;GO:0005739;GO:0051412;GO:0048545;GO:0045964;GO:0045471;GO:0042493;GO:0042135;GO:0032496;GO:0014063;GO:0010269;GO:0010044;GO:0009636;GO:0050660;GO:0042803;GO:0008131;GO:0055114;GO:0016491;GO:0016021;GO:0016020;GO:0070062;GO:0021762;GO:0009055;GO:0005740;GO:0042420;GO:0050665	K00274-ko00260 Glycine, serine and threonine metabolism;ko00330 Arginine and proline metabolism;ko00340 Histidine metabolism;ko00350 Tyrosine metabolism;ko00360 Phenylalanine metabolism;ko00380 Tryptophan metabolism;ko00950 Isoquinoline alkaloid biosynthesis;ko00982 Drug metabolism - cytochrome P450;ko04728 Dopaminergic synapse;ko04726 Serotonergic synapse;ko05030 Cocaine addiction;ko05031 Amphet…	KOG0029-Amine oxidase[Q]
ENSG00000184148	82.5071	0.168643	8.9344	0.00059121	0.0159753	up	SPRR4	small proline rich protein 4 [Source:HGNC Symbol;Acc:HGNC:23173]	GO:0005737;GO:0031424;GO:0005938;GO:0005198;GO:0018149;GO:0030216;GO:0001533	-	-
ENSG00000006042	6.08761	17.4556	-1.51974	0.00229576	0.042814	down	TMEM98	transmembrane protein 98 [Source:HGNC Symbol;Acc:HGNC:24529]	GO:0016021;GO:0016020;GO:0005783	-	-
ENSG00000007312	3.83817	15.0099	-1.96742	4.46e-05	0.00219502	down	CD79B	CD79b molecule [Source:HGNC Symbol;Acc:HGNC:1699]	GO:0019815;GO:0009897;GO:0050853;GO:0051260;GO:0042803;GO:0005515;GO:0005886;GO:0005654;GO:0005829;GO:0016020;GO:0005794;GO:0016021;GO:0004888;GO:0007166;GO:0002376;GO:0002250;GO:0005737;GO:0070062;GO:0005887;GO:0006955;GO:0007165;GO:0030183	K06507-ko04662 B cell receptor signaling pathway	-
ENSG00000125999	29.6485	8644.23	-8.18763	8.87e-05	0.00373151	down	BPIFB1	BPI fold containing family B member 1 [Source:HGNC Symbol;Acc:HGNC:16108]	GO:0008289;GO:0005576;GO:0005615;GO:0002376;GO:0045087;GO:0003674;GO:0070062;GO:0034144;GO:0002227;GO:0019730	-	KOG4160-BPI/LBP/CETP family protein[V]
ENSG00000075218	19.2319	4.43495	2.11651	5.77e-05	0.00270054	up	GTSE1	G2 and S-phase expressed 1 [Source:HGNC Symbol;Acc:HGNC:13698]	GO:0005515;GO:0016020;GO:0005737;GO:0005856;GO:0005874;GO:0003674;GO:0005829;GO:0043161;GO:0005654;GO:0005881;GO:0046827;GO:1902749;GO:0050821;GO:0006977;GO:0007017;GO:1900182;GO:0030335;GO:1904527	-	-
ENSG00000147536	13.7336	2.22807	2.62385	1.36e-05	0.00086418	up	GINS4	GINS complex subunit 4 [Source:HGNC Symbol;Acc:HGNC:28226]	GO:0005737;GO:0005634;GO:0001833;GO:0005515;GO:0032508;GO:0006260;GO:0005654;GO:0000727;GO:0006270;GO:0043138;GO:0031298;GO:0006271;GO:0000811	-	KOG3176-Predicted alpha-helical protein, potentially involved in replication/repair[L]
ENSG00000179148	11.5576	0.289344	5.31991	6.41e-10	2.3e-07	up	ALOXE3	arachidonate lipoxygenase 3 [Source:HGNC Symbol;Acc:HGNC:13743]	GO:0046872;GO:0055114;GO:0016491;GO:0051213;GO:0016702;GO:0005515;GO:0005506;GO:0006631;GO:0006629;GO:0016829;GO:0016853;GO:0005737;GO:0006665;GO:0005829;GO:0045444;GO:0061436;GO:0019369;GO:0019372;GO:0051122;GO:0035357;GO:0043651;GO:0046513;GO:0019233;GO:0051120	-	-
ENSG00000234456	1.70056	6.93954	-2.02883	7.2e-06	0.000546761	down	MAGI2-AS3	MAGI2 antisense RNA 3 [Source:HGNC Symbol;Acc:HGNC:40862]	-	-	-
ENSG00000228175	8.43629	1.12387	2.90813	0.00221899	0.0417515	up	GEMIN8P4	gem nuclear organelle associated protein 8 pseudogene 4 [Source:HGNC Symbol;Acc:HGNC:37979]	-	-	-
ENSG00000168447	8.71325	39.3773	-2.17608	8.35e-06	0.000603507	down	SCNN1B	sodium channel epithelial 1 beta subunit [Source:HGNC Symbol;Acc:HGNC:10600]	GO:0034706;GO:0016021;GO:0016020;GO:0009897;GO:0006814;GO:0050699;GO:0015280;GO:0005272;GO:0035725;GO:0005515;GO:0005886;GO:0006811;GO:0006810;GO:0030659;GO:0031410;GO:0050896;GO:0005887;GO:0050909;GO:0070062;GO:0034220;GO:0016324;GO:0007588;GO:0050891;GO:0055078	K04825-ko04960 Aldosterone-regulated sodium reabsorption;ko04742 Taste transduction	KOG4294-Non voltage-gated ion channels (DEG/ENaC family)[PT]
ENSG00000152518	45.7188	109.816	-1.26423	0.000364903	0.0111916	down	ZFP36L2	ZFP36 ring finger protein like 2 [Source:HGNC Symbol;Acc:HGNC:1108]	GO:0005737;GO:0005634;GO:2000737;GO:1901991;GO:1900153;GO:0061158;GO:0060216;GO:0048103;GO:0045599;GO:0045577;GO:0044344;GO:0043488;GO:0035019;GO:0033077;GO:0030097;GO:0006402;GO:0000288;GO:0000165;GO:0035925;GO:0030529;GO:0003677;GO:0046872;GO:0003723;GO:0007275;GO:0006355;GO:0005515;GO:0005829;GO:0071356;GO:0070371;GO:0003700;GO:0071560;GO:0008283;GO:0017091;GO:0009611;GO:0071364;GO:0097011;GO:…	-	KOG1677-CCCH-type Zn-finger protein[R]
ENSG00000104332	2.11016	32.1697	-3.93028	4.51e-08	8.41e-06	down	SFRP1	secreted frizzled related protein 1 [Source:HGNC Symbol;Acc:HGNC:10776]	GO:0005615;GO:2001238;GO:2000041;GO:1904956;GO:0090246;GO:0090244;GO:0090179;GO:0090175;GO:0090090;GO:0071542;GO:0071481;GO:0071391;GO:0060687;GO:0060527;GO:0060346;GO:0060071;GO:0048546;GO:0046546;GO:0045671;GO:0045668;GO:0045578;GO:0044345;GO:0043508;GO:0042493;GO:0035019;GO:0033689;GO:0030514;GO:0030279;GO:0030178;GO:0030097;GO:0021915;GO:0014034;GO:0010975;GO:0010629;GO:0009952;GO:0008585;GO:…	K02166-ko04310 Wnt signaling pathway	KOG3577-Smoothened and related G-protein-coupled receptors[T]
ENSG00000257390	6.93179	0.0754193	6.52215	1.02e-08	2.3e-06	up	AC023055.1	-	GO:0005515;GO:0016607;GO:0000932	-	-
ENSG00000243955	3.50154	197.97	-5.82115	2.32e-12	1.46e-09	down	GSTA1	glutathione S-transferase alpha 1 [Source:HGNC Symbol;Acc:HGNC:4626]	GO:0008152;GO:0016740;GO:0005829;GO:0005737;GO:0098869;GO:0004364;GO:0070062;GO:0006749;GO:0030855;GO:1901687;GO:0004602;GO:0043651	K00799-ko00480 Glutathione metabolism;ko00980 Metabolism of xenobiotics by cytochrome P450;ko00982 Drug metabolism - cytochrome P450;ko05204 Chemical carcinogenesis;ko01524 Platinum drug resistance	KOG1695-Glutathione S-transferase[O]
ENSG00000117724	29.025	6.74272	2.10589	0.000618357	0.0165987	up	CENPF	centromere protein F [Source:HGNC Symbol;Acc:HGNC:1857]	GO:0097539;GO:0045120;GO:0036064;GO:0005930;GO:0005813;GO:0005634;GO:0016202;GO:0042803;GO:0005515;GO:0008134;GO:0005694;GO:0051301;GO:0005654;GO:0015031;GO:0005737;GO:0007275;GO:0007049;GO:0048471;GO:0030154;GO:0005856;GO:0000922;GO:0005819;GO:0030496;GO:0007059;GO:0000775;GO:0000776;GO:0000777;GO:0005829;GO:0003682;GO:0008283;GO:0070840;GO:0007517;GO:0008022;GO:0071897;GO:0007062;GO:0045892;GO:…	-	-
ENSG00000175063	125.978	31.9711	1.97834	0.000835658	0.0204708	up	UBE2C	ubiquitin conjugating enzyme E2 C [Source:HGNC Symbol;Acc:HGNC:15937]	GO:0005515;GO:0005886;GO:0051301;GO:0016567;GO:0016740;GO:0005829;GO:0005524;GO:0000166;GO:0006511;GO:0007049;GO:0005737;GO:0031625;GO:0061631;GO:0031145;GO:0043161;GO:0051437;GO:0061630;GO:0005654;GO:0051436;GO:0004842;GO:0010458;GO:0010994;GO:0030071;GO:0031536;GO:0042787;GO:0051439;GO:0070936;GO:0070979;GO:1904668;GO:0005680	K06688-ko04120 Ubiquitin mediated proteolysis	KOG0421-Ubiquitin-protein ligase[O]
ENSG00000111452	0.797071	6.46214	-3.01923	9.93e-08	1.62e-05	down	ADGRD1	adhesion G protein-coupled receptor D1 [Source:HGNC Symbol;Acc:HGNC:19893]	GO:0007165;GO:0004871;GO:0005886;GO:0007186;GO:0004930;GO:0016020;GO:0016021;GO:0004888;GO:0007166;GO:0010579	-	KOG4193-G protein-coupled receptors[T]
ENSG00000149968	28.0712	0.894331	4.97214	4.41e-07	5.83e-05	up	MMP3	matrix metallopeptidase 3 [Source:HGNC Symbol;Acc:HGNC:7173]	GO:0005576;GO:0006508;GO:0008233;GO:0005509;GO:0016787;GO:0046872;GO:0008270;GO:0005578;GO:0004222;GO:0008237;GO:0031012;GO:0004252;GO:0005515;GO:0032461;GO:0030574;GO:0005615;GO:0022617;GO:0004175;GO:0010727;GO:0071732;GO:1903209	K01394-ko04668 TNF signaling pathway;ko05202 Transcriptional misregulation in cancers;ko05323 Rheumatoid arthritis	KOG1565-Gelatinase A and related matrix metalloproteases[OW]
ENSG00000197870	0.775037	1326.95	-10.7416	3.53e-23	2.13e-19	down	PRB3	proline rich protein BstNI subfamily 3 [Source:HGNC Symbol;Acc:HGNC:9339]	GO:0005576;GO:0008150;GO:0050829	-	-
ENSG00000262406	49.7478	0.954261	5.7041	5.85e-16	8.28e-13	up	MMP12	matrix metallopeptidase 12 [Source:HGNC Symbol;Acc:HGNC:7158]	GO:0005634;GO:0005615;GO:1902741;GO:0098586;GO:0060340;GO:0060339;GO:0050691;GO:0010628;GO:0006606;GO:0000122;GO:0043565;GO:0005518;GO:0004222;GO:0001047;GO:0005509;GO:0045944;GO:0006508;GO:0005737;GO:0008270;GO:0005576;GO:0008233;GO:0016787;GO:0046872;GO:0005578;GO:0008237;GO:0031012;GO:0004252;GO:0030574;GO:0042060;GO:0060054;GO:0004175;GO:0022617;GO:0035313	-	-
ENSG00000244617	108.553	2.08949	5.6991	3.34e-06	0.000302773	up	ASPRV1	aspartic peptidase, retroviral-like 1 [Source:HGNC Symbol;Acc:HGNC:26321]	GO:0043588;GO:0016485;GO:0004190;GO:0006508;GO:0008233;GO:0016787;GO:0016021;GO:0016020	-	-
ENSG00000122756	0.185605	10.502	-5.82229	2.88e-13	2.39e-10	down	CNTFR	ciliary neurotrophic factor receptor [Source:HGNC Symbol;Acc:HGNC:2170]	GO:0005515;GO:0005886;GO:0016020;GO:0004896;GO:0031225;GO:0007399;GO:0007165;GO:0019898;GO:0005102;GO:0019955;GO:0004897;GO:0070120;GO:0070110;GO:0016324;GO:0097059;GO:0060538;GO:0043524;GO:0008284;GO:0007548;GO:0003360;GO:0001967;GO:0019221	K05059-ko04630 Jak-STAT signaling pathway;ko04060 Cytokine-cytokine receptor interaction	-
ENSG00000161281	3.51511	13.2393	-1.91319	0.000432536	0.0127152	down	COX7A1	cytochrome c oxidase subunit 7A1 [Source:HGNC Symbol;Acc:HGNC:2287]	GO:0005739;GO:1902600;GO:0005743;GO:0016021;GO:0016020;GO:0004129;GO:0009055;GO:0005746;GO:0006091	K02270-ko00190 Oxidative phosphorylation;ko04260 Cardiac muscle contraction;ko05010 Alzheimer's disease;ko05012 Parkinson's disease;ko05016 Huntington's disease;ko04932 Non-alcoholic fatty liver disease (NAFLD)	-
ENSG00000141540	14.301	2.6376	2.43882	0.000440151	0.0128918	up	TTYH2	tweety family member 2 [Source:HGNC Symbol;Acc:HGNC:13877]	GO:0005886;GO:0006811;GO:0016021;GO:0016020;GO:0006810;GO:0005254;GO:0006821;GO:0034707;GO:1902476;GO:0005515	-	KOG4433-Tweety transmembrane/cell surface protein[R]
ENSG00000116678	3.92532	33.2104	-3.08075	2.93e-11	1.53e-08	down	LEPR	leptin receptor [Source:HGNC Symbol;Acc:HGNC:6554]	GO:0005576;GO:0005515;GO:0005886;GO:0016020;GO:0016021;GO:0004896;GO:0016323;GO:0007275;GO:0007166;GO:0060259;GO:0030217;GO:0001525;GO:2000505;GO:0004888;GO:0043235;GO:0042593;GO:0046850;GO:0006112;GO:0019953;GO:0010507;GO:0044321;GO:0033210;GO:0097009;GO:0098868;GO:0038021;GO:0051346;GO:0045721;GO:0008203;GO:0006909	K05062-ko04630 Jak-STAT signaling pathway;ko04152 AMPK signaling pathway;ko04080 Neuroactive ligand-receptor interaction;ko04060 Cytokine-cytokine receptor interaction;ko04920 Adipocytokine signaling pathway;ko04932 Non-alcoholic fatty liver disease (NAFLD)	-
ENSG00000181027	9.91694	4.17134	1.24938	2.83e-06	0.000268293	up	FKRP	fukutin related protein [Source:HGNC Symbol;Acc:HGNC:17997]	GO:0042383;GO:0016010;GO:0005794;GO:0005615;GO:0016485;GO:0009101;GO:0005576;GO:0005886;GO:0005783;GO:0016740;GO:0005829;GO:0005634;GO:0016021;GO:0016020;GO:0000139;GO:0006486;GO:0035269;GO:0005791	-	-
ENSG00000065328	7.23382	2.12121	1.76987	0.00107054	0.0245939	up	MCM10	minichromosome maintenance 10 replication initiation factor [Source:HGNC Symbol;Acc:HGNC:18043]	GO:0005515;GO:0003677;GO:0005730;GO:0005634;GO:0046872;GO:0006974;GO:0006260;GO:0042802;GO:0005654;GO:0003697;GO:0000082;GO:0006270;GO:0003688;GO:0031298;GO:0008283;GO:0019899	-	KOG3056-Protein required for S-phase initiation or completion[D]
ENSG00000102547	2.09115	12.6161	-2.5929	8.51e-09	2e-06	down	CAB39L	calcium binding protein 39 like [Source:HGNC Symbol;Acc:HGNC:20290]	GO:0005515;GO:0005829;GO:0070062;GO:0007050	K08272-ko04152 AMPK signaling pathway;ko04150 mTOR signaling pathway	KOG1566-Conserved protein Mo25[S]
ENSG00000180776	22.7383	6.57968	1.78903	4.41e-07	5.83e-05	up	ZDHHC20	zinc finger DHHC-type containing 20 [Source:HGNC Symbol;Acc:HGNC:20749]	GO:0005886;GO:0019706;GO:0016746;GO:0016740;GO:0016021;GO:0016020;GO:0016409;GO:0018345	-	KOG1315-Predicted DHHC-type Zn-finger protein[R]
ENSG00000115415	181.602	34.0133	2.41661	0.000439285	0.0128821	up	STAT1	signal transducer and activator of transcription 1 [Source:HGNC Symbol;Acc:HGNC:11362]	GO:0004871;GO:0003700;GO:0007165;GO:0006355;GO:0005634;GO:0005515;GO:0042803;GO:0006351;GO:0003677;GO:0005654;GO:0005829;GO:0005730;GO:0005737;GO:0006915;GO:0048471;GO:0045893;GO:0030425;GO:0042802;GO:0051607;GO:0000122;GO:0045296;GO:0030424;GO:0003690;GO:0016032;GO:0042981;GO:0045944;GO:0019899;GO:0000790;GO:0001937;GO:0016525;GO:0060333;GO:0060334;GO:0043124;GO:0005164;GO:0033209;GO:0060337;GO:…	K11220-ko04630 Jak-STAT signaling pathway;ko04620 Toll-like receptor signaling pathway;ko04062 Chemokine signaling pathway;ko04917 Prolactin signaling pathway;ko04919 Thyroid hormone signaling pathway;ko04380 Osteoclast differentiation;ko05200 Pathways in cancer;ko05212 Pancreatic cancer;ko05321 Inflammatiory bowel disease (IBD);ko04933 AGE-RAGE signaling pathway in diabetic complications;ko05152…	KOG3667-STAT protein[KT]
ENSG00000053108	6.96389	1.14014	2.61068	0.000310683	0.00998207	up	FSTL4	follistatin like 4 [Source:HGNC Symbol;Acc:HGNC:21389]	GO:0030141;GO:0061000;GO:0048671;GO:0048670;GO:0031549;GO:0048403;GO:0005576;GO:0005509;GO:0046872	-	-
ENSG00000233834	2.06528	14.4643	-2.8081	4.65e-05	0.00227653	down	AC005083.1	-	-	-	-
ENSG00000243156	22.6697	7.40617	1.61397	9.37e-06	0.000657989	up	MICAL3	microtubule associated monooxygenase, calponin and LIM domain containing 3 [Source:HGNC Symbol;Acc:HGNC:24694]	GO:0005886;GO:0051301;GO:0003779;GO:0006887;GO:0055114;GO:0016491;GO:0004497;GO:0005654;GO:0005829;GO:0046872;GO:0008270;GO:0005737;GO:0005634;GO:0007049;GO:0005856;GO:0017137;GO:0071949;GO:0042995;GO:0005819;GO:0030496;GO:0016709;GO:0007010;GO:0005938;GO:0030042	-	KOG1700-Regulatory protein MLP and related LIM proteins[TZ]
ENSG00000171195	0.0304623	20.6561	-9.40532	1.44e-06	0.000157461	down	MUC7	mucin 7, secreted [Source:HGNC Symbol;Acc:HGNC:7518]	GO:0005576;GO:0005515;GO:0005886;GO:0070062;GO:0002223;GO:0005796;GO:0016266	K13909-ko04970 Salivary secretion	-
ENSG00000136492	6.62844	1.5361	2.1094	0.000157945	0.00602642	up	BRIP1	BRCA1 interacting protein C-terminal helicase 1 [Source:HGNC Symbol;Acc:HGNC:20473]	GO:0005737;GO:0005634;GO:1990918;GO:1904385;GO:0072520;GO:0071456;GO:0071295;GO:0051026;GO:0010705;GO:0010629;GO:0008584;GO:0009636;GO:0008285;GO:0007286;GO:0007284;GO:0007283;GO:0007129;GO:0003682;GO:0005515;GO:0003677;GO:0031965;GO:0032508;GO:0006139;GO:0016818;GO:0008026;GO:0004386;GO:0004003;GO:0016787;GO:0005524;GO:0000166;GO:0046872;GO:0003676;GO:0006281;GO:0006974;GO:0051536;GO:0051539;GO:…	K15362-ko03460 Fanconi anemia pathway	KOG1132-Helicase of the DEAD superfamily[L]
ENSG00000218416	0.54617	10.1806	-4.22033	1.57e-09	4.97e-07	down	PP14571	uncharacterized LOC100130449 [Source:NCBI gene;Acc:100130449]	-	-	-
ENSG00000145506	42.5056	9.49732	2.16206	0.00197889	0.0384101	up	NKD2	naked cuticle homolog 2 [Source:HGNC Symbol;Acc:HGNC:17046]	GO:0051117;GO:0032036;GO:0070382;GO:0005886;GO:0005515;GO:0005509;GO:0046872;GO:0016020;GO:0005737;GO:0006810;GO:0016055;GO:0031410;GO:0031625;GO:0006887;GO:0016328;GO:0032436;GO:0019838;GO:0071944;GO:0090004;GO:0090090;GO:0016323;GO:0072661;GO:0048210;GO:0010954	K03213-ko04310 Wnt signaling pathway	-
ENSG00000261520	1.40915	5.14066	-1.86713	2.5e-06	0.000244048	down	DLGAP1-AS5	DLGAP1 antisense RNA 5 [Source:HGNC Symbol;Acc:HGNC:27586]	-	-	-
ENSG00000156453	13.7447	29.692	-1.1112	0.00278147	0.0494005	down	PCDH1	protocadherin 1 [Source:HGNC Symbol;Acc:HGNC:8655]	GO:0030054;GO:0005886;GO:0007156;GO:0007155;GO:0005509;GO:0005730;GO:0005634;GO:0016020;GO:0043231;GO:0016021;GO:0005887;GO:0007399;GO:0007267;GO:0005911	-	-
ENSG00000263961	45.2982	4.57504	3.3076	0.00214019	0.0407975	up	C1orf186	chromosome 1 open reading frame 186 [Source:HGNC Symbol;Acc:HGNC:25341]	GO:0005886;GO:0016021;GO:0016020	-	-
ENSG00000134398	1.8145	16.0259	-3.14276	0.00132906	0.0288691	down	ERN2	endoplasmic reticulum to nucleus signaling 2 [Source:HGNC Symbol;Acc:HGNC:16942]	GO:0006397;GO:0006468;GO:0005524;GO:0004672;GO:0090501;GO:0004540;GO:1990604;GO:0070059;GO:0034976;GO:0007257;GO:0007050;GO:0006355;GO:0008152;GO:0003824;GO:0090305;GO:0006351;GO:0016787;GO:0016310;GO:0016301;GO:0005789;GO:0005783;GO:0016740;GO:0004674;GO:0000166;GO:0046872;GO:0016021;GO:0016020;GO:0006915;GO:0004519;GO:0000287;GO:0045892;GO:0030263;GO:0016075	-	KOG1027-Serine/threonine protein kinase and endoribonuclease ERN1/IRE1, sensor of the unfolded protein response pathway[T]
ENSG00000276023	80.851	22.0941	1.8716	0.000550002	0.0152205	up	DUSP14	dual specificity phosphatase 14 [Source:HGNC Symbol;Acc:HGNC:17007]	GO:0000188;GO:0017017;GO:0005515;GO:0004721;GO:0035335;GO:0016311;GO:0016791;GO:0006470;GO:0008138;GO:0004725;GO:0016787;GO:0003723	-	KOG1718-Dual specificity phosphatase[V]
ENSG00000135114	33.6127	1.50748	4.47879	2.76e-06	0.000262304	up	OASL	2'-5'-oligoadenylate synthetase like [Source:HGNC Symbol;Acc:HGNC:8090]	GO:0003725;GO:0006955;GO:0003677;GO:0005654;GO:0005829;GO:0005524;GO:0016020;GO:0005737;GO:0005634;GO:0003723;GO:0016740;GO:0051607;GO:0002376;GO:0045087;GO:0005730;GO:0009615;GO:0045071;GO:0060333;GO:0060337;GO:0046966	-	KOG0001-Ubiquitin and ubiquitin-like proteins[OR]
ENSG00000101361	143.547	41.5237	1.78951	0.000984423	0.0231004	up	NOP56	NOP56 ribonucleoprotein [Source:HGNC Symbol;Acc:HGNC:15911]	GO:0001650;GO:0030529;GO:0016020;GO:0005737;GO:0005634;GO:0003723;GO:0005654;GO:0005730;GO:0032040;GO:0005515;GO:0045296;GO:0042254;GO:0031428;GO:0006364;GO:0030515;GO:1990226;GO:0000154;GO:0005732;GO:0070761	K14564-ko03008 Ribosome biogenesis in eukaryotes	KOG2572-Ribosome biogenesis protein - Nop58p/Nop5p[AJ]
ENSG00000164086	85.9313	30.5273	1.49309	0.00134212	0.0289802	up	DUSP7	dual specificity phosphatase 7 [Source:HGNC Symbol;Acc:HGNC:3073]	GO:0000188;GO:0017017;GO:0005515;GO:0004721;GO:0005829;GO:0016311;GO:0016791;GO:0006470;GO:0008138;GO:0016787;GO:0005737;GO:0004725;GO:0000165;GO:0005654;GO:0035335;GO:0000187;GO:0043407	K04459-ko04010 MAPK signaling pathway	KOG1717-Dual specificity phosphatase[V]
ENSG00000134551	1.33406	13047.6	-13.2557	6.41e-13	4.98e-10	down	PRH2	proline rich protein HaeIII subfamily 2 [Source:HGNC Symbol;Acc:HGNC:9367]	GO:0005576;GO:0005515;GO:0005615	-	-
ENSG00000122042	9.50969	27.701	-1.54247	0.000373679	0.0114027	down	UBL3	ubiquitin like 3 [Source:HGNC Symbol;Acc:HGNC:12504]	GO:0005886;GO:0016020;GO:0070062;GO:0005622	-	-
ENSG00000126549	11.5926	3497.58	-8.23701	1.4e-16	2.3e-13	down	STATH	statherin [Source:HGNC Symbol;Acc:HGNC:11369]	GO:0005576;GO:0005515;GO:0042742;GO:0030500;GO:0031214;GO:0030502;GO:0030197;GO:0030345;GO:0046848;GO:0001503;GO:0046541	K13914-ko04970 Salivary secretion	-
ENSG00000175600	8.1702	0.937643	3.12326	0.000933952	0.0221973	up	SUGCT	succinyl-CoA:glutarate-CoA transferase [Source:HGNC Symbol;Acc:HGNC:16001]	GO:0005739;GO:0003824;GO:0016740;GO:0047369	-	-
ENSG00000223784	7.65089	1.28622	2.57249	0.000298372	0.00972885	up	LINP1	lncRNA in non-homologous end joining pathway 1 [Source:HGNC Symbol;Acc:HGNC:53170]	-	-	-
ENSG00000026025	246.993	540.037	-1.12859	0.000751069	0.0188166	down	VIM	vimentin [Source:HGNC Symbol;Acc:HGNC:12692]	GO:0043005;GO:0042995;GO:0031252;GO:0005886;GO:0005882;GO:0005737;GO:0070307;GO:0060395;GO:0060020;GO:0045109;GO:0045103;GO:0014002;GO:0010977;GO:0010628;GO:0005212;GO:0005198;GO:0005515;GO:0005829;GO:0005856;GO:0005925;GO:0005777;GO:0042802;GO:0070062;GO:0031012;GO:0008022;GO:0016032;GO:0005200;GO:0097110;GO:0006928;GO:0030049;GO:0003725;GO:0001948;GO:1990254	K07606-ko05206 MicroRNAs in cancer;ko05169 Epstein-Barr virus infection	-
ENSG00000228789	0.185954	8.50069	-5.51457	3.27e-06	0.000301879	down	HCG22	HLA complex group 22 [Source:HGNC Symbol;Acc:HGNC:27780]	-	-	-
ENSG00000012223	15.9386	833.496	-5.70858	0.000709677	0.0180424	down	LTF	lactotransferrin [Source:HGNC Symbol;Acc:HGNC:6720]	GO:0005737;GO:2000117;GO:0008233;GO:0004869;GO:0005615;GO:0006508;GO:0004252;GO:0005576;GO:0005515;GO:0005506;GO:0006811;GO:0006355;GO:0006351;GO:0003677;GO:0016787;GO:0046872;GO:0005634;GO:0006810;GO:0008236;GO:0002376;GO:0042742;GO:0008201;GO:0070062;GO:0044267;GO:0001895;GO:0001817;GO:0060349;GO:0002227;GO:0019731;GO:0043312;GO:0043123;GO:0019732;GO:0001503;GO:0042581;GO:0043066;GO:0051092;GO:…	-	-
ENSG00000186832	959.209	73.7913	3.70032	1.62e-07	2.45e-05	up	KRT16	keratin 16 [Source:HGNC Symbol;Acc:HGNC:6423]	GO:0005882;GO:0061436;GO:0051546;GO:0045104;GO:0045087;GO:0031424;GO:0030216;GO:0006954;GO:0002009;GO:0005200;GO:0005198;GO:0005634;GO:0005856;GO:0007010;GO:0005829;GO:0070062;GO:0005515;GO:0008283;GO:0030336;GO:0008544;GO:0070268;GO:0007568;GO:0042633	-	-
ENSG00000131737	8.55342	0.466917	4.19526	0.00037617	0.0114352	up	KRT34	keratin 34 [Source:HGNC Symbol;Acc:HGNC:6452]	GO:0005882;GO:0005198;GO:0005615;GO:0005829;GO:0070062;GO:0031424;GO:0008544;GO:0070268	-	-
ENSG00000164128	0.084402	5.20165	-5.94555	4.22e-10	1.67e-07	down	NPY1R	neuropeptide Y receptor Y1 [Source:HGNC Symbol;Acc:HGNC:7956]	GO:0040014;GO:0019233;GO:0008217;GO:0007631;GO:0007626;GO:0006006;GO:0004983;GO:0001602;GO:0001601;GO:0007165;GO:0004871;GO:0005515;GO:0005886;GO:0007186;GO:0004930;GO:0016021;GO:0016020;GO:0007218;GO:0005887;GO:0007268;GO:0003151;GO:0007187;GO:0007193;GO:0008015	K04204-ko04024 cAMP signaling pathway;ko04080 Neuroactive ligand-receptor interaction;ko04923 Regulation of lipolysis in adipocyte	KOG3656-FOG: 7 transmembrane receptor[R]
ENSG00000198648	11.8369	32.8034	-1.47056	0.00130771	0.0285186	down	STK39	serine/threonine kinase 39 [Source:HGNC Symbol;Acc:HGNC:17717]	GO:0019898;GO:0016324;GO:0016323;GO:0016020;GO:0005856;GO:0005829;GO:0005737;GO:2000687;GO:2000681;GO:2000021;GO:1901380;GO:1901017;GO:0090188;GO:0071476;GO:0050727;GO:0046777;GO:0043268;GO:0036438;GO:0035556;GO:0032414;GO:0018107;GO:0008217;GO:0006468;GO:0001933;GO:0019901;GO:0016301;GO:0004674;GO:0004672;GO:0005515;GO:0016310;GO:0016740;GO:0005654;GO:0005524;GO:0000166;GO:0043231;GO:0005634;GO:…	-	KOG0582-Ste20-like serine/threonine protein kinase[T]
ENSG00000198643	51.5399	470.455	-3.1903	4.13e-06	0.000357433	down	FAM3D	family with sequence similarity 3 member D [Source:HGNC Symbol;Acc:HGNC:18665]	GO:0005576;GO:0016021;GO:0016020;GO:0005125;GO:0046676	-	-
ENSG00000136688	97.428	0.289376	8.39525	2.93e-16	4.41e-13	up	IL36G	interleukin 36, gamma [Source:HGNC Symbol;Acc:HGNC:15741]	GO:0006955;GO:0005576;GO:0005615;GO:0006954;GO:0005125;GO:0005149;GO:0002376;GO:0045087;GO:0019221;GO:0007267	-	-
ENSG00000215559	1.39515	73.8836	-5.72676	5.5e-09	1.42e-06	down	ANKRD20A11P	ankyrin repeat domain 20 family member A11, pseudogene [Source:HGNC Symbol;Acc:HGNC:42024]	-	-	-
ENSG00000138496	97.5386	20.5529	2.24663	0.0023396	0.0433628	up	PARP9	poly(ADP-ribose) polymerase family member 9 [Source:HGNC Symbol;Acc:HGNC:24118]	GO:0005829;GO:0005739;GO:0016740;GO:0005654;GO:0016020;GO:0005737;GO:0005634;GO:0003950;GO:0006281;GO:0006974;GO:0005515;GO:0016477;GO:0006302;GO:0034356;GO:0060330	-	KOG2633-Hismacro and SEC14 domain-containing proteins[BK]
ENSG00000224660	4.0091	9.65607	-1.26816	0.00253324	0.0458268	down	SH3BP5-AS1	SH3BP5 antisense RNA 1 [Source:HGNC Symbol;Acc:HGNC:44501]	-	-	-
ENSG00000124107	788.545	6995	-3.14906	5.43e-05	0.00257512	down	SLPI	secretory leukocyte peptidase inhibitor [Source:HGNC Symbol;Acc:HGNC:11092]	GO:0005615;GO:0045087;GO:0032496;GO:0019731;GO:0006955;GO:0005576;GO:0005515;GO:0005794;GO:0002376;GO:0030414;GO:0010466;GO:0042742;GO:0004866;GO:0010951;GO:0070062;GO:0045071;GO:0004867;GO:0031012;GO:0043312;GO:0019899;GO:0035580;GO:0032091	-	-
ENSG00000160932	462.233	121.612	1.92634	6.07e-05	0.00282291	up	LY6E	lymphocyte antigen 6 family member E [Source:HGNC Symbol;Acc:HGNC:6727]	GO:0005886;GO:0016020;GO:0031225;GO:0005576;GO:0006501;GO:0005887;GO:0007166	-	-
ENSG00000013297	1.50046	10.8	-2.84755	1.29e-05	0.00082369	down	CLDN11	claudin 11 [Source:HGNC Symbol;Acc:HGNC:8514]	GO:0045178;GO:0043209;GO:0005923;GO:0008366;GO:0007283;GO:0007155;GO:0005886;GO:0005198;GO:0016021;GO:0016020;GO:0030054;GO:0005515;GO:0070062;GO:0042802;GO:0016338	K06087-ko04514 Cell adhesion molecules (CAMs);ko04530 Tight junction;ko04670 Leukocyte transendothelial migration;ko05160 Hepatitis C	-
ENSG00000102359	8.2191	18.6449	-1.18173	0.000248215	0.00839329	down	SRPX2	sushi repeat containing protein, X-linked 2 [Source:HGNC Symbol;Acc:HGNC:30668]	GO:0097060;GO:0060076;GO:0009986;GO:0005615;GO:0090050;GO:0071625;GO:0051965;GO:0005102;GO:0005576;GO:0007155;GO:0005737;GO:0030054;GO:0045202;GO:0005515;GO:0042802;GO:0001525;GO:0016337;GO:0036458;GO:0042325;GO:0048870	-	-
ENSG00000163568	25.0844	3.98984	2.65239	0.00183376	0.0362179	up	AIM2	absent in melanoma 2 [Source:HGNC Symbol;Acc:HGNC:357]	GO:0097169;GO:0005737;GO:2001056;GO:0070269;GO:0050718;GO:0035458;GO:0032731;GO:0002230;GO:0002218;GO:0042802;GO:0003690;GO:0005515;GO:0003677;GO:0005739;GO:0005654;GO:0005829;GO:0005634;GO:0006915;GO:0002376;GO:0006954;GO:0045087;GO:0032088;GO:0006955;GO:0051092;GO:0032461;GO:0033209;GO:0035690;GO:0050702	K12966-ko04623 Cytosolic DNA-sensing pathway	-
ENSG00000016602	32.4649	271.37	-3.06331	0.000675743	0.0175511	down	CLCA4	chloride channel accessory 4 [Source:HGNC Symbol;Acc:HGNC:2018]	GO:0005576;GO:0006508;GO:0008233;GO:0005886;GO:0016787;GO:0046872;GO:0016021;GO:0016020;GO:0006810;GO:0008237;GO:1902476;GO:0006821;GO:0070062;GO:0034220;GO:0004222;GO:0005229;GO:0005254;GO:0005887;GO:0016324	K05030-ko04924 Renin secretion;ko04972 Pancreatic secretion	-
ENSG00000115758	182.976	29.4415	2.63573	0.000220481	0.00768204	up	ODC1	ornithine decarboxylase 1 [Source:HGNC Symbol;Acc:HGNC:8109]	GO:0048471;GO:0005829;GO:0005737;GO:0042176;GO:0033387;GO:0009446;GO:0008284;GO:0006595;GO:0001822;GO:0042803;GO:0004586;GO:0016831;GO:0005515;GO:0016829;GO:0003824;GO:0006596;GO:0005575;GO:0006521;GO:0009615	K01581-ko00330 Arginine and proline metabolism;ko00480 Glutathione metabolism	KOG0622-Ornithine decarboxylase[E]
ENSG00000186642	3.11423	10.2636	-1.72059	1e-05	0.0006873	down	PDE2A	phosphodiesterase 2A [Source:HGNC Symbol;Acc:HGNC:8777]	GO:0008152;GO:0005515;GO:0005886;GO:0042803;GO:0005739;GO:0005829;GO:0005794;GO:0007165;GO:0016787;GO:0005783;GO:0000166;GO:0046872;GO:0016020;GO:0005737;GO:0005634;GO:0030552;GO:0048471;GO:0005759;GO:0070588;GO:0008081;GO:0005262;GO:0004114;GO:0030553;GO:0000122;GO:0071260;GO:0030818;GO:0004112;GO:0004115;GO:0004118;GO:0008144;GO:0030911;GO:0047555;GO:0006198;GO:0006626;GO:0019933;GO:0019934;GO:…	K18283-ko00230 Purine metabolism;ko04022 cGMP - PKG signaling pathway;ko04925 Aldosterone synthesis and secretion;ko04740 Olfactory transduction;ko05032 Morphine addiction	KOG3689-Cyclic nucleotide phosphodiesterase[T]
ENSG00000155093	1.50803	10.3296	-2.77605	0.00139248	0.0297356	down	PTPRN2	protein tyrosine phosphatase, receptor type N2 [Source:HGNC Symbol;Acc:HGNC:9677]	GO:0004721;GO:0035335;GO:0016311;GO:0016791;GO:0006470;GO:0004725;GO:0006629;GO:0016787;GO:0016021;GO:0016020;GO:0030054;GO:0045202;GO:0031410;GO:0005886;GO:0005887;GO:0043312;GO:0030672;GO:0007269;GO:0043235;GO:0101003;GO:0030658;GO:0005001;GO:0030667;GO:0035773;GO:0043195;GO:0030141;GO:0005788;GO:0005737;GO:0034260	K07817-ko04940 Type I diabetes mellitus	KOG0793-Protein tyrosine phosphatase[T]
ENSG00000126861	0.755357	5.50378	-2.86519	0.00100889	0.0235368	down	OMG	oligodendrocyte myelin glycoprotein [Source:HGNC Symbol;Acc:HGNC:8135]	GO:0005886;GO:0007155;GO:0016020;GO:0031225;GO:0005615;GO:0007409;GO:0005578;GO:0050771	-	KOG0619-FOG: Leucine rich repeat[R]
ENSG00000171115	2.5405	8.31842	-1.7112	1.17e-05	0.000765126	down	GIMAP8	GTPase, IMAP family member 8 [Source:HGNC Symbol;Acc:HGNC:21792]	GO:0070232;GO:0005739;GO:0005829;GO:0005525;GO:0005794;GO:0005783;GO:0000166;GO:0005737	-	-
ENSG00000253706	9.00687	0.517873	4.12036	0.00167457	0.0338514	up	AC011632.1	-	-	-	-
ENSG00000232445	14.4396	1.9709	2.87311	1.91e-05	0.00112263	up	AC006329.1	-	-	-	-
ENSG00000073792	51.7467	7.80702	2.72862	8.88e-06	0.000628543	up	IGF2BP2	insulin like growth factor 2 mRNA binding protein 2 [Source:HGNC Symbol;Acc:HGNC:28867]	GO:0005515;GO:0005829;GO:0005737;GO:0005634;GO:0051028;GO:0006810;GO:0003729;GO:0003723;GO:0003676;GO:0043488;GO:0006417;GO:0017148;GO:0003730;GO:0045182;GO:0048027;GO:0009653;GO:0042035;GO:0005856	-	KOG2193-IGF-II mRNA-binding protein IMP, contains RRM and KH domains[AR]
ENSG00000175806	3.25211	9.47603	-1.54291	0.000684969	0.0177136	down	MSRA	methionine sulfoxide reductase A [Source:HGNC Symbol;Acc:HGNC:7377]	GO:0005739;GO:0005737;GO:0008113;GO:0015629;GO:0055114;GO:0016491;GO:0005654;GO:0005829;GO:0016020;GO:0005634;GO:0070062;GO:0006979;GO:0006464;GO:0030091;GO:0006555	-	KOG1635-Peptide methionine sulfoxide reductase[O]
ENSG00000170323	0.367959	5.01996	-3.77006	2.43e-06	0.00023787	down	FABP4	fatty acid binding protein 4 [Source:HGNC Symbol;Acc:HGNC:3559]	GO:0071356;GO:0071285;GO:0050873;GO:0050872;GO:0050729;GO:0045892;GO:0042632;GO:0006469;GO:0001816;GO:0008289;GO:0005215;GO:0006810;GO:0005737;GO:0005634;GO:0050727;GO:0005829;GO:0070062;GO:0019433;GO:0005504;GO:0005811	K08753-ko04923 Regulation of lipolysis in adipocyte;ko03320 PPAR signaling pathway	KOG4015-Fatty acid-binding protein FABP[I]
ENSG00000111077	13.1853	36.0902	-1.45268	0.000179824	0.00663796	down	TNS2	tensin 2 [Source:HGNC Symbol;Acc:HGNC:19737]	GO:0005515;GO:0004721;GO:0005886;GO:0035556;GO:0016787;GO:0005622;GO:0046872;GO:0016020;GO:0030054;GO:0006470;GO:0005925;GO:0008285;GO:0019900;GO:0048871;GO:0035264;GO:0032963;GO:0019725;GO:0014850;GO:0001822	-	KOG1930-Focal adhesion protein Tensin, contains PTB domain[TZ]
ENSG00000074047	10.5814	1.82899	2.53241	0.00114722	0.0259346	up	GLI2	GLI family zinc finger 2 [Source:HGNC Symbol;Acc:HGNC:4318]	GO:0097542;GO:0031514;GO:0016607;GO:0016020;GO:0005930;GO:0005929;GO:0005737;GO:0005634;GO:0090103;GO:0071407;GO:0060831;GO:0060603;GO:0060513;GO:0060322;GO:0060032;GO:0048856;GO:0048754;GO:0048666;GO:0048646;GO:0048589;GO:0048566;GO:0045944;GO:0045893;GO:0045666;GO:0043066;GO:0042733;GO:0042475;GO:0035295;GO:0032331;GO:0030902;GO:0030879;GO:0030324;GO:0030154;GO:0021983;GO:0021965;GO:0021938;GO:…	K16798-ko04340 Hedgehog signaling pathway;ko04390 Hippo signaling pathway;ko05200 Pathways in cancer;ko05217 Basal cell carcinoma	KOG1721-FOG: Zn-finger[R]
ENSG00000260027	27.7061	2.106	3.71762	2.22e-06	0.000224264	up	HOXB7	homeobox B7 [Source:HGNC Symbol;Acc:HGNC:5118]	GO:0090190;GO:0048704;GO:0030099;GO:0009952;GO:0003677;GO:0016604;GO:0005515;GO:0043565;GO:0003700;GO:0006355;GO:0006351;GO:0006366;GO:0005654;GO:0005829;GO:0005634;GO:0007275;GO:0000978;GO:0001077;GO:0045944	-	KOG0489-Transcription factor zerknullt and related HOX domain proteins[R]
ENSG00000239213	17.3945	3.49512	2.31522	0.000298184	0.00972885	up	NCK1-AS1	NCK1 antisense RNA 1 (head to head) [Source:HGNC Symbol;Acc:HGNC:49645]	-	-	-
ENSG00000184979	32.9125	4.03903	3.02656	3.29e-06	0.00030256	up	USP18	ubiquitin specific peptidase 18 [Source:HGNC Symbol;Acc:HGNC:12616]	GO:0006508;GO:0008234;GO:0008233;GO:0005515;GO:0016787;GO:0016579;GO:0005829;GO:0005737;GO:0005634;GO:0036459;GO:0006511;GO:0004843;GO:0060338;GO:0019785	-	KOG1863-Ubiquitin carboxyl-terminal hydrolase[O]
ENSG00000247982	0.950365	6.68556	-2.8145	0.000299026	0.00972885	down	LINC00926	long intergenic non-protein coding RNA 926 [Source:HGNC Symbol;Acc:HGNC:27514]	-	-	-
ENSG00000125813	0.252299	26.0159	-6.68811	0.000115972	0.00468479	down	PAX1	paired box 1 [Source:HGNC Symbol;Acc:HGNC:8615]	GO:0061056;GO:0060349;GO:0060017;GO:0048538;GO:0045944;GO:0043374;GO:0043367;GO:0008283;GO:0007389;GO:0001756;GO:0001501;GO:0001077;GO:0000978;GO:0006355;GO:0006351;GO:0003700;GO:0003677;GO:0005634;GO:0007275;GO:0006366	-	KOG3517-Transcription factor PAX1/9[K]
ENSG00000159214	27.9513	5.57324	2.32633	0.000524306	0.0147989	up	CCDC24	coiled-coil domain containing 24 [Source:HGNC Symbol;Acc:HGNC:28688]	GO:0005515	-	-
ENSG00000159212	0.557199	8.53655	-3.93739	4.09e-07	5.53e-05	down	CLIC6	chloride intracellular channel 6 [Source:HGNC Symbol;Acc:HGNC:2065]	GO:0005886;GO:0034765;GO:0006811;GO:0005244;GO:0016021;GO:0016020;GO:0005737;GO:0006810;GO:0005254;GO:0006821;GO:0034707;GO:1902476;GO:0070062	-	KOG1422-Intracellular Cl- channel CLIC, contains GST domain[P]
ENSG00000232931	3.25847	9.27899	-1.50977	0.00184235	0.036328	down	LINC00342	long intergenic non-protein coding RNA 342 [Source:HGNC Symbol;Acc:HGNC:42470]	-	-	-
ENSG00000204866	6.85243	0.178472	5.26285	2.41e-08	4.79e-06	up	IGFL2	IGF like family member 2 [Source:HGNC Symbol;Acc:HGNC:32929]	GO:0005576	-	-
ENSG00000177685	7.0782	51.8005	-2.87151	9.59e-06	0.000668103	down	CRACR2B	calcium release activated channel regulator 2B [Source:HGNC Symbol;Acc:HGNC:28703]	GO:0005509;GO:0005515;GO:0002115;GO:0005737;GO:2001256;GO:0034613	-	-
ENSG00000095713	0.586216	12.5498	-4.42008	3.43e-06	0.000307276	down	CRTAC1	cartilage acidic protein 1 [Source:HGNC Symbol;Acc:HGNC:14882]	GO:0030426;GO:1900121;GO:0021772;GO:0007413;GO:0005576;GO:0005515;GO:0005509;GO:0005578;GO:0070062	-	-
ENSG00000249395	23.2426	1.63656	3.82803	7.45e-05	0.00326846	up	CASC9	cancer susceptibility 9 (non-protein coding) [Source:HGNC Symbol;Acc:HGNC:48906]	-	-	-
ENSG00000276855	1.11623	7.12381	-2.67401	0.00137021	0.0294546	down	AC015922.4	-	-	-	-
ENSG00000145423	36.4186	276.646	-2.9253	6.75e-08	1.2e-05	down	SFRP2	secreted frizzled related protein 2 [Source:HGNC Symbol;Acc:HGNC:10777]	GO:0005615;GO:2000041;GO:2000035;GO:1904956;GO:1902042;GO:0090263;GO:0090244;GO:0090179;GO:0090175;GO:0090090;GO:0071481;GO:0071425;GO:0061185;GO:0061056;GO:0060028;GO:0060349;GO:0051216;GO:0050732;GO:0048546;GO:0046546;GO:0045944;GO:0045766;GO:0045669;GO:0043508;GO:0043154;GO:0042981;GO:0042662;GO:0042733;GO:0042127;GO:0042493;GO:0036342;GO:0035413;GO:0033138;GO:0031668;GO:0030514;GO:0030336;GO:…	K02176-ko04310 Wnt signaling pathway	KOG3577-Smoothened and related G-protein-coupled receptors[T]
ENSG00000075618	362.383	83.8237	2.11208	0.000145889	0.00565607	up	FSCN1	fascin actin-bundling protein 1 [Source:HGNC Symbol;Acc:HGNC:11148]	GO:0043209;GO:0030426;GO:0030175;GO:0030027;GO:0051017;GO:0016477;GO:0051015;GO:0008144;GO:0003779;GO:0005515;GO:0030036;GO:0005829;GO:0007015;GO:0005737;GO:0003723;GO:0030054;GO:0005856;GO:0042995;GO:0030674;GO:0045296;GO:0070062;GO:0032956;GO:0002102;GO:0001726;GO:0071437;GO:0005902;GO:0031941;GO:0015629;GO:0051491;GO:0008283;GO:0007043;GO:0005911;GO:0032534;GO:0009653;GO:0010592;GO:0030035;GO:…	-	-
ENSG00000143147	9.35593	1.36663	2.77526	0.00041244	0.0122591	up	GPR161	G protein-coupled receptor 161 [Source:HGNC Symbol;Acc:HGNC:23694]	GO:0007165;GO:0004871;GO:0005886;GO:0007186;GO:0004930;GO:0016021;GO:0016020;GO:0007275;GO:0042995;GO:0005929;GO:0055037;GO:0060170;GO:0030666;GO:0030819;GO:1901621	K08439-ko04340 Hedgehog signaling pathway	KOG3656-FOG: 7 transmembrane receptor[R]
ENSG00000226145	63.8529	2.849	4.48622	6.81e-10	2.38e-07	up	KRT16P6	keratin 16 pseudogene 6 [Source:HGNC Symbol;Acc:HGNC:50719]	-	-	-
ENSG00000165704	59.4743	16.3511	1.86288	0.000804092	0.0198354	up	HPRT1	hypoxanthine phosphoribosyltransferase 1 [Source:HGNC Symbol;Acc:HGNC:5157]	GO:0005737;GO:0048813;GO:0046651;GO:0046100;GO:0046083;GO:0045964;GO:0042417;GO:0021954;GO:0021895;GO:0021756;GO:0019835;GO:0007626;GO:0007625;GO:0006178;GO:0006168;GO:0001975;GO:0006166;GO:0004422;GO:0042802;GO:0005515;GO:0042803;GO:0016757;GO:0009116;GO:0016740;GO:0005829;GO:0000166;GO:0046872;GO:0000287;GO:0006164;GO:0070062;GO:0051289;GO:0043101;GO:0052657;GO:0032264;GO:0043103;GO:0046038;GO:…	K00760-ko00230 Purine metabolism;ko00983 Drug metabolism - other enzymes	KOG3367-Hypoxanthine-guanine phosphoribosyltransferase[F]
ENSG00000197446	1.89443	12.5601	-2.72902	0.00122602	0.0271801	down	CYP2F1	cytochrome P450 family 2 subfamily F member 1 [Source:HGNC Symbol;Acc:HGNC:2632]	GO:0018979;GO:0018931;GO:0009636;GO:0004497;GO:0016705;GO:0005506;GO:0043231;GO:0005789;GO:0031090;GO:0005783;GO:0055114;GO:0016491;GO:0046872;GO:0016020;GO:0020037;GO:0008392;GO:0019373;GO:0070330;GO:0019825;GO:0006805;GO:0016712	K07416-ko00980 Metabolism of xenobiotics by cytochrome P450	KOG0156-Cytochrome P450 CYP2 subfamily[Q]
ENSG00000059378	49.5449	15.1784	1.70672	0.00135538	0.0291645	up	PARP12	poly(ADP-ribose) polymerase family member 12 [Source:HGNC Symbol;Acc:HGNC:21919]	GO:0046872;GO:0016740;GO:0005634;GO:0003723;GO:0003950;GO:0016757	-	-
ENSG00000001460	17.8896	5.8072	1.62321	0.00131368	0.0286228	up	STPG1	sperm tail PG-rich repeat containing 1 [Source:HGNC Symbol;Acc:HGNC:28070]	GO:0005737;GO:0005634;GO:0006915	-	-
ENSG00000123136	110.981	33.4344	1.7309	0.00144145	0.0301776	up	DDX39A	DExD-box helicase 39A [Source:HGNC Symbol;Acc:HGNC:17821]	GO:0005515;GO:0004386;GO:0016787;GO:0005524;GO:0000166;GO:0016020;GO:0016607;GO:0005737;GO:0005634;GO:0008380;GO:0006397;GO:0003723;GO:0003676;GO:0006406;GO:0042802;GO:0004004;GO:0010501;GO:0005654;GO:0005681;GO:0016887;GO:0000398;GO:0006369;GO:0006405;GO:0006974;GO:0010468;GO:0031124	-	KOG0329-ATP-dependent RNA helicase[A]
ENSG00000170779	49.838	14.3929	1.79189	0.00180834	0.0358925	up	CDCA4	cell division cycle associated 4 [Source:HGNC Symbol;Acc:HGNC:14625]	GO:0005634;GO:0005515;GO:0005886;GO:0051301;GO:0005654;GO:0005829	-	-
ENSG00000118849	4.03431	24.1466	-2.58143	3.93e-05	0.00198396	down	RARRES1	retinoic acid receptor responder 1 [Source:HGNC Symbol;Acc:HGNC:9867]	GO:0016021;GO:0016020;GO:0008285;GO:0070062	-	-
ENSG00000020256	37.6083	11.8236	1.66939	0.00183305	0.0362179	up	ZFP64	ZFP64 zinc finger protein [Source:HGNC Symbol;Acc:HGNC:15940]	GO:0005515;GO:0006355;GO:0006351;GO:0003677;GO:0046872;GO:0005634;GO:0003676	-	KOG1721-FOG: Zn-finger[R]
ENSG00000258818	2.42679	15.5013	-2.67527	2.23e-06	0.000224528	down	RNASE4	ribonuclease A family member 4 [Source:HGNC Symbol;Acc:HGNC:10047]	GO:0005576;GO:0090305;GO:0016787;GO:0003676;GO:0004519;GO:0090502;GO:0004518;GO:0070062;GO:0006379;GO:0004522;GO:0004540	-	-
ENSG00000118785	82.4962	9.22707	3.16038	1.1e-05	0.000729774	up	SPP1	secreted phosphoprotein 1 [Source:HGNC Symbol;Acc:HGNC:11255]	GO:2000866;GO:0071394;GO:0006710;GO:0045893;GO:0005576;GO:0005515;GO:0007155;GO:0005794;GO:0005125;GO:0005615;GO:0001503;GO:0070062;GO:0031214;GO:0044267;GO:0030198;GO:0005788;GO:0022617;GO:0033280;GO:0046697;GO:0043687;GO:0007566;GO:0050840;GO:0001649;GO:0045780;GO:0048471;GO:0042995;GO:0031982;GO:0048685;GO:0048545;GO:0030154;GO:0010033;GO:0006954	K06250-ko04151 PI3K-Akt signaling pathway;ko04512 ECM-receptor interaction;ko04510 Focal adhesion;ko04620 Toll-like receptor signaling pathway	-
ENSG00000158163	8.39555	1.84022	2.18975	0.00172296	0.0345395	up	DZIP1L	DAZ interacting zinc finger protein 1 like [Source:HGNC Symbol;Acc:HGNC:26551]	GO:0005515;GO:0046872;GO:0005737;GO:0003676;GO:0005856;GO:0042995;GO:0005929;GO:0060271;GO:0005814;GO:0036064	-	-
ENSG00000167748	11.7563	1.98927	2.56312	0.00103654	0.0239958	up	KLK1	kallikrein 1 [Source:HGNC Symbol;Acc:HGNC:6357]	GO:0004252;GO:0006508;GO:0008233;GO:0016787;GO:0005634;GO:0008236;GO:0070062	K01325-ko04614 Renin-angiotensin system;ko04961 Endocrine and other factor-regulated calcium reabsorption	KOG3627-Trypsin[E]
ENSG00000135446	110.19	36.875	1.57928	0.00159263	0.0324674	up	CDK4	cyclin dependent kinase 4 [Source:HGNC Symbol;Acc:HGNC:1773]	GO:0016310;GO:0016301;GO:0006468;GO:0005524;GO:0004672;GO:0004674;GO:0000166;GO:0097129;GO:0005923;GO:0043234;GO:0048471;GO:0005737;GO:0005667;GO:0005634;GO:1904637;GO:0000307;GO:1904628;GO:0071353;GO:0071222;GO:0060612;GO:0055093;GO:0051726;GO:0050994;GO:0046890;GO:0046626;GO:0045727;GO:0045793;GO:0043065;GO:0042127;GO:0040014;GO:0033574;GO:0032869;GO:0031100;GO:0010288;GO:0009636;GO:0010033;GO:…	K02089-ko04151 PI3K-Akt signaling pathway;ko04110 Cell cycle;ko04115 p53 signaling pathway;ko04530 Tight junction;ko04660 T cell receptor signaling pathway;ko05200 Pathways in cancer;ko05203 Viral carcinogenesis;ko05212 Pancreatic cancer;ko05214 Glioma;ko05220 Chronic myeloid leukemia;ko05218 Melanoma;ko05219 Bladder cancer;ko05224 Breast cancer;ko05222 Small cell lung cancer;ko05223 Non-small ce…	KOG0594-Protein kinase PCTAIRE and related kinases[R]
ENSG00000188089	17.9959	0.501221	5.16608	7.78e-20	1.87e-16	up	PLA2G4E	phospholipase A2 group IVE [Source:HGNC Symbol;Acc:HGNC:24791]	GO:0005737;GO:0004623;GO:0005829;GO:0016042;GO:0009395;GO:0008152;GO:0006629;GO:0004620;GO:0005765;GO:0016787;GO:0046872;GO:0016020;GO:0005764;GO:0036149;GO:0036150;GO:0036151;GO:0036152;GO:0004622;GO:0008970;GO:0006644	-	-
ENSG00000124102	2239.28	272.391	3.03929	4.87e-06	0.00039874	up	PI3	peptidase inhibitor 3 [Source:HGNC Symbol;Acc:HGNC:8947]	GO:0001533;GO:0098773;GO:0018149;GO:0030280;GO:0005576;GO:0010951;GO:0030414;GO:0010466;GO:0005829;GO:0070062;GO:0004867;GO:0019730;GO:0005578;GO:0004866;GO:0070268;GO:0007620	-	-
ENSG00000173727	36.5352	5.47278	2.73894	0.00137444	0.0294929	up	AP000769.1	-	-	-	-
ENSG00000100234	20.0323	77.4023	-1.95005	0.000632074	0.0168339	down	TIMP3	TIMP metallopeptidase inhibitor 3 [Source:HGNC Symbol;Acc:HGNC:11822]	GO:0005615;GO:0005604;GO:1904684;GO:0071310;GO:0005576;GO:0005515;GO:0046872;GO:0005634;GO:0005578;GO:0050896;GO:0030414;GO:0010466;GO:0008191;GO:0070062;GO:0007601;GO:0031012;GO:0002576;GO:0070373;GO:0004857;GO:0002020;GO:0031089;GO:0010033;GO:0051045;GO:1903984	K16866-ko05206 MicroRNAs in cancer;ko05205 Proteoglycans in cancer	KOG4745-Metalloproteinase inhibitor TIMP and related proteins[R]
ENSG00000112936	0.269425	13.012	-5.59382	9.75e-24	7.82e-20	down	C7	complement C7 [Source:HGNC Symbol;Acc:HGNC:1346]	GO:0006883;GO:0006955;GO:0005576;GO:0002376;GO:0045087;GO:0070062;GO:0005579;GO:0006958;GO:0006956;GO:0006957;GO:0030449;GO:0019835	K03996-ko04610 Complement and coagulation cascades;ko05322 Systemic lupus erythematosus;ko05020 Prion diseases	-
ENSG00000143476	12.4735	2.92207	2.0938	0.000129726	0.00511175	up	DTL	denticleless E3 ubiquitin protein ligase homolog [Source:HGNC Symbol;Acc:HGNC:30288]	GO:0005515;GO:0005694;GO:0016567;GO:0005829;GO:0005730;GO:0005634;GO:0016020;GO:0005737;GO:0006511;GO:0006974;GO:0005856;GO:0006260;GO:0005813;GO:0005815;GO:0005654;GO:0031965;GO:0004842;GO:0009411;GO:0051726;GO:0031572;GO:0000209;GO:0006513;GO:0043687;GO:0042769;GO:0019985;GO:0031464;GO:0031465	-	KOG0321-WD40 repeat-containing protein L2DTL[S]
ENSG00000183072	6.20559	0.0492857	6.97626	3.8e-09	1.05e-06	up	NKX2-5	NK2 homeobox 5 [Source:HGNC Symbol;Acc:HGNC:2488]	GO:0005737;GO:0005667;GO:1903779;GO:0005634;GO:0090090;GO:0072358;GO:0060971;GO:0060929;GO:0060928;GO:0060347;GO:0060261;GO:0060070;GO:0060048;GO:0060047;GO:0060043;GO:0060038;GO:0060037;GO:0055117;GO:0055007;GO:0055005;GO:0051891;GO:0048536;GO:0048738;GO:0045944;GO:0045893;GO:0045823;GO:0045214;GO:0043066;GO:0035050;GO:0030878;GO:0030509;GO:0030154;GO:0030097;GO:0010765;GO:0010735;GO:0010667;GO:…	-	KOG0842-Transcription factor tinman/NKX2-3, contains HOX domain[K]
ENSG00000149260	8.42442	28.2199	-1.74406	4.44e-05	0.00219426	down	CAPN5	calpain 5 [Source:HGNC Symbol;Acc:HGNC:1482]	GO:0006508;GO:0008234;GO:0008233;GO:0005622;GO:0016787;GO:0004198;GO:0005925;GO:0005737;GO:0070062;GO:0007165;GO:0009986	-	KOG0045-Cytosolic Ca2+-dependent cysteine protease (calpain), large subunit (EF-Hand protein superfamily)[OT]
ENSG00000005249	1.36689	5.88287	-2.10562	3.83e-05	0.00194331	down	PRKAR2B	protein kinase cAMP-dependent type II regulatory subunit beta [Source:HGNC Symbol;Acc:HGNC:9392]	GO:0097546;GO:0098794;GO:0048471;GO:0045121;GO:0043025;GO:0043197;GO:0043198;GO:0030425;GO:0005952;GO:0005743;GO:0005737;GO:0097338;GO:0045859;GO:0097332;GO:0007612;GO:0006631;GO:0030552;GO:0019904;GO:0019901;GO:0008603;GO:0005515;GO:0005886;GO:0016310;GO:0016301;GO:0000166;GO:0016020;GO:0001932;GO:0005813;GO:0005829;GO:0070062;GO:0031625;GO:0000086;GO:0097711;GO:0035556;GO:0007596;GO:0003091;GO:…	K04739-ko04910 Insulin signaling pathway	KOG1113-cAMP-dependent protein kinase types I and II, regulatory subunit[T]
ENSG00000153291	1.33782	5.3137	-1.98983	0.000867178	0.0210678	down	SLC25A27	solute carrier family 25 member 27 [Source:HGNC Symbol;Acc:HGNC:21065]	GO:0045177;GO:0043025;GO:0005739;GO:0070997;GO:0051562;GO:0048839;GO:0046324;GO:0043066;GO:0035356;GO:0010917;GO:0008284;GO:0055085;GO:0005743;GO:0016021;GO:0016020;GO:0006810;GO:0006839;GO:0022857;GO:0015992;GO:0009409;GO:0051881;GO:0031966	-	KOG0753-Mitochondrial fatty acid anion carrier protein/Uncoupling protein[C]
ENSG00000171658	12.014	1.51009	2.992	0.00157277	0.0322264	up	NMRAL2P	NmrA like redox sensor 2, pseudogene [Source:HGNC Symbol;Acc:HGNC:52332]	-	-	-
ENSG00000183801	2.1872	5.53181	-1.33867	0.0024727	0.0450528	down	OLFML1	olfactomedin like 1 [Source:HGNC Symbol;Acc:HGNC:24473]	GO:0005576	-	KOG3545-Olfactomedin and related extracellular matrix glycoproteins[W]
ENSG00000161958	30.7069	7.31608	2.06942	6.98e-05	0.00311568	up	FGF11	fibroblast growth factor 11 [Source:HGNC Symbol;Acc:HGNC:3667]	GO:0005576;GO:0008083;GO:0007399;GO:0007165;GO:0007267	K04358-ko04014 Ras signaling pathway;ko04015 Rap1 signaling pathway;ko04010 MAPK signaling pathway;ko04151 PI3K-Akt signaling pathway;ko04810 Regulation of actin cytoskeleton;ko05200 Pathways in cancer;ko05218 Melanoma;ko05224 Breast cancer	KOG3885-Fibroblast growth factor[T]
ENSG00000171388	5.27035	0.326348	4.01342	2.39e-07	3.49e-05	up	APLN	apelin [Source:HGNC Symbol;Acc:HGNC:16665]	GO:0048471;GO:0005615;GO:0097755;GO:0051466;GO:0051461;GO:0050878;GO:0045906;GO:0045776;GO:0043576;GO:0042756;GO:0042327;GO:0031652;GO:0008284;GO:0007631;GO:0002026;GO:0031704;GO:0005576;GO:0007165;GO:0005179;GO:0001664;GO:0006955;GO:0005102;GO:0007595;GO:0023052	K05225-ko04080 Neuroactive ligand-receptor interaction	-
ENSG00000224259	101.217	30.2181	1.74397	0.00217724	0.0412426	up	LINC01133	long intergenic non-protein coding RNA 1133 [Source:HGNC Symbol;Acc:HGNC:49447]	-	-	-
ENSG00000174607	10.0617	1.75893	2.5161	0.000335711	0.010587	up	UGT8	UDP glycosyltransferase 8 [Source:HGNC Symbol;Acc:HGNC:12555]	GO:0048812;GO:0030913;GO:0007010;GO:0002175;GO:0008489;GO:0016758;GO:0008152;GO:0006629;GO:0016757;GO:0016740;GO:0016021;GO:0016020;GO:0006665;GO:0005886;GO:0006687;GO:0007417;GO:0007422;GO:0015020;GO:0043231;GO:0047263;GO:0006682	K04628-ko00565 Ether lipid metabolism;ko00600 Sphingolipid metabolism	KOG1192-UDP-glucuronosyl and UDP-glucosyl transferase[GC]
ENSG00000088325	57.8758	12.671	2.19143	1.57e-05	0.000966216	up	TPX2	TPX2, microtubule nucleation factor [Source:HGNC Symbol;Acc:HGNC:1249]	GO:0043203;GO:0005819;GO:0090307;GO:0060236;GO:0061676;GO:0019901;GO:0000278;GO:0005515;GO:0051301;GO:0005654;GO:0005737;GO:0005634;GO:0006915;GO:0007049;GO:0005856;GO:0005874;GO:0000922;GO:0005829;GO:0000086;GO:0072686;GO:0005525;GO:1901796;GO:0008283;GO:0032147;GO:0005524;GO:0015630	-	-
ENSG00000118971	91.5245	18.8236	2.28162	5.35e-06	0.000433752	up	CCND2	cyclin D2 [Source:HGNC Symbol;Acc:HGNC:1583]	GO:0097129;GO:0005737;GO:0005634;GO:0071481;GO:0051726;GO:0008344;GO:0007616;GO:0005515;GO:0005829;GO:0051301;GO:0005654;GO:0016020;GO:0007049;GO:0005730;GO:0008284;GO:0043066;GO:0031965;GO:0000785;GO:0001934;GO:0019901;GO:0000307;GO:0045737;GO:1900087	K10151-ko04310 Wnt signaling pathway;ko04340 Hedgehog signaling pathway;ko04390 Hippo signaling pathway;ko04630 Jak-STAT signaling pathway;ko04068 FoxO signaling pathway;ko04151 PI3K-Akt signaling pathway;ko04110 Cell cycle;ko04115 p53 signaling pathway;ko04510 Focal adhesion;ko04917 Prolactin signaling pathway;ko05202 Transcriptional misregulation in cancers;ko05206 MicroRNAs in cancer;ko05203 V…	KOG0656-G1/S-specific cyclin D[D]
ENSG00000024526	8.3335	2.53507	1.7169	0.0022147	0.0417515	up	DEPDC1	DEP domain containing 1 [Source:HGNC Symbol;Acc:HGNC:22949]	GO:0043547;GO:0006355;GO:0006351;GO:0007165;GO:0035556;GO:0005634;GO:0005096;GO:0005515;GO:0045892;GO:0017053	-	-
ENSG00000146477	0.609999	6.60462	-3.4366	1.9e-06	0.000200434	down	SLC22A3	solute carrier family 22 member 3 [Source:HGNC Symbol;Acc:HGNC:10967]	GO:0051615;GO:0051608;GO:0032098;GO:0015872;GO:0015844;GO:0015697;GO:0015695;GO:0019534;GO:0015651;GO:0015101;GO:0005329;GO:0005515;GO:0006811;GO:0055085;GO:0005215;GO:0016021;GO:0016020;GO:0006810;GO:0005886;GO:0015711;GO:0072488;GO:0008514;GO:0005887;GO:1901998;GO:0006855	K08200-ko05231 Choline metabolism in cancer	-
ENSG00000134243	9.28244	32.2016	-1.79455	8.03e-05	0.00347749	down	SORT1	sortilin 1 [Source:HGNC Symbol;Acc:HGNC:11186]	GO:0043231;GO:0043025;GO:0030659;GO:0030425;GO:0030140;GO:0016021;GO:0005886;GO:1904037;GO:0046323;GO:0045599;GO:0032868;GO:0016050;GO:0014902;GO:0006897;GO:0005515;GO:0005765;GO:0005794;GO:0005789;GO:0005783;GO:0005829;GO:0016020;GO:0005634;GO:0006810;GO:0007275;GO:0030154;GO:0005764;GO:0005768;GO:0032580;GO:0010008;GO:0001503;GO:0009986;GO:0031965;GO:0048471;GO:0031410;GO:0019899;GO:0005769;GO:…	K12388-ko04142 Lysosome;ko04722 Neurotrophin signaling pathway	-
ENSG00000122707	2.33304	7.86039	-1.75239	0.000185889	0.00678099	down	RECK	reversion inducing cysteine rich protein with kazal motifs [Source:HGNC Symbol;Acc:HGNC:11345]	GO:1904684;GO:0035115;GO:0030198;GO:0007566;GO:0001955;GO:0004866;GO:0005515;GO:0005886;GO:0016020;GO:0031225;GO:0005576;GO:0030414;GO:0010466;GO:0006501;GO:0004867;GO:0030336;GO:0008191	K17461-ko05206 MicroRNAs in cancer	KOG3649-FOG: Kazal-type serine protease inhibitor domain[R]
ENSG00000276409	4.3955	45.6787	-3.37742	7.46e-09	1.8e-06	down	CCL14	C-C motif chemokine ligand 14 [Source:HGNC Symbol;Acc:HGNC:10612]	GO:0006955;GO:0005576;GO:0005125;GO:0005615;GO:0008009;GO:0006935;GO:0060326;GO:0005623;GO:0007186;GO:0048020;GO:0002548;GO:0006954;GO:0030593;GO:0043547;GO:0048247;GO:0070098;GO:0070374;GO:0071346;GO:0071347;GO:0071356;GO:0008284;GO:0006874	-	-
ENSG00000176273	9.99349	2.35423	2.08573	0.00118092	0.0265044	up	SLC35G1	solute carrier family 35 member G1 [Source:HGNC Symbol;Acc:HGNC:26607]	GO:0005886;GO:0005789;GO:0005783;GO:0016020;GO:0016021;GO:0005515;GO:0051480;GO:1990034	-	KOG4510-Permease of the drug/metabolite transporter (DMT) superfamily[R]
ENSG00000133800	1.27585	12.8425	-3.3314	1.43e-16	2.3e-13	down	LYVE1	lymphatic vessel endothelial hyaluronan receptor 1 [Source:HGNC Symbol;Acc:HGNC:14687]	GO:0071944;GO:0005886;GO:0006027;GO:0005540;GO:0004888;GO:0005515;GO:0007155;GO:0016021;GO:0016020;GO:0006810;GO:0007165;GO:0070062;GO:0005887;GO:0004872;GO:0009611;GO:0006928;GO:0009653;GO:0007160;GO:0030214	-	-
ENSG00000110104	71.1886	20.4372	1.80045	0.000696783	0.0178465	up	CCDC86	coiled-coil domain containing 86 [Source:HGNC Symbol;Acc:HGNC:28359]	GO:0005634;GO:0005515;GO:0005730;GO:0003723;GO:0016032	-	KOG4538-Predicted coiled-coil protein[R]
ENSG00000088826	32.4701	7.86928	2.04481	0.000536197	0.0149762	up	SMOX	spermine oxidase [Source:HGNC Symbol;Acc:HGNC:15862]	GO:0031965;GO:0055114;GO:0016491;GO:0005654;GO:0043231;GO:0005737;GO:0005634;GO:0005829;GO:0006596;GO:0046592;GO:0052901;GO:0046208;GO:0052894;GO:0052895;GO:0006598	K12259-ko00330 Arginine and proline metabolism;ko00410 beta-Alanine metabolism	KOG0685-Flavin-containing amine oxidase[H]
ENSG00000165621	1.28469	19.983	-3.95928	0.000732995	0.0184791	down	OXGR1	oxoglutarate receptor 1 [Source:HGNC Symbol;Acc:HGNC:4531]	GO:0007165;GO:0004871;GO:0005886;GO:0007186;GO:0004930;GO:0016021;GO:0016020	-	-
ENSG00000140092	9.76929	56.8351	-2.54046	6.56e-05	0.00298148	down	FBLN5	fibulin 5 [Source:HGNC Symbol;Acc:HGNC:3602]	GO:0005509;GO:0071953;GO:0005615;GO:0031012;GO:2000121;GO:0048251;GO:0034394;GO:0030198;GO:0001558;GO:0005178;GO:0005576;GO:0005515;GO:0042803;GO:0007155;GO:0005578;GO:0070062;GO:0007160;GO:0046903;GO:0008022	-	-
ENSG00000185038	8.26363	0.554087	3.89859	5.93e-05	0.00276735	up	MROH2A	maestro heat like repeat family member 2A [Source:HGNC Symbol;Acc:HGNC:27936]	-	-	KOG2032-Uncharacterized conserved protein[S]
ENSG00000152154	0.445585	5.42698	-3.60638	0.000192865	0.00694083	down	TMEM178A	transmembrane protein 178A [Source:HGNC Symbol;Acc:HGNC:28517]	GO:0005789;GO:0051480;GO:0045671;GO:0005783;GO:0016021;GO:0016020	-	-
ENSG00000162407	18.8255	55.2708	-1.55383	0.000389185	0.0117566	down	PLPP3	phospholipid phosphatase 3 [Source:HGNC Symbol;Acc:HGNC:9229]	GO:0005886;GO:1902068;GO:0060070;GO:0060020;GO:0051091;GO:0050821;GO:0050731;GO:0030111;GO:0016337;GO:0007155;GO:0006644;GO:0001933;GO:0001702;GO:0001568;GO:0042577;GO:0042392;GO:0005178;GO:0005515;GO:0005794;GO:0016787;GO:0016021;GO:0016020;GO:0006470;GO:0005887;GO:0070062;GO:0006629;GO:0008195;GO:0008354;GO:0030148;GO:0004721;GO:0034109;GO:0044328;GO:0044329;GO:0044330;GO:0046839;GO:0005912	K01080-ko00561 Glycerolipid metabolism;ko00564 Glycerophospholipid metabolism;ko00565 Ether lipid metabolism;ko00600 Sphingolipid metabolism;ko04072 Phospholipase D signaling pathway;ko04666 Fc gamma R-mediated phagocytosis;ko04975 Fat digestion and absorption;ko05231 Choline metabolism in cancer	KOG3030-Lipid phosphate phosphatase and related enzymes of the PAP2 family[I]
ENSG00000154080	1.03088	8.53739	-3.04992	8.1e-06	0.000587556	down	CHST9	carbohydrate sulfotransferase 9 [Source:HGNC Symbol;Acc:HGNC:19898]	GO:0001537;GO:0005576;GO:0005794;GO:0016740;GO:0016021;GO:0016020;GO:0000139;GO:0008146;GO:0016051;GO:0005975;GO:0030203;GO:0042446;GO:0030206;GO:0006790;GO:0030166;GO:0047756	K09673-ko00513 Various types of N-glycan biosynthesis	KOG4651-Chondroitin 6-sulfotransferase and related sulfotransferases[MW]
ENSG00000205221	0.60963	9.09086	-3.89841	2.54e-06	0.000246251	down	VIT	vitrin [Source:HGNC Symbol;Acc:HGNC:12697]	GO:0005614;GO:0005578;GO:0030198;GO:0010811;GO:0005539;GO:0005576	-	-
ENSG00000138135	5.11524	17.3605	-1.76294	0.000233438	0.00802892	down	CH25H	cholesterol 25-hydroxylase [Source:HGNC Symbol;Acc:HGNC:1907]	GO:0035754;GO:0008203;GO:0008395;GO:0001567;GO:0005506;GO:0006629;GO:0005789;GO:0005783;GO:0055114;GO:0016491;GO:0004497;GO:0046872;GO:0016021;GO:0016020;GO:0008202;GO:0008610;GO:0006694;GO:0016126;GO:0005829;GO:0006699	K10223-ko00120 Primary bile acid biosynthesis	KOG0873-C-4 sterol methyl oxidase[I]
ENSG00000072274	114.102	15.8437	2.84835	1.23e-06	0.000138312	up	TFRC	transferrin receptor [Source:HGNC Symbol;Acc:HGNC:11763]	GO:0005886;GO:0006879;GO:0006898;GO:0004998;GO:0033572;GO:1990712;GO:0070062;GO:0055037;GO:0048471;GO:0016020;GO:0010008;GO:0009986;GO:0009897;GO:0005905;GO:0005768;GO:0045780;GO:0030316;GO:0001948;GO:0042470;GO:0005576;GO:0005515;GO:0016021;GO:0003723;GO:0005615;GO:0042802;GO:0030890;GO:0046718;GO:0006897;GO:0061024;GO:0072562;GO:0042102;GO:0005887;GO:0016032;GO:0042803;GO:1903561;GO:0031410;GO:…	K06503-ko04066 HIF-1 signaling pathway;ko04144 Endocytosis;ko04145 Phagosome;ko04640 Hematopoietic cell lineage	KOG2195-Transferrin receptor and related proteins containing the protease-associated (PA) domain[OPR]
ENSG00000184271	2.51863	5.07857	-1.01179	0.00238443	0.0438895	down	POU6F1	POU class 6 homeobox 1 [Source:HGNC Symbol;Acc:HGNC:9224]	GO:0000977;GO:0003700;GO:0006355;GO:0006351;GO:0003677;GO:0005634;GO:0016604;GO:0015629;GO:0007420;GO:0007517;GO:0007507	-	KOG3802-Transcription factor OCT-1, contains POU and HOX domains[K]
ENSG00000168496	41.4466	8.56417	2.27487	1.24e-05	0.000801891	up	FEN1	flap structure-specific endonuclease 1 [Source:HGNC Symbol;Acc:HGNC:3650]	GO:0005634;GO:0007613;GO:0005515;GO:0090305;GO:0006281;GO:0005739;GO:0003677;GO:0003824;GO:0016787;GO:0046872;GO:0016020;GO:0016788;GO:0004518;GO:0004519;GO:0090502;GO:0004527;GO:0006974;GO:0006260;GO:0000287;GO:0005654;GO:0005730;GO:0000784;GO:0043234;GO:0004523;GO:0006284;GO:0003684;GO:0006302;GO:0045876;GO:0000724;GO:0008409;GO:0000722;GO:0003690;GO:0008309;GO:0017108;GO:0048256;GO:0009650;GO:…	K04799-ko03030 DNA replication;ko03410 Base excision repair;ko03450 Non-homologous end-joining	KOG2519-5'-3' exonuclease[L]
ENSG00000168497	4.45009	19.2953	-2.11635	5.42e-06	0.00043483	down	CAVIN2	caveolae associated protein 2 [Source:HGNC Symbol;Acc:HGNC:10690]	GO:0005515;GO:0005829;GO:0016020;GO:0005737;GO:0005901;GO:0045121;GO:0008289;GO:0001786;GO:0005543;GO:0005080	-	-
ENSG00000114948	9.91188	2.01441	2.2988	0.00195155	0.0380019	up	ADAM23	ADAM metallopeptidase domain 23 [Source:HGNC Symbol;Acc:HGNC:202]	GO:0005576;GO:0006508;GO:0005886;GO:0007155;GO:0016021;GO:0016020;GO:0004222;GO:0008237;GO:0005887;GO:0007417;GO:0005178;GO:0005515	-	KOG3607-Meltrins, fertilins and related Zn-dependent metalloproteinases of the ADAMs family[O]
ENSG00000185652	0.641954	5.16096	-3.0071	0.000182876	0.00670155	down	NTF3	neurotrophin 3 [Source:HGNC Symbol;Acc:HGNC:8023]	GO:0005576;GO:0008083;GO:0005102;GO:0050918;GO:0008284;GO:0031410;GO:0048812;GO:0007399;GO:0033138;GO:0050731;GO:2000251;GO:0007165;GO:0007267;GO:0030335;GO:0000187;GO:0042981;GO:0090630;GO:0043524;GO:0032148;GO:0002092;GO:0042056;GO:0045664;GO:0007169;GO:0005165;GO:0005166;GO:0050732;GO:0050930	K04356-ko04010 MAPK signaling pathway;ko04722 Neurotrophin signaling pathway	-
ENSG00000198734	0.734296	8.64328	-3.55714	1.01e-06	0.000118701	down	F5	coagulation factor V [Source:HGNC Symbol;Acc:HGNC:3542]	GO:0031091;GO:0005794;GO:0005783;GO:0005615;GO:0005576;GO:0032571;GO:0008015;GO:0007596;GO:0046872;GO:0016020;GO:0005507;GO:0005886;GO:0030168;GO:0000139;GO:0005515;GO:0044267;GO:0002576;GO:0007599;GO:0031093;GO:0006888;GO:1903561;GO:0048208;GO:0005788;GO:0033116;GO:0043687;GO:0030134	K03902-ko04610 Complement and coagulation cascades	-
ENSG00000198478	7.26281	51.2526	-2.81903	6.61e-06	0.00051695	down	SH3BGRL2	SH3 domain binding glutamate rich protein like 2 [Source:HGNC Symbol;Acc:HGNC:15567]	GO:0031965;GO:0005654;GO:0005634;GO:0005737;GO:0070062;GO:0017124	-	KOG4023-Uncharacterized conserved protein[S]
ENSG00000170989	5.84356	15.3948	-1.39752	0.00132038	0.0287167	down	S1PR1	sphingosine-1-phosphate receptor 1 [Source:HGNC Symbol;Acc:HGNC:3165]	GO:0009897;GO:0072678;GO:0061384;GO:0051497;GO:0051482;GO:0050927;GO:0048661;GO:0045944;GO:0045446;GO:0045124;GO:0043547;GO:0031532;GO:0030595;GO:0030500;GO:0030335;GO:0030182;GO:0030155;GO:0030032;GO:0019226;GO:0016477;GO:0008284;GO:0007420;GO:0007193;GO:0007186;GO:0006935;GO:0003376;GO:0003245;GO:0001955;GO:0001525;GO:0046625;GO:0038036;GO:0004930;GO:0007165;GO:0004871;GO:0005886;GO:0005654;GO:…	K04288-ko04068 FoxO signaling pathway;ko04071 Sphingolipid signaling pathway;ko04080 Neuroactive ligand-receptor interaction	-
ENSG00000070087	86.3596	9.5522	3.17645	2.88e-09	8.19e-07	up	PFN2	profilin 2 [Source:HGNC Symbol;Acc:HGNC:8882]	GO:0005515;GO:0030036;GO:0003779;GO:0005737;GO:0005856;GO:0030833;GO:0070062;GO:0050821;GO:0005546;GO:0016887;GO:0030838;GO:0051496;GO:0032781;GO:0003785;GO:0033138;GO:0030837;GO:0032233;GO:0010633;GO:1900028;GO:0043195;GO:2000300;GO:0016021;GO:0016020	K05759-ko04015 Rap1 signaling pathway;ko04013 MAPK signaling pathway - fly;ko04810 Regulation of actin cytoskeleton;ko05132 Salmonella infection;ko05131 Shigellosis	KOG1755-Profilin[Z]
ENSG00000070081	47.8038	169.718	-1.82794	0.000553135	0.0152546	down	NUCB2	nucleobindin 2 [Source:HGNC Symbol;Acc:HGNC:8044]	GO:0005509;GO:0005783;GO:0005737;GO:0005640;GO:0005634	-	KOG3866-DNA-binding protein of the nucleobindin family[R]
ENSG00000185442	2.92812	14.707	-2.32846	7.01e-07	8.61e-05	down	FAM174B	family with sequence similarity 174 member B [Source:HGNC Symbol;Acc:HGNC:34339]	GO:0016021;GO:0016020	-	-
ENSG00000120129	55.8544	213.52	-1.93463	0.000268053	0.0088771	down	DUSP1	dual specificity phosphatase 1 [Source:HGNC Symbol;Acc:HGNC:3064]	GO:0005634;GO:2000279;GO:0070373;GO:0051592;GO:0051591;GO:0051384;GO:0043066;GO:0043065;GO:0042542;GO:0035556;GO:0033574;GO:0032870;GO:0032526;GO:0032355;GO:0010033;GO:0009416;GO:0006470;GO:0019838;GO:0008330;GO:0017017;GO:0005515;GO:0004721;GO:0016311;GO:0016791;GO:0008138;GO:0004725;GO:0016787;GO:0005737;GO:0007049;GO:0035335;GO:0006979;GO:0042981;GO:0035970;GO:0043407;GO:0043409;GO:0004726;GO:…	-	KOG1716-Dual specificity phosphatase[V]
ENSG00000005381	0.0725297	6.90548	-6.57303	8.03e-08	1.4e-05	down	MPO	myeloperoxidase [Source:HGNC Symbol;Acc:HGNC:7218]	GO:0055114;GO:0020037;GO:0098869;GO:0006952;GO:0006979;GO:0004601;GO:0002149;GO:0005739;GO:0005615;GO:1990268;GO:0050832;GO:0044130;GO:0042744;GO:0032496;GO:0032094;GO:0019430;GO:0009612;GO:0007568;GO:0002679;GO:0001878;GO:0016491;GO:0005634;GO:0046872;GO:0043231;GO:0005764;GO:0005576;GO:0042742;GO:0070062;GO:0043312;GO:0042582;GO:0043066;GO:0035578;GO:0003682;GO:0034374;GO:0008201;GO:0030141	K10789-ko04145 Phagosome;ko05202 Transcriptional misregulation in cancers	KOG2408-Peroxidase/oxygenase[R]
ENSG00000160182	0.0001	34.85	-18.4108	8.81e-06	0.000625808	down	TFF1	trefoil factor 1 [Source:HGNC Symbol;Acc:HGNC:11755]	GO:0005615;GO:0043434;GO:0035902;GO:0030277;GO:0030154;GO:0010039;GO:0008285;GO:0005576;GO:0005515;GO:0008083;GO:0005975;GO:0007586;GO:0042060	-	-
ENSG00000137501	3.97732	10.8416	-1.4467	0.00267807	0.0478674	down	SYTL2	synaptotagmin like 2 [Source:HGNC Symbol;Acc:HGNC:15585]	GO:0006887;GO:0017137;GO:0042470;GO:0019897;GO:0016020;GO:0005886;GO:0072659;GO:0070257;GO:0042043;GO:0005515;GO:0006886;GO:0005737;GO:0005509;GO:0005544;GO:0019905;GO:0030276;GO:0006906;GO:0016192;GO:0019902;GO:0010923;GO:0005546;GO:0001786;GO:0070382;GO:0006904;GO:0005622	-	KOG1028-Ca2+-dependent phospholipid-binding protein Synaptotagmin, required for synaptic vesicle and secretory granule exocytosis[TU]
ENSG00000237575	7.3822	0.122032	5.91872	1.97e-05	0.00114955	up	PYY2	peptide YY 2 (pseudogene) [Source:HGNC Symbol;Acc:HGNC:9749]	-	-	-
ENSG00000188536	20.3951	141.319	-2.79267	0.00083525	0.0204708	down	HBA2	hemoglobin subunit alpha 2 [Source:HGNC Symbol;Acc:HGNC:4824]	GO:0005515;GO:0005506;GO:0046872;GO:0016020;GO:0006810;GO:0022627;GO:0020037;GO:0098869;GO:0006898;GO:0005576;GO:0019825;GO:0005829;GO:0005344;GO:0015671;GO:0005833;GO:0070062;GO:0072562;GO:0015701;GO:0010942;GO:0042542;GO:0031838;GO:0071682;GO:0004601;GO:0042744;GO:0031720;GO:0051291	K13822-ko05144 Malaria;ko05143 African trypanosomiasis	KOG3378-Globins and related hemoproteins[C]
ENSG00000180096	5.37739	14.0979	-1.3905	0.00102008	0.0237518	down	2020-09-01	septin 1 [Source:HGNC Symbol;Acc:HGNC:2879]	GO:0072687;GO:0030496;GO:0051311;GO:0007056;GO:0005525;GO:0000166	-	-
ENSG00000105048	35.249	2.97994	3.56423	9.16e-09	2.12e-06	up	TNNT1	troponin T1, slow skeletal type [Source:HGNC Symbol;Acc:HGNC:11948]	GO:0005515;GO:0005861;GO:0006937;GO:0005829;GO:0003009;GO:0030049;GO:0005523;GO:0045932;GO:0031444;GO:0014883;GO:0031014	-	KOG3634-Troponin[Z]
ENSG00000152931	2.88939	18.6872	-2.69321	0.00134107	0.0289802	down	PART1	prostate androgen-regulated transcript 1 (non-protein coding) [Source:HGNC Symbol;Acc:HGNC:17263]	-	-	-
ENSG00000154556	4.60584	32.3117	-2.81052	1.39e-08	3.04e-06	down	SORBS2	sorbin and SH3 domain containing 2 [Source:HGNC Symbol;Acc:HGNC:24098]	GO:0005515;GO:0005886;GO:0007155;GO:0007015;GO:0016020;GO:0005737;GO:0005634;GO:0003723;GO:0003676;GO:0048471;GO:0030054;GO:0016477;GO:0005925;GO:0042995;GO:0008150;GO:0030027;GO:0016324;GO:0005200;GO:0015629;GO:0030018;GO:0008307;GO:0008093;GO:0061049	-	-
ENSG00000127564	34.3019	8.36269	2.03625	2.4e-05	0.00133629	up	PKMYT1	protein kinase, membrane associated tyrosine/threonine 1 [Source:HGNC Symbol;Acc:HGNC:29650]	GO:0016310;GO:0016301;GO:0006468;GO:0005524;GO:0004672;GO:0000278;GO:0005515;GO:0005794;GO:0005789;GO:0005783;GO:0016740;GO:0005730;GO:0005634;GO:0004674;GO:0000166;GO:0046872;GO:0016020;GO:0000139;GO:0007049;GO:0005829;GO:0005654;GO:0000086;GO:0010923;GO:0007088;GO:0000079;GO:0051726;GO:0005737	K06633-ko04110 Cell cycle;ko04114 Oocyte meiosis;ko04914 Progesterone-mediated oocyte maturation	KOG0601-Cyclin-dependent kinase WEE1[D]
ENSG00000157601	277.806	32.0261	3.11676	1.04e-05	0.00069798	up	MX1	MX dynamin like GTPase 1 [Source:HGNC Symbol;Acc:HGNC:7532]	GO:0003924;GO:0005515;GO:0005829;GO:0005525;GO:0031965;GO:0005789;GO:0005783;GO:0000166;GO:0016020;GO:0005737;GO:0005634;GO:0048471;GO:0002376;GO:0045087;GO:0042802;GO:0051607;GO:0008017;GO:0009615;GO:0045071;GO:0007165;GO:0006915;GO:0006952;GO:0060337;GO:0003374;GO:0061025;GO:0031966;GO:0034340;GO:0000266	K14754-ko05162 Measles;ko05164 Influenza A	KOG0446-Vacuolar sorting protein VPS1, dynamin, and related proteins[UR]
ENSG00000284194	17.5999	2.74966	2.67825	0.00159027	0.0324674	up	SCO2	SCO2, cytochrome c oxidase assembly protein [Source:NCBI gene;Acc:9997]	GO:0005743;GO:0005739;GO:0045454;GO:0055114;GO:0046872;GO:0005507;GO:0005515;GO:0001654;GO:0005759;GO:0006825;GO:0006878;GO:0008535;GO:0030016	-	KOG2792-Putative cytochrome C oxidase assembly protein[C]
ENSG00000161798	2.75208	235.877	-6.42137	0.000527593	0.0148306	down	AQP5	aquaporin 5 [Source:HGNC Symbol;Acc:HGNC:638]	GO:0016324;GO:0009925;GO:0005902;GO:0005886;GO:0005783;GO:0048593;GO:0046541;GO:0015670;GO:0006833;GO:0005515;GO:0016020;GO:0005215;GO:0006810;GO:0016021;GO:0070062;GO:0005887;GO:0015250;GO:0007588;GO:0034220;GO:0042476;GO:0030157	K09867-ko04970 Salivary secretion	KOG0223-Aquaporin (major intrinsic protein family)[G]
ENSG00000134326	63.9085	2.53008	4.65875	1.03e-06	0.000120948	up	CMPK2	cytidine/uridine monophosphate kinase 2 [Source:HGNC Symbol;Acc:HGNC:27015]	GO:0071222;GO:0006233;GO:0006227;GO:0009041;GO:0004798;GO:0005739;GO:0016310;GO:0016301;GO:0016740;GO:0005524;GO:0000166;GO:0006221;GO:0004550;GO:0004127;GO:0006165;GO:0009142;GO:0006235;GO:0033862	K13809-ko00240 Pyrimidine metabolism	KOG3327-Thymidylate kinase/adenylate kinase[F]
ENSG00000134324	7.24408	30.2166	-2.06046	0.00188925	0.0371311	down	LPIN1	lipin 1 [Source:HGNC Symbol;Acc:HGNC:13345]	GO:0032869;GO:0031100;GO:0006631;GO:0016311;GO:0008195;GO:0005829;GO:0006629;GO:0006355;GO:0006351;GO:0006357;GO:0016787;GO:0005789;GO:0005783;GO:0016020;GO:0005737;GO:0005634;GO:0019432;GO:0009062;GO:0003674;GO:0045944;GO:0005654;GO:0031965;GO:0007077;GO:0003713;GO:0005635;GO:0006656;GO:0006646;GO:0006642;GO:0005741	K15728-ko00561 Glycerolipid metabolism;ko00564 Glycerophospholipid metabolism	KOG2116-Protein involved in plasmid maintenance/nuclear protein involved in lipid metabolism[NI]
ENSG00000134321	116.055	2.29873	5.65783	5.46e-09	1.42e-06	up	RSAD2	radical S-adenosyl methionine domain containing 2 [Source:HGNC Symbol;Acc:HGNC:30908]	GO:0003824;GO:0051536;GO:0005811;GO:0005783;GO:2000553;GO:0051607;GO:0045071;GO:0043367;GO:0035710;GO:0034165;GO:0034157;GO:0009615;GO:0005789;GO:0005515;GO:0005739;GO:0001650;GO:0005794;GO:0005743;GO:0046872;GO:0016020;GO:0005741;GO:0051539;GO:0002376;GO:0045087;GO:0016032;GO:0043621;GO:0060337;GO:0050709	K15045-ko05164 Influenza A	-
ENSG00000135144	2.06716	5.23159	-1.3396	0.00246295	0.0450314	down	DTX1	deltex E3 ubiquitin ligase 1 [Source:HGNC Symbol;Acc:HGNC:3060]	GO:0045581;GO:0010001;GO:0007219;GO:0016604;GO:0005515;GO:0006351;GO:0046872;GO:0016567;GO:0016740;GO:0005654;GO:0005829;GO:0008270;GO:0005737;GO:0005634;GO:1903506;GO:0031625;GO:0017124;GO:0003713;GO:0007166;GO:0006366;GO:0005112;GO:0045665;GO:0008593	K06058-ko04330 Notch signaling pathway	-
ENSG00000118193	7.33547	1.19173	2.62184	3.83e-06	0.000337418	up	KIF14	kinesin family member 14 [Source:HGNC Symbol;Acc:HGNC:19181]	GO:1903429;GO:0051301;GO:0043524;GO:0043523;GO:0031641;GO:0021987;GO:0021846;GO:0021772;GO:0021766;GO:0021695;GO:0021693;GO:0021685;GO:0016887;GO:0015631;GO:0008574;GO:0008017;GO:0005524;GO:0005515;GO:0003777;GO:0005886;GO:0005829;GO:0000166;GO:0016020;GO:0005737;GO:0005634;GO:0005856;GO:0005874;GO:0007018;GO:0005819;GO:0030496;GO:0008284;GO:0005871;GO:0001558;GO:0043066;GO:0043161;GO:0032467;GO:…	-	KOG0245-Kinesin-like protein[Z]
ENSG00000146070	7.56291	1.09984	2.78165	0.00256589	0.0462398	up	PLA2G7	phospholipase A2 group VII [Source:HGNC Symbol;Acc:HGNC:9040]	GO:0005737;GO:0005615;GO:0005576;GO:0016042;GO:0006629;GO:0016787;GO:0050729;GO:0005543;GO:0034362;GO:0034374;GO:0090026;GO:0016788;GO:0046469;GO:0003847;GO:0047499;GO:0034440;GO:0034441	K01062-ko00565 Ether lipid metabolism	KOG3847-Phospholipase A2 (platelet-activating factor acetylhydrolase in humans)[I]
ENSG00000186185	17.8967	3.30594	2.43656	3.02e-05	0.00160476	up	KIF18B	kinesin family member 18B [Source:HGNC Symbol;Acc:HGNC:27102]	GO:0016604;GO:0003777;GO:0005829;GO:0005634;GO:0005524;GO:0000166;GO:0008017;GO:0005874;GO:0003774;GO:0007018;GO:1990752;GO:0051301;GO:0005737;GO:0007049;GO:0005856;GO:0005515;GO:0000070;GO:0016887;GO:0005871;GO:0051302;GO:0019894;GO:0000278;GO:0035371;GO:0000235;GO:0007019	-	-
ENSG00000077092	1.0664	7.03719	-2.72226	3.18e-07	4.48e-05	down	RARB	retinoic acid receptor beta [Source:HGNC Symbol;Acc:HGNC:9865]	GO:0043401;GO:0003707;GO:0043565;GO:0006355;GO:0006351;GO:0003700;GO:0003677;GO:0046872;GO:0008270;GO:0005634;GO:0003708;GO:0048384;GO:0005654;GO:0005737;GO:0007165;GO:0006367;GO:0048566;GO:0061037;GO:0060348;GO:0060041;GO:0055012;GO:0048048;GO:0045944;GO:0045666;GO:0043068;GO:0043066;GO:0043065;GO:0035264;GO:0035116;GO:0032331;GO:0031641;GO:0022008;GO:0021756;GO:0008285;GO:0008284;GO:0003417;GO:…	-	KOG3575-FOG: Hormone receptors[T]
ENSG00000213088	8.03344	29.5306	-1.87812	0.000181405	0.00666795	down	ACKR1	atypical chemokine receptor 1 (Duffy blood group) [Source:HGNC Symbol;Acc:HGNC:4035]	GO:0007165;GO:0004871;GO:0016021;GO:0016020;GO:0004930;GO:0007186;GO:0006954;GO:0005886;GO:0070098;GO:0006952;GO:0019956;GO:0005768;GO:0005769;GO:0055037;GO:0004872;GO:0004888;GO:0019957;GO:0032642	K06574-ko05144 Malaria	-
ENSG00000124491	5.87438	32.8976	-2.48547	7.35e-06	0.000554319	down	F13A1	coagulation factor XIII A chain [Source:HGNC Symbol;Acc:HGNC:3531]	GO:0018149;GO:0007596;GO:0003810;GO:0005576;GO:0016746;GO:0016740;GO:0046872;GO:0005737;GO:0072562;GO:0002576;GO:0007599;GO:0031093;GO:0072378	-	-
ENSG00000157107	6.60342	18.9168	-1.51839	0.00111953	0.0254041	down	FCHO2	FCH domain only 2 [Source:HGNC Symbol;Acc:HGNC:25180]	GO:0098835;GO:0030136;GO:0005905;GO:0005886;GO:0072659;GO:0048488;GO:0010324;GO:0035091;GO:0005546;GO:0001786;GO:0005515;GO:0016020;GO:0072583;GO:0005829;GO:0006897;GO:0061024;GO:0048268	-	KOG2398-Predicted proline-serine-threonine phosphatase-interacting protein (PSTPIP)[D]
ENSG00000170465	271.274	51.2081	2.40531	0.00231016	0.0430081	up	KRT6C	keratin 6C [Source:HGNC Symbol;Acc:HGNC:20406]	GO:0005882;GO:0005515;GO:0005198;GO:0045095;GO:0005829;GO:0070062;GO:0031424;GO:0045104;GO:0070268	-	-
ENSG00000094963	4.05009	38.444	-3.24673	0.000581062	0.0158106	down	FMO2	flavin containing monooxygenase 2 [Source:HGNC Symbol;Acc:HGNC:3770]	GO:0072592;GO:0004497;GO:0043231;GO:0005789;GO:0031090;GO:0005783;GO:0055114;GO:0050661;GO:0050660;GO:0016491;GO:0004499;GO:0016021;GO:0016020;GO:0006805;GO:0017144;GO:0006082;GO:0009404;GO:0070995;GO:0006739	-	-
ENSG00000242147	6.69836	0.0983567	6.08964	4.45e-05	0.00219502	up	AL365356.5	-	-	-	-
ENSG00000106078	1.35161	7.74829	-2.5192	2.95e-05	0.0015839	down	COBL	cordon-bleu WH2 repeat protein [Source:HGNC Symbol;Acc:HGNC:22199]	GO:0003779;GO:0005886;GO:0016020;GO:0005737;GO:0005856;GO:0042995;GO:0001726;GO:0048565;GO:0048471;GO:0000578;GO:0001843;GO:0030424;GO:0030041;GO:0005884;GO:0003785;GO:0001757;GO:0001889;GO:0030903;GO:0033504;GO:0048669;GO:0051639;GO:1900006;GO:0005938;GO:0030425;GO:0043025;GO:0044294;GO:0044295;GO:1900029	-	-
ENSG00000229732	33.2274	374.546	-3.4947	4.01e-05	0.00201047	down	AC019349.1	-	-	-	-
ENSG00000184330	8.28365	0.0001	16.338	2.34e-14	2.35e-11	up	S100A7A	S100 calcium binding protein A7A [Source:HGNC Symbol;Acc:HGNC:21657]	GO:0005509;GO:0046872;GO:0005737;GO:0046914;GO:0043621	-	-
ENSG00000163017	5.4379	24.9599	-2.19849	0.000409371	0.012198	down	ACTG2	actin, gamma 2, smooth muscle, enteric [Source:HGNC Symbol;Acc:HGNC:145]	GO:0005524;GO:0000166;GO:0005737;GO:0005615;GO:0005856;GO:0005829;GO:0070062;GO:0072562;GO:0010628;GO:0090131;GO:0030027;GO:0030175;GO:0044297;GO:0006936;GO:0032982;GO:0071944	K12315-ko04270 Vascular smooth muscle contraction	KOG0676-Actin and related proteins[Z]
ENSG00000166225	12.6528	5.38205	1.23323	0.00170018	0.0341968	up	FRS2	fibroblast growth factor receptor substrate 2 [Source:HGNC Symbol;Acc:HGNC:16971]	GO:0043547;GO:0016020;GO:0007186;GO:0005158;GO:0036092;GO:0005886;GO:0046854;GO:0005887;GO:0005515;GO:0000165;GO:0012505;GO:0005913;GO:0046934;GO:0007411;GO:0014066;GO:0048015;GO:0005088;GO:0016303;GO:0008543;GO:0005104;GO:2000726;GO:0000186;GO:0005768;GO:0005168;GO:0005068;GO:0019211;GO:0007185;GO:0005911;GO:0005737;GO:0070372;GO:0070307;GO:0060527;GO:0050678;GO:0046619;GO:0042981;GO:0030900;GO:…	K12461-ko04722 Neurotrophin signaling pathway;ko05205 Proteoglycans in cancer	KOG4047-Docking protein 1 (p62dok)[T]
ENSG00000188153	36.9742	6.41146	2.5278	0.000670274	0.0175217	up	COL4A5	collagen type IV alpha 5 chain [Source:HGNC Symbol;Acc:HGNC:2207]	GO:0031594;GO:0005605;GO:0005604;GO:0005587;GO:0038063;GO:0007528;GO:0005581;GO:0005576;GO:0005578;GO:0005201;GO:0030574;GO:0030198;GO:0005788	K06237-ko04151 PI3K-Akt signaling pathway;ko04512 ECM-receptor interaction;ko04510 Focal adhesion;ko04974 Protein digestion and absorption;ko05200 Pathways in cancer;ko05222 Small cell lung cancer;ko04933 AGE-RAGE signaling pathway in diabetic complications;ko05146 Amoebiasis	-
ENSG00000187689	69.6953	1.91774	5.18358	1.99e-05	0.00115496	up	AMTN	amelotin [Source:HGNC Symbol;Acc:HGNC:33188]	GO:0005911;GO:0005605;GO:0005578;GO:0070175;GO:0042475;GO:0005576;GO:0005515;GO:0007155;GO:0031214;GO:0044267;GO:0005788;GO:0043687;GO:0003674;GO:0070169	-	-
ENSG00000218537	94.665	26.7409	1.82378	0.000508702	0.0144586	up	MIF-AS1	MIF antisense RNA 1 [Source:HGNC Symbol;Acc:HGNC:27669]	-	-	-
ENSG00000271601	3.79023	12.218	-1.68865	9.81e-06	0.00067553	down	LIX1L	limb and CNS expressed 1 like [Source:HGNC Symbol;Acc:HGNC:28715]	GO:0005737;GO:0003674;GO:0008150;GO:0005575;GO:0097352	K16673-ko04391 Hippo signaling pathway -fly	-
ENSG00000130589	40.6725	8.58266	2.24456	0.00150969	0.0313533	up	HELZ2	helicase with zinc finger 2 [Source:HGNC Symbol;Acc:HGNC:30021]	GO:0019216;GO:0006355;GO:0006351;GO:0003677;GO:0004386;GO:0016787;GO:0005524;GO:0000166;GO:0046872;GO:0016020;GO:0005634;GO:0003723;GO:0003676;GO:0030374;GO:0005515;GO:0045944;GO:0005654	-	KOG1804-RNA helicase[A]
ENSG00000154640	73.9211	17.7021	2.06206	0.000742928	0.018632	up	BTG3	BTG anti-proliferation factor 3 [Source:HGNC Symbol;Acc:HGNC:1132]	GO:0005515;GO:0005737;GO:0008285;GO:0045930	K14443-ko03018 RNA degradation	-
ENSG00000105519	6.13124	17.558	-1.51788	0.00150337	0.0312836	down	CAPS	calcyphosine [Source:HGNC Symbol;Acc:HGNC:1487]	GO:0005509	-	KOG0032-Ca2+/calmodulin-dependent protein kinase, EF-Hand protein superfamily[T]
ENSG00000169291	2.19729	6.27766	-1.5145	0.000587307	0.0159234	down	SHE	Src homology 2 domain containing E [Source:HGNC Symbol;Acc:HGNC:27004]	GO:0005515;GO:0009967;GO:0007165;GO:0005070	-	-
ENSG00000163606	1.03678	10.6265	-3.35748	4.04e-08	7.67e-06	down	CD200R1	CD200 receptor 1 [Source:HGNC Symbol;Acc:HGNC:24235]	GO:0005576;GO:0005515;GO:0005886;GO:0016021;GO:0016020;GO:0050776;GO:0009897;GO:0016032;GO:0004872;GO:0043235	-	-
ENSG00000114166	4.86771	23.5586	-2.27494	5.76e-05	0.00270054	down	KAT2B	lysine acetyltransferase 2B [Source:HGNC Symbol;Acc:HGNC:8638]	GO:0042641;GO:0031674;GO:0031672;GO:0005671;GO:0005634;GO:0000776;GO:0000123;GO:0045944;GO:0045893;GO:0045736;GO:0043970;GO:0035948;GO:0018393;GO:0016573;GO:0019901;GO:0004861;GO:0004468;GO:0004402;GO:0003713;GO:0003682;GO:0000977;GO:0048511;GO:0005515;GO:0016746;GO:0006355;GO:0006351;GO:0016740;GO:0007049;GO:0008080;GO:0016579;GO:0005654;GO:0008285;GO:0016032;GO:0045815;GO:0008134;GO:0006338;GO:…	K06062-ko04330 Notch signaling pathway;ko04919 Thyroid hormone signaling pathway;ko05203 Viral carcinogenesis;ko05166 HTLV-I infection	KOG1472-Histone acetyltransferase SAGA/ADA, catalytic subunit PCAF/GCN5 and related proteins[BK]
ENSG00000257588	0.412764	7.13526	-4.11158	0.00096786	0.0228677	down	AC025154.2	-	-	-	-
ENSG00000154330	1.17954	6.86506	-2.54104	3.91e-05	0.00197577	down	PGM5	phosphoglucomutase 5 [Source:HGNC Symbol;Acc:HGNC:8908]	GO:0005975;GO:0007155;GO:0000287;GO:0046872;GO:0005737;GO:0030054;GO:0005856;GO:0016868;GO:0005925;GO:0071704;GO:0042383;GO:0030018;GO:0005912;GO:0009898;GO:0043034;GO:0005198;GO:0016010;GO:0001725;GO:0014704;GO:0005913;GO:0005914;GO:0030055	-	KOG0625-Phosphoglucomutase[G]
ENSG00000215182	0.0221533	25.1498	-10.1488	9.05e-08	1.52e-05	down	MUC5AC	mucin 5AC, oligomeric mucus/gel-forming [Source:HGNC Symbol;Acc:HGNC:7515]	GO:0005576;GO:0005737;GO:0005615;GO:0048015;GO:0005886;GO:0070701;GO:0070062;GO:0002223;GO:0005796;GO:0016266;GO:0005201	-	-
ENSG00000137628	47.1745	4.13418	3.51234	1.2e-05	0.000776657	up	DDX60	DExD/H-box helicase 60 [Source:HGNC Symbol;Acc:HGNC:25942]	GO:0005737;GO:0051607;GO:0003723;GO:0045111;GO:0004386;GO:0016787;GO:0005829;GO:0005524;GO:0000166;GO:0003676;GO:0002376;GO:0045087;GO:0005515;GO:0009615;GO:0003690;GO:0003725;GO:1900245;GO:1900246;GO:0003727	-	KOG0949-Predicted helicase, DEAD-box superfamily[R]
ENSG00000198848	3.05383	56.1947	-4.20174	1.62e-09	5.07e-07	down	CES1	carboxylesterase 1 [Source:HGNC Symbol;Acc:HGNC:1863]	GO:0016787;GO:0005783;GO:0005829;GO:0005788;GO:0052689;GO:0006805;GO:0030855;GO:0047374;GO:0008152;GO:0051791;GO:0006695;GO:0009636;GO:0004771;GO:0090122	K01044-ko00983 Drug metabolism - other enzymes	KOG1516-Carboxylesterase and related proteins[R]
ENSG00000171421	112.292	35.4126	1.66493	0.0014263	0.0300171	up	MRPL36	mitochondrial ribosomal protein L36 [Source:HGNC Symbol;Acc:HGNC:14490]	GO:0016604;GO:0005739;GO:0005840;GO:0006412;GO:0003735;GO:0005622;GO:0030529;GO:0005743;GO:0070125;GO:0070126;GO:0005762	K02919-ko03010 Ribosome	KOG4122-Mitochondrial/chloroplast ribosomal protein L36[J]
ENSG00000111331	120.915	16.9297	2.83637	5.73e-06	0.000455366	up	OAS3	2'-5'-oligoadenylate synthetase 3 [Source:HGNC Symbol;Acc:HGNC:8088]	GO:0003725;GO:0001730;GO:0006955;GO:0005515;GO:0005886;GO:0016740;GO:0005654;GO:0005829;GO:0005524;GO:0000166;GO:0046872;GO:0005737;GO:0005634;GO:0003723;GO:0016779;GO:0005615;GO:0051607;GO:0002376;GO:0045087;GO:0009615;GO:0045071;GO:0006139;GO:0060333;GO:0060337;GO:0043231;GO:0060700	K14216-ko05162 Measles;ko05164 Influenza A;ko05160 Hepatitis C;ko05168 Herpes simplex infection	KOG0001-Ubiquitin and ubiquitin-like proteins[OR]
ENSG00000111335	138.861	19.6428	2.82157	3.03e-05	0.001606	up	OAS2	2'-5'-oligoadenylate synthetase 2 [Source:HGNC Symbol;Acc:HGNC:8087]	GO:0006955;GO:0005524;GO:0003723;GO:0016740;GO:0051607;GO:0003725;GO:0006401;GO:0001730;GO:0005515;GO:0005739;GO:0043231;GO:0005783;GO:0005654;GO:0005829;GO:0000166;GO:0046872;GO:0016020;GO:0005737;GO:0005634;GO:0016779;GO:0048471;GO:0002376;GO:0045087;GO:0006486;GO:0009615;GO:0006139;GO:0060333;GO:0060337;GO:0018377	K14216-ko05162 Measles;ko05164 Influenza A;ko05160 Hepatitis C;ko05168 Herpes simplex infection	KOG0001-Ubiquitin and ubiquitin-like proteins[OR]
ENSG00000142875	5.5208	16.5796	-1.58646	0.000722839	0.0182998	down	PRKACB	protein kinase cAMP-activated catalytic subunit beta [Source:HGNC Symbol;Acc:HGNC:9381]	GO:0034380;GO:0005515;GO:0005886;GO:0045171;GO:0016310;GO:0016301;GO:0016740;GO:0005829;GO:0006468;GO:0005524;GO:0004674;GO:0000166;GO:0004672;GO:0016020;GO:0005737;GO:0005634;GO:0000287;GO:0005813;GO:0070062;GO:0002223;GO:0005654;GO:0031625;GO:0007165;GO:0007596;GO:0003091;GO:0034199;GO:0071377;GO:0097546;GO:0004691;GO:0005952;GO:0007188;GO:0048471;GO:1901621;GO:0097338;GO:0070613;GO:0051447;GO:…	K04345-ko04014 Ras signaling pathway;ko04010 MAPK signaling pathway;ko04310 Wnt signaling pathway;ko04340 Hedgehog signaling pathway;ko04341 Hedgehog signaling pathway - Fly;ko04020 Calcium signaling pathway;ko04024 cAMP signaling pathway;ko04113 Meiosis - yeast;ko04114 Oocyte meiosis;ko04540 Gap junction;ko04611 Platelet activation;ko04062 Chemokine signaling pathway;ko04911 Insulin secretion;ko…	KOG0616-cAMP-dependent protein kinase catalytic subunit (PKA)[T]
ENSG00000148468	3.46026	12.7535	-1.88194	0.000300804	0.00975626	down	FAM171A1	family with sequence similarity 171 member A1 [Source:HGNC Symbol;Acc:HGNC:23522]	GO:0016021;GO:0016020;GO:0070062	-	-
ENSG00000138180	39.4422	9.96478	1.98483	0.000914297	0.0219249	up	CEP55	centrosomal protein 55 [Source:HGNC Symbol;Acc:HGNC:1161]	GO:0045171;GO:0030496;GO:0005515;GO:0005886;GO:0051301;GO:0016020;GO:0005737;GO:0007049;GO:0005815;GO:0005856;GO:0005813;GO:0005814;GO:0032154;GO:0000920;GO:0045184;GO:0090543;GO:0000281	-	-
ENSG00000104889	92.6242	20.4145	2.18179	0.00102833	0.0238936	up	RNASEH2A	ribonuclease H2 subunit A [Source:HGNC Symbol;Acc:HGNC:18518]	GO:0032299;GO:0006298;GO:0016070;GO:0090305;GO:0016787;GO:0005654;GO:0005829;GO:0046872;GO:0005634;GO:0003723;GO:0003676;GO:0004519;GO:0090501;GO:0090502;GO:0004518;GO:0006260;GO:0004523;GO:0004540;GO:0006401	K10743-ko03030 DNA replication	KOG2299-Ribonuclease HI[L]
ENSG00000085552	55.6776	11.6582	2.25575	0.000315235	0.010106	up	IGSF9	immunoglobulin superfamily member 9 [Source:HGNC Symbol;Acc:HGNC:18132]	GO:0005886;GO:0016021;GO:0016020;GO:0007275;GO:0030054;GO:0045202;GO:0007399;GO:0030154;GO:0060077;GO:0030425;GO:0030424;GO:0050807;GO:0016358;GO:0007156;GO:0098632	-	-
ENSG00000184719	2.13307	6.15036	-1.52774	0.000581177	0.0158106	down	RNLS	renalase, FAD dependent amine oxidase [Source:HGNC Symbol;Acc:HGNC:25641]	GO:0005576;GO:0055114;GO:0016491;GO:0034356;GO:0016651;GO:0005615;GO:1902074;GO:0071871;GO:0071869;GO:0002931	-	-
ENSG00000107281	17.723	70.5503	-1.99303	0.000658983	0.0173206	down	NPDC1	neural proliferation, differentiation and control 1 [Source:HGNC Symbol;Acc:HGNC:7899]	GO:0016021;GO:0016020;GO:0005515;GO:0050776;GO:0005886	-	KOG3884-Neural proliferation, differentiation and control protein[T]
ENSG00000244734	7.11401	57.8498	-3.02358	0.0011903	0.0266583	down	HBB	hemoglobin subunit beta [Source:HGNC Symbol;Acc:HGNC:4827]	GO:0005515;GO:0005506;GO:0046872;GO:0006810;GO:0020037;GO:0098869;GO:0006898;GO:0005576;GO:0050880;GO:0030492;GO:0019825;GO:0005829;GO:0005344;GO:0015671;GO:0005833;GO:0070062;GO:0072562;GO:0043312;GO:0008217;GO:0070527;GO:1904813;GO:1904724;GO:0070293;GO:0007596;GO:0015701;GO:0045429;GO:0010942;GO:0042542;GO:0031838;GO:0071682;GO:0004601;GO:0042744;GO:0030185;GO:0031720;GO:0051291	K13823-ko05144 Malaria;ko05143 African trypanosomiasis	KOG3378-Globins and related hemoproteins[C]
ENSG00000160349	0.0001	8.77483	-16.4211	0.00116533	0.0262702	down	LCN1	lipocalin 1 [Source:HGNC Symbol;Acc:HGNC:6525]	GO:0031404;GO:0005615;GO:0008270;GO:0005576;GO:0010951;GO:0006810;GO:0050896;GO:0050909;GO:0070062;GO:0001895;GO:0004869;GO:0006508;GO:0015909	-	-
ENSG00000167695	25.5341	5.78777	2.14134	0.000673899	0.0175511	up	FAM57A	family with sequence similarity 57 member A [Source:HGNC Symbol;Acc:HGNC:29646]	GO:0005886;GO:0016021;GO:0016020	-	KOG4561-Uncharacterized conserved protein, contains TBC domain[TR]
ENSG00000255248	2.54257	15.6095	-2.61807	4.15e-07	5.58e-05	down	MIR100HG	mir-100-let-7a-2 cluster host gene [Source:HGNC Symbol;Acc:HGNC:39522]	-	-	-
ENSG00000129514	13.151	42.9423	-1.70723	0.00232638	0.0431842	down	FOXA1	forkhead box A1 [Source:HGNC Symbol;Acc:HGNC:5021]	GO:0005902;GO:0005634;GO:1902691;GO:0061448;GO:0061144;GO:0060743;GO:0060741;GO:0060740;GO:0060738;GO:0060528;GO:0060487;GO:0060441;GO:0060425;GO:0051726;GO:0048665;GO:0048646;GO:0045944;GO:0045880;GO:0045666;GO:0042593;GO:0042445;GO:0035239;GO:0030324;GO:0021904;GO:0010468;GO:0007219;GO:0006357;GO:0006338;GO:0000122;GO:0043565;GO:0003700;GO:0003677;GO:0001228;GO:0019904;GO:0008134;GO:0016569;GO:…	-	KOG3563-Forkhead/HNF-3-related transcription factor[K]
ENSG00000134240	0.0318677	6.89418	-7.75714	3.58e-12	2.15e-09	down	HMGCS2	3-hydroxy-3-methylglutaryl-CoA synthase 2 [Source:HGNC Symbol;Acc:HGNC:5008]	GO:0005739;GO:0005743;GO:0004421;GO:0019216;GO:0008299;GO:0008152;GO:0006629;GO:0003824;GO:0016740;GO:0008202;GO:0008203;GO:0006694;GO:0006695;GO:0016126;GO:0005759;GO:0046951	K01641-ko00650 Butanoate metabolism;ko00072 Synthesis and degradation of ketone bodies;ko00280 Valine, leucine and isoleucine degradation;ko00900 Terpenoid backbone biosynthesis	KOG1393-Hydroxymethylglutaryl-CoA synthase[I]
ENSG00000187608	909.735	33.4949	4.76343	8.36e-13	6.29e-10	up	ISG15	ISG15 ubiquitin-like modifier [Source:HGNC Symbol;Acc:HGNC:4053]	GO:0051607;GO:0045648;GO:0042742;GO:0032020;GO:0030501;GO:0019941;GO:0031386;GO:0005576;GO:0005515;GO:0005737;GO:0002376;GO:0045087;GO:0005829;GO:0005654;GO:0045071;GO:0016032;GO:0060337;GO:0019985;GO:0032480;GO:0031397;GO:0032649;GO:0034340	K12159-ko04622 RIG-I-like receptor signaling pathway	KOG0001-Ubiquitin and ubiquitin-like proteins[OR]
ENSG00000117983	5.10789	539.1	-6.72168	0.0019525	0.0380019	down	MUC5B	mucin 5B, oligomeric mucus/gel-forming [Source:HGNC Symbol;Acc:HGNC:7516]	GO:0005615;GO:0043030;GO:0042742;GO:0005576;GO:0043231;GO:0005886;GO:0070701;GO:0005515;GO:0070062;GO:0002223;GO:0005796;GO:0016266	K13908-ko04970 Salivary secretion	KOG1216-von Willebrand factor and related coagulation proteins[WV]
ENSG00000125319	9.54679	1.53857	2.63342	2.69e-06	0.000258258	up	C17orf53	chromosome 17 open reading frame 53 [Source:HGNC Symbol;Acc:HGNC:28460]	-	-	-
ENSG00000114270	72.0412	19.7489	1.86705	0.000705851	0.0179727	up	COL7A1	collagen type VII alpha 1 chain [Source:HGNC Symbol;Acc:HGNC:2214]	GO:0005604;GO:0042802;GO:0005581;GO:0005576;GO:0005515;GO:0010951;GO:0004867;GO:0007155;GO:0005578;GO:0005615;GO:0030414;GO:0010466;GO:0000139;GO:0030574;GO:0031012;GO:0006888;GO:0030198;GO:0048208;GO:0005788;GO:0033116;GO:0008544;GO:0030134;GO:0035987;GO:0005590	K16628-ko04974 Protein digestion and absorption	KOG3544-Collagens (type IV and type XIII), and related proteins[W]
ENSG00000214021	8.48083	18.5776	-1.13129	0.00110517	0.0251494	down	TTLL3	tubulin tyrosine ligase like 3 [Source:HGNC Symbol;Acc:HGNC:24483]	GO:0006464;GO:0003824;GO:0005524;GO:0070735;GO:0018094;GO:0016874;GO:0000166;GO:0005737;GO:0005856;GO:0005874;GO:0042995;GO:0060271;GO:0005929;GO:0005829;GO:0015630;GO:0005930;GO:0070736;GO:0035082	-	-
ENSG00000180875	0.138643	7.92828	-5.83756	1.64e-22	7.44e-19	down	GREM2	gremlin 2, DAN family BMP antagonist [Source:HGNC Symbol;Acc:HGNC:17655]	GO:0005615;GO:0060300;GO:0048263;GO:0038098;GO:0030514;GO:0019221;GO:0010172;GO:0042803;GO:0036122;GO:0008201;GO:0005576;GO:0007275;GO:0005125;GO:0030509	-	-
ENSG00000169218	0.485627	5.17946	-3.41488	0.000968822	0.022868	down	RSPO1	R-spondin 1 [Source:HGNC Symbol;Acc:HGNC:21679]	GO:0005576;GO:0005515;GO:0005634;GO:0016055;GO:0050896;GO:0008201;GO:0001934;GO:0005102;GO:0090263;GO:0001664;GO:0030177;GO:0002090	-	KOG3525-Subtilisin-like proprotein convertase[O]
ENSG00000143324	36.995	10.2211	1.85579	0.000243878	0.00830423	up	XPR1	xenotropic and polytropic retrovirus receptor 1 [Source:HGNC Symbol;Acc:HGNC:12827]	GO:0009615;GO:0004872;GO:0005886;GO:0016021;GO:0016020;GO:0005737;GO:0046718;GO:0004930;GO:0007186;GO:0031226;GO:0015562;GO:0004888;GO:0001618;GO:0035435;GO:0030643;GO:0000822;GO:0015114	-	KOG1162-Predicted small molecule transporter[U]
ENSG00000171916	13.1762	3.16502	2.05764	0.000912888	0.021913	up	LGALS9C	galectin 9C [Source:HGNC Symbol;Acc:HGNC:33874]	GO:0030246;GO:0005829;GO:0005515	-	KOG3587-Galectin, galactose-binding lectin[W]
ENSG00000184564	0.515893	14.9025	-4.85234	1.57e-15	2.11e-12	down	SLITRK6	SLIT and NTRK like family member 6 [Source:HGNC Symbol;Acc:HGNC:23503]	GO:0071944;GO:0090102;GO:0060384;GO:0060007;GO:0060005;GO:0051965;GO:0048812;GO:0043010;GO:0042472;GO:0035264;GO:0031223;GO:0021562;GO:0008344;GO:0007601;GO:0007416;GO:0007409;GO:0002093;GO:0002088;GO:0001964;GO:0005886;GO:0016021;GO:0016020;GO:0050896;GO:0005887;GO:0007605;GO:0009986	-	-
ENSG00000168079	1.7232	22.4951	-3.70645	5.37e-06	0.000433752	down	SCARA5	scavenger receptor class A member 5 [Source:HGNC Symbol;Acc:HGNC:28701]	GO:0009986;GO:0005887;GO:0070207;GO:0034755;GO:0034605;GO:0006897;GO:0006879;GO:0070287;GO:0005886;GO:0006811;GO:0016020;GO:0016021;GO:0006810;GO:0005044;GO:0006898;GO:0030193;GO:0055072;GO:0010468	-	-
ENSG00000053747	48.468	13.7866	1.81376	0.00148723	0.0310014	up	LAMA3	laminin subunit alpha 3 [Source:HGNC Symbol;Acc:HGNC:6483]	GO:0005610;GO:0005604;GO:0005576;GO:0005102;GO:0007155;GO:0005578;GO:0030334;GO:0030155;GO:0045995;GO:0070062;GO:0030198;GO:0005198;GO:0022617;GO:0008544;GO:0031581;GO:0035987	-	KOG1836-Extracellular matrix glycoprotein Laminin subunits alpha and gamma[W]
ENSG00000179277	1.11305	6.09276	-2.45257	0.000939456	0.0223061	down	MEIS3P1	Meis homeobox 3 pseudogene 1 [Source:HGNC Symbol;Acc:HGNC:7002]	-	-	-
ENSG00000178896	82.5352	26.3484	1.64729	0.000588796	0.0159328	up	EXOSC4	exosome component 4 [Source:HGNC Symbol;Acc:HGNC:18189]	GO:0005515;GO:0045111;GO:0005829;GO:0005737;GO:0005634;GO:0003723;GO:0006364;GO:0005730;GO:0000956;GO:0043488;GO:0090503;GO:0005654;GO:0030307;GO:0043928;GO:0071044;GO:0017091;GO:0051607;GO:0035327;GO:0071028;GO:0000178;GO:0000460;GO:0000175;GO:0034427;GO:0034475;GO:0071051;GO:0000176;GO:0000177;GO:0016075;GO:0031125;GO:0045006	K11600-ko03018 RNA degradation	KOG1068-Exosomal 3'-5' exoribonuclease complex, subunit Rrp41 and related exoribonucleases[J]
ENSG00000205277	5.72932	0.914211	2.64777	0.00230277	0.0429115	up	MUC12	mucin 12, cell surface associated [Source:HGNC Symbol;Acc:HGNC:7510]	GO:0016021;GO:0016020;GO:0005886;GO:0005887;GO:0003674;GO:0002223;GO:0001558;GO:0005796;GO:0016266	-	-
ENSG00000176619	72.633	24.413	1.57298	0.00169616	0.0341767	up	LMNB2	lamin B2 [Source:HGNC Symbol;Acc:HGNC:6638]	GO:0005638;GO:0005635;GO:0005634;GO:0005882;GO:0005198;GO:0016020;GO:0003674;GO:0008150;GO:0005637	K07611-ko04210 Apoptosis;ko04214 Apoptosis - fly	KOG0977-Nuclear envelope protein lamin, intermediate filament superfamily[DY]
ENSG00000243207	25.0487	0.064098	8.61024	2.22e-17	4.86e-14	up	PPAN-P2RY11	PPAN-P2RY11 readthrough [Source:HGNC Symbol;Acc:HGNC:33526]	GO:0007165;GO:0004871;GO:0007186;GO:0004930;GO:0016021;GO:0016020;GO:0019843;GO:0000027;GO:0030687	-	KOG2963-RNA-binding protein required for 60S ribosomal subunit biogenesis[J]
ENSG00000203616	2.2635	73.4334	-5.01981	9.11e-07	0.000108634	down	RHOT1P2	ras homolog family member T1 pseudogene 2 [Source:HGNC Symbol;Acc:HGNC:37838]	-	-	-
ENSG00000068079	81.6717	17.8793	2.19155	0.000165463	0.00624403	up	IFI35	interferon induced protein 35 [Source:HGNC Symbol;Acc:HGNC:5399]	GO:0005515;GO:0005634;GO:0005829;GO:0060337	-	-
ENSG00000182379	15.3188	2.31501	2.72621	0.000132876	0.00521029	up	NXPH4	neurexophilin 4 [Source:HGNC Symbol;Acc:HGNC:8078]	GO:0005576;GO:0007218;GO:0003674;GO:0005575;GO:0005102	-	-
ENSG00000260822	2.16337	6.75032	-1.64167	0.000691677	0.0177992	down	AC004656.1	-	-	-	-
ENSG00000154277	34.6069	8.15784	2.0848	0.00183853	0.0362824	up	UCHL1	ubiquitin C-terminal hydrolase L1 [Source:HGNC Symbol;Acc:HGNC:12513]	GO:0006508;GO:0008234;GO:0008233;GO:0016874;GO:0016787;GO:0005622;GO:0016579;GO:0004843;GO:0006511;GO:0036459;GO:0005515;GO:1904115;GO:0005789;GO:0005783;GO:0005654;GO:0005829;GO:0016020;GO:0005737;GO:0070062;GO:0043130;GO:0005886;GO:0016241;GO:0031625;GO:0043161;GO:0004197;GO:0043407;GO:0031694;GO:0008242;GO:0044306;GO:0043209;GO:0043025;GO:0030424;GO:0050905;GO:0048747;GO:0042755;GO:0019896;GO:…	K05611-ko05012 Parkinson's disease	KOG1415-Ubiquitin C-terminal hydrolase UCHL1[O]
ENSG00000006747	2.33741	13.2729	-2.5055	7.14e-05	0.00316753	down	SCIN	scinderin [Source:HGNC Symbol;Acc:HGNC:21695]	GO:0051693;GO:0003779;GO:0051015;GO:0005509;GO:0046872;GO:0005737;GO:0030054;GO:0005856;GO:0042995;GO:0051014;GO:0070062;GO:0002102;GO:0005938;GO:0008285;GO:0043065;GO:0005546;GO:0001786;GO:0005545;GO:0051047;GO:0042989;GO:0051127;GO:0017156;GO:0045654;GO:0045010;GO:0032330;GO:0043234;GO:0005903	K05768-ko04810 Regulation of actin cytoskeleton;ko04666 Fc gamma R-mediated phagocytosis;ko05203 Viral carcinogenesis	KOG0443-Actin regulatory proteins (gelsolin/villin family)[Z]
ENSG00000238227	20.4142	6.21862	1.71491	0.000902581	0.0217292	up	TMEM250	transmembrane protein 250 [Source:HGNC Symbol;Acc:HGNC:31009]	GO:0005515;GO:0005654;GO:0016021;GO:0016020;GO:0005737;GO:0005634;GO:0007049;GO:0008284;GO:0016032;GO:0048524	-	KOG2655-Septin family protein (P-loop GTPase)[DZU]
ENSG00000277632	13.4707	2.26868	2.5699	0.000547523	0.0152205	up	CCL3	C-C motif chemokine ligand 3 [Source:HGNC Symbol;Acc:HGNC:10627]	GO:0006955;GO:0005576;GO:0005515;GO:0005829;GO:0016301;GO:0005737;GO:0006816;GO:0005125;GO:0005615;GO:0006954;GO:0008009;GO:0006935;GO:0060326;GO:0042802;GO:0050918;GO:0007186;GO:0043547;GO:0070098;GO:0007010;GO:0010628;GO:0005622;GO:0030335;GO:0071346;GO:0071347;GO:0071356;GO:0006887;GO:0008360;GO:0048245;GO:0010629;GO:0050718;GO:0070374;GO:0045671;GO:0000165;GO:0004672;GO:0010818;GO:0030593;GO:…	K05408-ko04060 Cytokine-cytokine receptor interaction;ko04620 Toll-like receptor signaling pathway;ko04062 Chemokine signaling pathway;ko05323 Rheumatoid arthritis;ko05132 Salmonella infection;ko05142 Chagas disease (American trypanosomiasis)	-
ENSG00000128641	51.6692	13.5132	1.93493	0.000666501	0.017461	up	MYO1B	myosin IB [Source:HGNC Symbol;Acc:HGNC:7596]	GO:0005886;GO:0016459;GO:0003774;GO:0005524;GO:0000166;GO:0003779;GO:0005737;GO:0048471;GO:0005516;GO:0045296;GO:0051015;GO:0030175;GO:0070062;GO:0071944;GO:0005769;GO:0010008;GO:0005546;GO:0005547;GO:0005903;GO:0051017;GO:0005884;GO:0007015;GO:0032588;GO:0000146;GO:0006892;GO:0030048;GO:0045177;GO:0030898	-	KOG0164-Myosin class I heavy chain[Z]
ENSG00000176533	1.30278	7.26984	-2.48033	9.88e-08	1.62e-05	down	GNG7	G protein subunit gamma 7 [Source:HGNC Symbol;Acc:HGNC:4410]	GO:0005834;GO:0007165;GO:0004871;GO:0005886;GO:0007186;GO:0016020;GO:0070062;GO:0008277;GO:0071377	K04543-ko04014 Ras signaling pathway;ko04151 PI3K-Akt signaling pathway;ko04062 Chemokine signaling pathway;ko04724 Glutamatergic synapse;ko04727 GABAergic synapse;ko04725 Cholinergic synapse;ko04728 Dopaminergic synapse;ko04726 Serotonergic synapse;ko04723 Retrograde endocannabinoid signaling;ko04740 Olfactory transduction;ko04713 Circadian entrainment;ko05200 Pathways in cancer;ko05032 Morphine…	KOG4119-G protein gamma subunit[T]
ENSG00000101452	11.5428	3.09544	1.89878	0.000890757	0.0215564	up	DHX35	DEAH-box helicase 35 [Source:HGNC Symbol;Acc:HGNC:15861]	GO:0008026;GO:0016787;GO:0005524;GO:0000166;GO:0003676;GO:0004386;GO:0005681;GO:0008380;GO:0006397;GO:0005737;GO:0004004;GO:0000398;GO:0071013;GO:0006396	-	KOG0925-mRNA splicing factor ATP-dependent RNA helicase[A]
ENSG00000107317	14.2392	382.112	-4.74605	1.46e-21	3.95e-18	down	PTGDS	prostaglandin D2 synthase [Source:HGNC Symbol;Acc:HGNC:9592]	GO:0006629;GO:0005215;GO:0006810;GO:0005576;GO:0005515;GO:0006633;GO:0006631;GO:0005794;GO:0005783;GO:0016853;GO:0016020;GO:0005737;GO:0005634;GO:0048471;GO:0005615;GO:0036094;GO:0005789;GO:0070062;GO:0031965;GO:0005504;GO:0001516;GO:0006693;GO:0019371;GO:0005791;GO:0004667;GO:0005501;GO:0045187	K01830-ko00590 Arachidonic acid metabolism	-
ENSG00000165949	742.308	68.5193	3.43743	2.87e-09	8.19e-07	up	IFI27	interferon alpha inducible protein 27 [Source:HGNC Symbol;Acc:HGNC:5397]	GO:0016021;GO:0016020;GO:0060135;GO:0034097;GO:0032355	-	-
ENSG00000163735	10.7052	0.101687	6.71803	2.36e-12	1.46e-09	up	CXCL5	C-X-C motif chemokine ligand 5 [Source:HGNC Symbol;Acc:HGNC:10642]	GO:0006955;GO:0005576;GO:0005515;GO:0006935;GO:0005125;GO:0005615;GO:0008009;GO:0006952;GO:0060326;GO:0007186;GO:0006954;GO:0070098;GO:0007165;GO:0007267;GO:0032496;GO:0008284;GO:0045236;GO:0090023;GO:0002446	K05506-ko04060 Cytokine-cytokine receptor interaction;ko04062 Chemokine signaling pathway;ko05323 Rheumatoid arthritis;ko05133 Pertussis	-
ENSG00000163739	106.73	17.2401	2.63013	0.00107233	0.0246115	up	CXCL1	C-X-C motif chemokine ligand 1 [Source:HGNC Symbol;Acc:HGNC:4602]	GO:0006955;GO:0005576;GO:0043085;GO:0008083;GO:0006935;GO:0005125;GO:0005615;GO:0006954;GO:0008009;GO:0006952;GO:0060326;GO:0070098;GO:0043312;GO:0007399;GO:0007186;GO:0007165;GO:0032496;GO:0005102;GO:0035580;GO:1904724;GO:0008283;GO:0008285;GO:0035556;GO:0030036;GO:0008047;GO:0045236;GO:0090023	K05505-ko04668 TNF signaling pathway;ko04060 Cytokine-cytokine receptor interaction;ko04062 Chemokine signaling pathway;ko05132 Salmonella infection;ko05134 Legionellosis	-
ENSG00000205420	5300.11	621.926	3.09121	3.47e-06	0.000309391	up	KRT6A	keratin 6A [Source:HGNC Symbol;Acc:HGNC:6443]	GO:0005882;GO:0007010;GO:0005515;GO:0005198;GO:0016020;GO:0005634;GO:0030154;GO:0045095;GO:0005829;GO:0070062;GO:0031424;GO:0008284;GO:0005200;GO:0042060;GO:0070268;GO:0002009	-	-
ENSG00000162062	11.5106	2.24459	2.35844	0.000995733	0.0232976	up	C16orf59	chromosome 16 open reading frame 59 [Source:HGNC Symbol;Acc:HGNC:25849]	GO:0005515	-	-
ENSG00000165490	13.1675	2.16213	2.60646	7.5e-07	9.16e-05	up	DDIAS	DNA damage induced apoptosis suppressor [Source:HGNC Symbol;Acc:HGNC:26351]	GO:0005737;GO:0005634;GO:0006915;GO:0007049;GO:0007050	-	-
ENSG00000185479	1122.68	51.9165	4.43461	6.64e-07	8.24e-05	up	KRT6B	keratin 6B [Source:HGNC Symbol;Acc:HGNC:6444]	GO:0005882;GO:0007010;GO:0005515;GO:0005198;GO:0045095;GO:0005829;GO:0070062;GO:0031424;GO:0005200;GO:0007398;GO:0070268	-	-
ENSG00000111206	38.7801	12.0725	1.68359	0.0019057	0.0373934	up	FOXM1	forkhead box M1 [Source:HGNC Symbol;Acc:HGNC:3818]	GO:0005515;GO:0043565;GO:0006355;GO:0006351;GO:0003700;GO:0003677;GO:0005634;GO:0007049;GO:0006281;GO:0006974;GO:0045893;GO:0045944;GO:0005654;GO:0008284;GO:0000981;GO:0000086;GO:0000122;GO:0045892;GO:0019901;GO:0051726;GO:0032873;GO:0006978;GO:0046578;GO:0071156;GO:0090344;GO:2000377;GO:2000781	-	KOG2294-Transcription factor of the Forkhead/HNF3 family[K]
ENSG00000180758	6.1655	14.7268	-1.25615	0.00165379	0.0335439	down	GPR157	G protein-coupled receptor 157 [Source:HGNC Symbol;Acc:HGNC:23687]	GO:0060170;GO:0060019;GO:0051482;GO:0048512;GO:0007186;GO:0004930;GO:0007165;GO:0004871;GO:0005886;GO:0016020;GO:0016021;GO:0004888;GO:0007166;GO:0007275;GO:0030154;GO:0042995	-	-
ENSG00000147027	2.52262	7.36042	-1.54487	0.00246523	0.0450314	down	TMEM47	transmembrane protein 47 [Source:HGNC Symbol;Acc:HGNC:18515]	GO:0005911;GO:0016021;GO:0016020;GO:0030054;GO:0003674;GO:0008150;GO:0005912;GO:0005886	-	KOG4671-Brain cell membrane protein 1 (BCMP1)[R]
ENSG00000080546	6.56442	13.7603	-1.06777	0.000981487	0.0230539	down	SESN1	sestrin 1 [Source:HGNC Symbol;Acc:HGNC:21595]	GO:0001650;GO:0055114;GO:0016491;GO:0005634;GO:0005737;GO:1901031;GO:0005515;GO:1904262;GO:0005829;GO:0061700;GO:0042149;GO:0072593;GO:0034198;GO:0051920;GO:0070728;GO:0098869	K10141-ko04115 p53 signaling pathway;ko04211 Longevity regulating pathway - mammal	KOG3746-Uncharacterized conserved protein[S]
ENSG00000128298	21.0969	4.82228	2.12924	0.000631886	0.0168339	up	BAIAP2L2	BAI1 associated protein 2 like 2 [Source:HGNC Symbol;Acc:HGNC:26203]	GO:0005886;GO:0016020;GO:0030054;GO:0030659;GO:0031410;GO:0007009;GO:0008289;GO:0005829;GO:0015629;GO:0030838;GO:0051017;GO:0008286;GO:0005543;GO:0044291;GO:0051764;GO:0012506;GO:0061024;GO:0071439;GO:2000251	-	-
ENSG00000247844	12.2413	1.29468	3.24109	3.73e-05	0.00191028	up	CCAT1	colon cancer associated transcript 1 (non-protein coding) [Source:HGNC Symbol;Acc:HGNC:45128]	-	-	-
ENSG00000155380	49.2937	6.20887	2.989	9.37e-09	2.13e-06	up	SLC16A1	solute carrier family 16 member 1 [Source:HGNC Symbol;Acc:HGNC:10922]	GO:0015718;GO:0015129;GO:0008028;GO:0030054;GO:0005886;GO:0015293;GO:0005887;GO:0055085;GO:0043231;GO:0016021;GO:0016020;GO:0006810;GO:0005813;GO:0050900;GO:0070062;GO:0006090;GO:0007098;GO:0015130;GO:0015728;GO:0035879;GO:0035873;GO:0005739;GO:0071407;GO:0051780;GO:0042593;GO:0050796;GO:0032094;GO:0006629;GO:0097159;GO:0042803	-	KOG2504-Monocarboxylate transporter[G]
ENSG00000141338	2.53216	18.4289	-2.86353	1.9e-12	1.27e-09	down	ABCA8	ATP binding cassette subfamily A member 8 [Source:HGNC Symbol;Acc:HGNC:38]	GO:0005886;GO:0005524;GO:0000166;GO:0005215;GO:0006810;GO:0016021;GO:0016020;GO:0016887;GO:0055085;GO:0005743;GO:0006855;GO:0008559;GO:0042626;GO:0006869;GO:0042908	K05650-ko02010 ABC transporters	KOG0059-Lipid exporter ABCA1 and related proteins, ABC superfamily[IR]
ENSG00000272666	19.5111	0.811882	4.58688	1.44e-09	4.7e-07	up	U62317.2	-	-	-	-
ENSG00000116489	47.6766	113.775	-1.25483	0.00023274	0.00801638	down	CAPZA1	capping actin protein of muscle Z-line alpha subunit 1 [Source:HGNC Symbol;Acc:HGNC:1488]	GO:0005515;GO:0008290;GO:0051693;GO:0051016;GO:0003779;GO:0005737;GO:0005856;GO:0005576;GO:0005829;GO:0045296;GO:0070062;GO:0071203;GO:0045087;GO:0006461;GO:0006928;GO:0015629;GO:0007596	K10364-ko04144 Endocytosis	KOG0836-F-actin capping protein, alpha subunit[Z]
ENSG00000228314	1.08392	62.7208	-5.85461	1.48e-10	6.49e-08	down	CYP4F29P	cytochrome P450 family 4 subfamily F member 29, pseudogene [Source:HGNC Symbol;Acc:HGNC:2647]	-	-	-
ENSG00000155850	4.10033	20.4849	-2.32075	1.08e-07	1.72e-05	down	SLC26A2	solute carrier family 26 member 2 [Source:HGNC Symbol;Acc:HGNC:10994]	GO:0008272;GO:0001503;GO:0015116;GO:0005886;GO:0006811;GO:0016020;GO:0055085;GO:0016021;GO:0006810;GO:0008271;GO:0005887;GO:0070062;GO:1902358;GO:0050428;GO:0005254;GO:0015106;GO:0015301;GO:0019531;GO:0015701;GO:0019532;GO:0042391;GO:0051453;GO:1902476	-	KOG0236-Sulfate/bicarbonate/oxalate exchanger SAT-1 and related transporters (SLC26 family)[P]
ENSG00000166920	8.8795	58.3104	-2.7152	5.23e-06	0.000425159	down	C15orf48	chromosome 15 open reading frame 48 [Source:HGNC Symbol;Acc:HGNC:29898]	GO:1902600;GO:0016021;GO:0016020;GO:0005634;GO:0005751;GO:0004129;GO:0005739	-	-
ENSG00000137745	87.5141	0.164061	9.05914	7.53e-05	0.00329735	up	MMP13	matrix metallopeptidase 13 [Source:HGNC Symbol;Acc:HGNC:7159]	GO:0051216;GO:0044267;GO:0030574;GO:0030282;GO:0022617;GO:0006508;GO:0003417;GO:0001958;GO:0008233;GO:0004222;GO:0005576;GO:0008270;GO:0005509;GO:0016787;GO:0046872;GO:0005578;GO:0008237;GO:0031012;GO:0004252;GO:0060349;GO:0005615;GO:0005518;GO:0005581	-	KOG1565-Gelatinase A and related matrix metalloproteases[OW]
ENSG00000081277	351.821	48.6998	2.85285	8.82e-05	0.00371956	up	PKP1	plakophilin 1 [Source:HGNC Symbol;Acc:HGNC:9023]	GO:0030057;GO:1990124;GO:1902373;GO:0010628;GO:0005515;GO:0007165;GO:0005886;GO:0007155;GO:0005654;GO:0005634;GO:0043231;GO:0007275;GO:0016337;GO:0030054;GO:0070062;GO:0031424;GO:0043312;GO:0004871;GO:0019215;GO:0101003;GO:0070268;GO:0001533;GO:0030280;GO:0005882;GO:0005521;GO:0045110	-	KOG1048-Neural adherens junction protein Plakophilin and related Armadillo repeat proteins[TW]
ENSG00000159763	0.655972	494.133	-9.55705	1.48e-21	3.95e-18	down	PIP	prolactin induced protein [Source:HGNC Symbol;Acc:HGNC:8993]	GO:0016324;GO:0005576;GO:0002682;GO:0006508;GO:0003779;GO:0005634;GO:0004190;GO:0005615;GO:0005515;GO:0070062;GO:0010628;GO:0001895;GO:0055085;GO:0046983;GO:0019864;GO:0001948;GO:0001580;GO:0070233	-	-
ENSG00000136828	2.60966	8.64066	-1.72728	0.00280067	0.0496689	down	RALGPS1	Ral GEF with PH domain and SH3 binding motif 1 [Source:HGNC Symbol;Acc:HGNC:16851]	GO:0043547;GO:0005886;GO:0007264;GO:0016020;GO:0005737;GO:0005085;GO:0005575;GO:0035556;GO:0008321;GO:0032485;GO:0005622	-	-
ENSG00000175592	70.7519	11.6731	2.59958	0.000692823	0.0177992	up	FOSL1	FOS like 1, AP-1 transcription factor subunit [Source:HGNC Symbol;Acc:HGNC:13718]	GO:0005515;GO:0043565;GO:0003700;GO:0003677;GO:0006357;GO:0006355;GO:0005654;GO:0005634;GO:0006935;GO:0006366;GO:0009615;GO:0000978;GO:0006968;GO:0008284;GO:2000144;GO:0061614;GO:0043231;GO:0043005;GO:0042734;GO:0005829;GO:0051591;GO:0060674;GO:0051412;GO:0051091;GO:0045944;GO:0045787;GO:0043065;GO:0042493;GO:0042542;GO:0034097;GO:0032570;GO:0031668;GO:0014070;GO:0009629;GO:0009612;GO:0008285;GO:…	K04502-ko04310 Wnt signaling pathway;ko04380 Osteoclast differentiation;ko05166 HTLV-I infection	KOG1414-Transcriptional activator FOSB/c-Fos and related bZIP transcription factors[K]
ENSG00000003147	3.71522	16.0068	-2.10717	0.000478944	0.0138428	down	ICA1	islet cell autoantigen 1 [Source:HGNC Symbol;Acc:HGNC:5343]	GO:0030672;GO:0005829;GO:0005515;GO:0019904;GO:0005794;GO:0043231;GO:0016020;GO:0005737;GO:0006810;GO:0000139;GO:0030054;GO:0045202;GO:0031410;GO:0050796;GO:0030667;GO:0003674;GO:0006836;GO:0030658;GO:0016021	K19863-ko04940 Type I diabetes mellitus	KOG3891-Secretory vesicle-associated protein ICA69, contains Arfaptin domain[TU]
ENSG00000177666	31.6316	66.8671	-1.07993	0.00128477	0.0281201	down	PNPLA2	patatin like phospholipase domain containing 2 [Source:HGNC Symbol;Acc:HGNC:30802]	GO:0005829;GO:0005811;GO:0034389;GO:0019915;GO:0019433;GO:0010898;GO:0010891;GO:0004806;GO:0016787;GO:0005886;GO:0006629;GO:0016042;GO:0008152;GO:0005654;GO:0016021;GO:0016020;GO:0005737;GO:0005789;GO:0044267;GO:0005788;GO:0043687;GO:0036155;GO:0055088;GO:0004465;GO:0016411	K16816-ko00561 Glycerolipid metabolism;ko04923 Regulation of lipolysis in adipocyte	KOG3773-Adiponutrin and related vesicular transport proteins; predicted alpha/beta hydrolase[U]
ENSG00000224818	21.741	0.827521	4.71548	0.000302651	0.00979384	up	AC096677.3	-	-	-	-
ENSG00000139044	51.5844	7.44923	2.79177	2.37e-05	0.00133286	up	B4GALNT3	beta-1,4-N-acetyl-galactosaminyltransferase 3 [Source:HGNC Symbol;Acc:HGNC:24137]	GO:0005794;GO:0016740;GO:0043231;GO:0016021;GO:0016020;GO:0008376;GO:0032580;GO:0033842	K09656-ko00513 Various types of N-glycan biosynthesis	KOG3588-Chondroitin synthase 1[G]
ENSG00000153446	0.429477	12.3178	-4.84202	4.1e-15	4.93e-12	down	C16orf89	chromosome 16 open reading frame 89 [Source:HGNC Symbol;Acc:HGNC:28687]	GO:0005576;GO:0042803;GO:0005829;GO:0016020;GO:0070062	-	-
ENSG00000107937	27.0364	9.42453	1.52041	0.000567211	0.0155184	up	GTPBP4	GTP binding protein 4 [Source:HGNC Symbol;Acc:HGNC:21535]	GO:0005515;GO:0005525;GO:0031965;GO:0005829;GO:0005730;GO:0005634;GO:0000166;GO:0005794;GO:0016020;GO:0003723;GO:0042254;GO:0005737;GO:0048471;GO:0001649;GO:0031397;GO:0008156;GO:0008285;GO:0022408;GO:0030336;GO:0003924;GO:0050821;GO:0000079;GO:0033342	K06943-ko03008 Ribosome biogenesis in eukaryotes	KOG1490-GTP-binding protein CRFG/NOG1 (ODN superfamily)[R]
ENSG00000092978	16.7837	5.54664	1.59737	0.001472	0.0307105	up	GPATCH2	G-patch domain containing 2 [Source:HGNC Symbol;Acc:HGNC:25499]	GO:0016607;GO:0005634;GO:0003676;GO:0005730;GO:0010923	-	-
ENSG00000257764	0.667922	104.623	-7.2913	8.4e-10	2.85e-07	down	AC020656.1	-	-	-	-
ENSG00000164109	11.3809	4.65114	1.29096	0.00227411	0.0425078	up	MAD2L1	mitotic arrest deficient 2 like 1 [Source:HGNC Symbol;Acc:HGNC:6763]	GO:0005737;GO:0005694;GO:0000922;GO:0000776;GO:0000775;GO:0090267;GO:0043066;GO:0007094;GO:0000070;GO:0005515;GO:0042803;GO:0005829;GO:0051301;GO:0005654;GO:0005634;GO:0007049;GO:0048471;GO:0005856;GO:0005643;GO:0042802;GO:0000777;GO:0031145;GO:0043161;GO:0051437;GO:0007062;GO:0051436;GO:0042787;GO:0042177;GO:0007093;GO:0072686;GO:0045930;GO:1904667	K02537-ko04110 Cell cycle;ko04111 Cell cycle - yeast;ko04113 Meiosis - yeast;ko04114 Oocyte meiosis;ko04914 Progesterone-mediated oocyte maturation;ko05166 HTLV-I infection	KOG3285-Spindle assembly checkpoint protein[DZ]
ENSG00000160688	66.8683	21.2628	1.65299	0.00264131	0.0473862	up	FLAD1	flavin adenine dinucleotide synthetase 1 [Source:HGNC Symbol;Acc:HGNC:24671]	GO:0005886;GO:0005829;GO:0005515;GO:0005739;GO:0008152;GO:0003824;GO:0016740;GO:0005524;GO:0000166;GO:0005737;GO:0005759;GO:0016779;GO:0055114;GO:0006771;GO:0003919;GO:0006747	K00953-ko00740 Riboflavin metabolism	KOG2644-3'-phosphoadenosine 5'-phosphosulfate sulfotransferase (PAPS reductase)/FAD synthetase and related enzymes[EH]
ENSG00000161888	24.4773	4.34182	2.49507	0.000134851	0.00527913	up	SPC24	SPC24, NDC80 kinetochore complex component [Source:HGNC Symbol;Acc:HGNC:26913]	GO:0005515;GO:0005694;GO:0051301;GO:0005730;GO:0005634;GO:0007049;GO:0000775;GO:0000776;GO:0000777;GO:0005829;GO:0007062;GO:0031262	-	-
ENSG00000174348	5.39065	26.272	-2.28499	0.000471867	0.0136547	down	PODN	podocan [Source:HGNC Symbol;Acc:HGNC:23174]	GO:0005576;GO:0005737;GO:0005578;GO:0005615;GO:0008285;GO:0004860;GO:0006469;GO:0019221;GO:0046426;GO:0030336;GO:0005518	-	-
ENSG00000269741	19.6785	1.09198	4.17159	6.75e-10	2.38e-07	up	AC011473.4	-	GO:0004252;GO:0006508;GO:0008233;GO:0016787;GO:0008236	-	KOG3627-Trypsin[E]
ENSG00000157168	21.2987	1.74428	3.61006	1.55e-05	0.000959061	up	NRG1	neuregulin 1 [Source:HGNC Symbol;Acc:HGNC:7997]	GO:0005102;GO:0016021;GO:0016020;GO:0009790;GO:0038129;GO:0005576;GO:0043547;GO:0005886;GO:0008083;GO:0018108;GO:0005654;GO:0005634;GO:0046854;GO:0000165;GO:0007171;GO:0008284;GO:0046934;GO:0014066;GO:0048015;GO:0005088;GO:0030971;GO:0005125;GO:0004713;GO:0038128;GO:1901185;GO:2000145;GO:0005178;GO:0032148;GO:1903955;GO:0055007;GO:0000187;GO:0014032;GO:0045892;GO:0007399;GO:0030297;GO:0051048;GO:…	K05455-ko04012 ErbB signaling pathway;ko01521 EGFR tyrosine kinase inhibitor resistance	-
ENSG00000071539	24.1919	5.39897	2.16377	9.49e-05	0.0039513	up	TRIP13	thyroid hormone receptor interactor 13 [Source:HGNC Symbol;Acc:HGNC:12307]	GO:0001673;GO:0048477;GO:0007286;GO:0007283;GO:0007144;GO:0007141;GO:0007131;GO:0007130;GO:0006302;GO:0001556;GO:0042802;GO:0005515;GO:0005524;GO:0000166;GO:1903506;GO:0051321;GO:0030154;GO:0005634;GO:0006366;GO:0003712	-	KOG0744-AAA+-type ATPase[O]
ENSG00000008300	5.53879	0.852081	2.70051	0.00258378	0.0464687	up	CELSR3	cadherin EGF LAG seven-pass G-type receptor 3 [Source:HGNC Symbol;Acc:HGNC:3230]	GO:1904938;GO:0060271;GO:0036515;GO:0036514;GO:0032880;GO:0007413;GO:0001932;GO:0001764;GO:0007165;GO:0004871;GO:0005515;GO:0005886;GO:0007156;GO:0007155;GO:0005509;GO:0007186;GO:0004930;GO:0016020;GO:0016021;GO:0004888;GO:0007166;GO:0007275;GO:0060071	-	KOG4289-Cadherin EGF LAG seven-pass G-type receptor[T]
ENSG00000166405	0.434637	11.0212	-4.66433	2.17e-14	2.27e-11	down	RIC3	RIC3 acetylcholine receptor chaperone [Source:HGNC Symbol;Acc:HGNC:30338]	GO:0005794;GO:0005789;GO:0005783;GO:0016021;GO:0016020;GO:0000139;GO:0043005;GO:0043025;GO:0043231;GO:0007271;GO:0033130;GO:0006457;GO:0034394;GO:0043623;GO:0007204;GO:0044183	-	-
ENSG00000184661	9.21479	3.01759	1.61056	0.000688274	0.0177609	up	CDCA2	cell division cycle associated 2 [Source:HGNC Symbol;Acc:HGNC:14623]	GO:0007059;GO:0051301;GO:0005654;GO:0005829;GO:0005634;GO:0007049;GO:0035307;GO:0005694	-	-
ENSG00000126262	12.5735	0.367425	5.09679	1.24e-06	0.000138312	up	FFAR2	free fatty acid receptor 2 [Source:HGNC Symbol;Acc:HGNC:4501]	GO:0042995;GO:0090276;GO:0071398;GO:0045444;GO:0042593;GO:0032722;GO:0019915;GO:0007186;GO:0002879;GO:0002720;GO:0002673;GO:0002385;GO:0002232;GO:0004930;GO:0007165;GO:0004871;GO:0005886;GO:0016021;GO:0016020;GO:0002376;GO:0006954;GO:0008289;GO:0005515;GO:0005887;GO:2000484;GO:0002752	K04328-ko04024 cAMP signaling pathway	-
ENSG00000175538	2.6315	15.823	-2.58807	4.14e-06	0.000357433	down	KCNE3	potassium voltage-gated channel subfamily E regulatory subunit 3 [Source:HGNC Symbol;Acc:HGNC:6243]	GO:0008076;GO:0005886;GO:1903817;GO:1902260;GO:1901387;GO:0043266;GO:0044325;GO:0015459;GO:0071805;GO:0034765;GO:0006813;GO:0006811;GO:0005267;GO:0005249;GO:0005244;GO:0016020;GO:0016021;GO:0005737;GO:0006810;GO:0045121;GO:0030425;GO:0042995;GO:0005515;GO:0043204;GO:0031982;GO:0086091;GO:0032809;GO:1903765;GO:1905025	K04897-ko04974 Protein digestion and absorption	-
ENSG00000158887	0.366436	7.15319	-4.28696	2.89e-09	8.19e-07	down	MPZ	myelin protein zero [Source:HGNC Symbol;Acc:HGNC:7225]	GO:0098743;GO:0005886;GO:0005887;GO:0016020;GO:0016021;GO:0043209;GO:0007268;GO:0005198;GO:0042552;GO:0098742;GO:0016323;GO:0005791;GO:0005764;GO:0043066	K06770-ko04514 Cell adhesion molecules (CAMs)	-
ENSG00000253729	44.1906	17.4488	1.34061	0.00151266	0.0313684	up	PRKDC	protein kinase, DNA-activated, catalytic polypeptide [Source:HGNC Symbol;Acc:HGNC:9413]	GO:0005634;GO:2001229;GO:2000773;GO:0048639;GO:0048538;GO:0048536;GO:0048146;GO:0043065;GO:0042752;GO:0035234;GO:0033153;GO:0033152;GO:0033151;GO:0033077;GO:0031648;GO:0030098;GO:0014823;GO:0010332;GO:0010212;GO:0008630;GO:0007507;GO:0007420;GO:0006303;GO:0006302;GO:0002684;GO:0002638;GO:0002377;GO:0002360;GO:0002328;GO:0002326;GO:0001933;GO:0001756;GO:0000723;GO:0019899;GO:0004677;GO:0003690;GO:…	K06642-ko03450 Non-homologous end-joining;ko04110 Cell cycle	KOG0891-DNA-dependent protein kinase[L]
ENSG00000167723	5.39984	0.555244	3.28172	6.76e-05	0.00304854	up	TRPV3	transient receptor potential cation channel subfamily V member 3 [Source:HGNC Symbol;Acc:HGNC:18084]	GO:0034220;GO:0006811;GO:0005216;GO:0016021;GO:0016020;GO:0009266;GO:0090280;GO:0009408;GO:0005261;GO:0055085;GO:0006810;GO:0006816;GO:0005262;GO:0070588;GO:0005886;GO:0005887;GO:0043235;GO:0042636	K04972-ko04750 Inflammatory mediator regulation of TRP channels	KOG3676-Ca2+-permeable cation channel OSM-9 and related channels (OTRPC family)[PT]
ENSG00000165810	0.840499	6.85548	-3.02794	7.9e-06	0.000576641	down	BTNL9	butyrophilin like 9 [Source:HGNC Symbol;Acc:HGNC:24176]	GO:0016021;GO:0016020;GO:0005886	-	-
ENSG00000085662	77.9753	15.1088	2.36763	0.000360675	0.0111044	up	AKR1B1	aldo-keto reductase family 1 member B [Source:HGNC Symbol;Acc:HGNC:381]	GO:0097454;GO:0048471;GO:0043220;GO:0042629;GO:0033010;GO:0032838;GO:0005829;GO:0005615;GO:1901653;GO:0097238;GO:0097066;GO:0072061;GO:0072001;GO:0070301;GO:0060135;GO:0048661;GO:0046427;GO:0043066;GO:0042415;GO:0035809;GO:0031098;GO:0018931;GO:0010033;GO:0009414;GO:0005996;GO:0006061;GO:0003091;GO:0001894;GO:0004032;GO:0055114;GO:0016491;GO:0005654;GO:0005737;GO:0070062;GO:0005975;GO:0009055;GO:…	K00011-ko00040 Pentose and glucuronate interconversions;ko00051 Fructose and mannose metabolism;ko00052 Galactose metabolism;ko00561 Glycerolipid metabolism	KOG1577-Aldo/keto reductase family proteins[R]
ENSG00000108813	7.20227	1.29977	2.4702	0.000548957	0.0152205	up	DLX4	distal-less homeobox 4 [Source:HGNC Symbol;Acc:HGNC:2917]	GO:0005515;GO:0043565;GO:0003700;GO:0006355;GO:0003677;GO:0005634;GO:0007275;GO:0000978;GO:0001078;GO:0000122	-	KOG0850-Transcription factor DLX and related proteins with LIM Zn-binding and HOX domains[K]
ENSG00000015475	76.9544	18.114	2.0869	0.000123978	0.0049337	up	BID	BH3 interacting domain death agonist [Source:HGNC Symbol;Acc:HGNC:1050]	GO:0032592;GO:0016020;GO:0005829;GO:0005739;GO:0005737;GO:2001235;GO:2000271;GO:2000045;GO:1902230;GO:1902108;GO:0097345;GO:0097284;GO:0097191;GO:0090200;GO:0051260;GO:0043065;GO:0042981;GO:0042775;GO:0042127;GO:0034349;GO:0032464;GO:0032459;GO:0032355;GO:0010918;GO:0008637;GO:0007420;GO:0006919;GO:0006626;GO:0001836;GO:0046982;GO:0031625;GO:0005515;GO:0006915;GO:0031966;GO:0070062;GO:0008625;GO:…	K04726-ko04071 Sphingolipid signaling pathway;ko04210 Apoptosis;ko04215 Apoptosis - multiple species;ko04115 p53 signaling pathway;ko04650 Natural killer cell mediated cytotoxicity;ko05200 Pathways in cancer;ko05010 Alzheimer's disease;ko05014 Amyotrophic lateral sclerosis (ALS);ko05416 Viral myocarditis;ko04932 Non-alcoholic fatty liver disease (NAFLD);ko05152 Tuberculosis;ko01524 Platinum drug …	-
ENSG00000183323	2.7018	6.57845	-1.28383	0.000619106	0.0165987	down	CCDC125	coiled-coil domain containing 125 [Source:HGNC Symbol;Acc:HGNC:28924]	GO:2000145;GO:0005737	-	-
ENSG00000179950	155.431	57.3705	1.43789	0.00224861	0.0421281	up	PUF60	poly(U) binding splicing factor 60 [Source:HGNC Symbol;Acc:HGNC:17042]	GO:0005515;GO:0030054;GO:0030529;GO:0006355;GO:0006351;GO:0003677;GO:0005654;GO:0005634;GO:0008380;GO:0006397;GO:0003723;GO:0003676;GO:0006915;GO:0042802;GO:0045296;GO:0000398;GO:0019907	K12838-ko03040 Spliceosome	KOG0124-Polypyrimidine tract-binding protein PUF60 (RRM superfamily)[A]
ENSG00000125835	509.058	140.163	1.86072	0.000208068	0.00733448	up	SNRPB	small nuclear ribonucleoprotein polypeptides B and B1 [Source:HGNC Symbol;Acc:HGNC:11153]	GO:0005681;GO:0005515;GO:0005829;GO:0030529;GO:0019013;GO:0005654;GO:0005737;GO:0005634;GO:0008380;GO:0006397;GO:0003723;GO:0000387;GO:0005685;GO:0070062;GO:0005682;GO:0046540;GO:0000398;GO:0006369;GO:0034709;GO:0070034;GO:0005697;GO:0051170;GO:0034719;GO:0071013;GO:0005686;GO:0071004;GO:0005689;GO:0030532;GO:0030620;GO:0006479;GO:0008334;GO:0005683;GO:0005687;GO:0071204;GO:0071208	K11086-ko03040 Spliceosome;ko05322 Systemic lupus erythematosus	KOG3168-U1 snRNP component[K]
ENSG00000152583	31.4046	100.457	-1.67754	8.57e-06	0.000614149	down	SPARCL1	SPARC like 1 [Source:HGNC Symbol;Acc:HGNC:11220]	GO:0005576;GO:0007165;GO:0005509;GO:0046872;GO:0005615;GO:0005578;GO:0070062;GO:0044267;GO:0005788;GO:0043687;GO:0050840;GO:0005518;GO:0048856	-	KOG4004-Matricellular protein Osteonectin/SPARC/BM-40[W]
ENSG00000189366	23.5132	4.3314	2.44056	0.00256057	0.0461785	up	ALG1L	ALG1, chitobiosyldiphosphodolichol beta-mannosyltransferase like [Source:HGNC Symbol;Acc:HGNC:33721]	GO:0016757;GO:0016740;GO:0000030;GO:0097502;GO:0005783;GO:0006486	-	KOG2941-Beta-1,4-mannosyltransferase[O]
ENSG00000105810	20.2581	6.47562	1.64541	0.000960566	0.02274	up	CDK6	cyclin dependent kinase 6 [Source:HGNC Symbol;Acc:HGNC:1777]	GO:0097132;GO:1902036;GO:0060218;GO:0033077;GO:0030097;GO:0010628;GO:0007219;GO:0002244;GO:0000122;GO:0030332;GO:0016301;GO:0005515;GO:0051301;GO:0016310;GO:0016740;GO:0005654;GO:0005829;GO:0006468;GO:0005524;GO:0004674;GO:0000166;GO:0004672;GO:0005737;GO:0005634;GO:0007049;GO:0030154;GO:0005856;GO:0042995;GO:0005813;GO:0005815;GO:0042127;GO:0007165;GO:0001726;GO:0009615;GO:0007050;GO:0008285;GO:…	K02091-ko04151 PI3K-Akt signaling pathway;ko04110 Cell cycle;ko04115 p53 signaling pathway;ko05200 Pathways in cancer;ko05206 MicroRNAs in cancer;ko05203 Viral carcinogenesis;ko05212 Pancreatic cancer;ko05214 Glioma;ko05220 Chronic myeloid leukemia;ko05218 Melanoma;ko05224 Breast cancer;ko05222 Small cell lung cancer;ko05223 Non-small cell lung cancer;ko05162 Measles;ko05161 Hepatitis B	KOG0594-Protein kinase PCTAIRE and related kinases[R]
ENSG00000147113	4.45673	11.4054	-1.35566	0.00231153	0.0430081	down	CXorf36	chromosome X open reading frame 36 [Source:HGNC Symbol;Acc:HGNC:25866]	GO:0005576;GO:0009966	-	-
ENSG00000101224	134.456	23.6318	2.50833	4.9e-05	0.00237555	up	CDC25B	cell division cycle 25B [Source:HGNC Symbol;Acc:HGNC:1726]	GO:1902751;GO:0005737;GO:0005634;GO:0045860;GO:0007144;GO:0001556;GO:0000278;GO:0005515;GO:0004721;GO:0035335;GO:0006470;GO:0004725;GO:0051301;GO:0005622;GO:0016787;GO:0007049;GO:0005856;GO:0000922;GO:0005813;GO:0005815;GO:0005829;GO:0005654;GO:0000086;GO:0006468;GO:0032467;GO:0019901;GO:0008284;GO:0045931	K05866-ko04010 MAPK signaling pathway;ko04110 Cell cycle;ko04914 Progesterone-mediated oocyte maturation;ko05206 MicroRNAs in cancer	KOG3772-M-phase inducer phosphatase[D]
ENSG00000004799	1.72041	15.7343	-3.19309	3.42e-06	0.000307187	down	PDK4	pyruvate dehydrogenase kinase 4 [Source:HGNC Symbol;Acc:HGNC:8812]	GO:0005743;GO:0005739;GO:0046320;GO:0045124;GO:0042594;GO:0042593;GO:0042304;GO:0010906;GO:0010565;GO:0010510;GO:0008286;GO:0006885;GO:0006468;GO:0016310;GO:0016301;GO:0016740;GO:0005524;GO:0000166;GO:0005759;GO:0005975;GO:0009267;GO:0006006;GO:0004672;GO:0071398;GO:0072593;GO:2000811;GO:0004740	-	KOG0787-Dehydrogenase kinase[T]
ENSG00000168350	2.6466	14.5115	-2.45498	1.63e-08	3.5e-06	down	DEGS2	delta 4-desaturase, sphingolipid 2 [Source:HGNC Symbol;Acc:HGNC:20113]	GO:0046513;GO:0030148;GO:0006667;GO:0042284;GO:0000170;GO:0006629;GO:0005789;GO:0005783;GO:0055114;GO:0016491;GO:0016021;GO:0016020	K04712-ko00600 Sphingolipid metabolism;ko04071 Sphingolipid signaling pathway	KOG2987-Fatty acid desaturase[I]
ENSG00000145194	29.1146	7.93725	1.87503	8.22e-05	0.00353322	up	ECE2	endothelin converting enzyme 2 [Source:HGNC Symbol;Acc:HGNC:13275]	GO:0006508;GO:0008233;GO:0008152;GO:0003824;GO:0005515;GO:0005794;GO:0016787;GO:0032259;GO:0016740;GO:0008168;GO:0046872;GO:0016021;GO:0016020;GO:0000139;GO:0004222;GO:0008237;GO:0030659;GO:0007507;GO:0016486;GO:0007420;GO:0007267;GO:0010002;GO:0030658	-	KOG2352-Predicted spermine/spermidine synthase[E]
ENSG00000113430	55.0085	4.84858	3.50402	1.8e-06	0.000191599	up	IRX4	iroquois homeobox 4 [Source:HGNC Symbol;Acc:HGNC:6129]	GO:0043565;GO:0003677;GO:0006355;GO:0005634;GO:0007507;GO:0048561	-	KOG0773-Transcription factor MEIS1 and related HOX domain proteins[K]
ENSG00000169248	10.1347	0.701208	3.85332	0.000298558	0.00972885	up	CXCL11	C-X-C motif chemokine ligand 11 [Source:HGNC Symbol;Acc:HGNC:10638]	GO:0006955;GO:0008009;GO:0005576;GO:0005515;GO:0005623;GO:0006935;GO:0006954;GO:0005125;GO:0005615;GO:0006952;GO:0007186;GO:0008201;GO:0042127;GO:0007165;GO:0007267;GO:0032496;GO:0010818;GO:0048248;GO:0002690;GO:0030816;GO:0043950;GO:0051281;GO:0070098	K12672-ko04060 Cytokine-cytokine receptor interaction;ko04620 Toll-like receptor signaling pathway;ko04062 Chemokine signaling pathway	-
ENSG00000169245	49.6208	5.18071	3.25972	0.00144023	0.0301776	up	CXCL10	C-X-C motif chemokine ligand 10 [Source:HGNC Symbol;Acc:HGNC:10637]	GO:0009897;GO:0005615;GO:1901740;GO:0051607;GO:0045662;GO:0034605;GO:0032496;GO:0033280;GO:0030335;GO:0016525;GO:0010996;GO:0010332;GO:0009615;GO:0009409;GO:0008284;GO:0006955;GO:0002690;GO:0008009;GO:0045859;GO:0005576;GO:0005515;GO:0007186;GO:0006935;GO:0005125;GO:0006954;GO:0006952;GO:0060326;GO:0008201;GO:0045944;GO:0042127;GO:0007165;GO:0007267;GO:0007166;GO:0005102;GO:0010818;GO:2000406;GO:…	K12671-ko04668 TNF signaling pathway;ko04060 Cytokine-cytokine receptor interaction;ko04620 Toll-like receptor signaling pathway;ko04622 RIG-I-like receptor signaling pathway;ko04623 Cytosolic DNA-sensing pathway;ko04062 Chemokine signaling pathway;ko05164 Influenza A	-
ENSG00000117228	76.1916	14.5423	2.38938	0.00118123	0.0265044	up	GBP1	guanylate binding protein 1 [Source:HGNC Symbol;Acc:HGNC:4182]	GO:0019003;GO:0051260;GO:0042803;GO:0005525;GO:0003924;GO:0005576;GO:0005886;GO:0005829;GO:0003779;GO:0005794;GO:0016787;GO:0000166;GO:0016020;GO:0005737;GO:0000139;GO:0002376;GO:0042802;GO:0051607;GO:0005515;GO:0019899;GO:0060333;GO:0070373;GO:1900025;GO:1903076;GO:0051879;GO:1903077;GO:0050860;GO:0019955;GO:1900041;GO:0030507;GO:0050848	-	KOG2037-Guanylate-binding protein[R]
ENSG00000115267	37.5782	8.34489	2.17093	0.00221776	0.0417515	up	IFIH1	interferon induced with helicase C domain 1 [Source:HGNC Symbol;Acc:HGNC:18873]	GO:0005515;GO:0016787;GO:0008270;GO:0004386;GO:0003677;GO:0005524;GO:0000166;GO:0046872;GO:0005737;GO:0005634;GO:0003723;GO:0002376;GO:0045087;GO:0042802;GO:0051607;GO:0005829;GO:0016579;GO:0009615;GO:0016925;GO:0043021;GO:0016032;GO:0032727;GO:0032728;GO:0032480;GO:0003725;GO:0003727;GO:0009597;GO:0034344;GO:0039528;GO:0039530	K12647-ko04622 RIG-I-like receptor signaling pathway;ko05162 Measles;ko05164 Influenza A;ko05161 Hepatitis B;ko05168 Herpes simplex infection	KOG0354-DEAD-box like helicase[R]
ENSG00000266714	8.98936	29.7514	-1.72667	0.00224149	0.0420297	down	MYO15B	myosin XVB [Source:HGNC Symbol;Acc:HGNC:14083]	GO:0005903;GO:0005856;GO:0016459;GO:0003774;GO:0005524	-	-
ENSG00000153064	1.73968	8.28707	-2.25204	5.1e-05	0.00246126	down	BANK1	B-cell scaffold protein with ankyrin repeats 1 [Source:HGNC Symbol;Acc:HGNC:18233]	GO:0042113;GO:1900165;GO:0051898;GO:0050869;GO:0045947;GO:0043410	-	-
ENSG00000197540	1.11055	5.54354	-2.31953	0.00121179	0.0269406	down	GZMM	granzyme M [Source:HGNC Symbol;Acc:HGNC:4712]	GO:0004252;GO:0006508;GO:0008233;GO:0016787;GO:0008236;GO:0008219;GO:0019835;GO:0004175;GO:0005576;GO:0016020;GO:0006915;GO:0002376;GO:0045087;GO:0005515	-	KOG3627-Trypsin[E]
ENSG00000125538	61.1582	5.20428	3.55478	0.000147544	0.00569273	up	IL1B	interleukin 1 beta [Source:HGNC Symbol;Acc:HGNC:5992]	GO:0006955;GO:0005576;GO:0006954;GO:0005149;GO:0031982;GO:0030141;GO:0005615;GO:2000778;GO:0097192;GO:0070164;GO:0050999;GO:0050996;GO:0050900;GO:0050691;GO:0046627;GO:0046330;GO:0045944;GO:0045833;GO:0045766;GO:0045410;GO:0045080;GO:0043407;GO:0043123;GO:0035234;GO:0033198;GO:0032755;GO:0032611;GO:0032496;GO:0032308;GO:0031622;GO:0030593;GO:0010829;GO:0010628;GO:0010575;GO:0009743;GO:0005125;GO:…	K04519-ko04010 MAPK signaling pathway;ko04064 NF-kappa B signaling pathway;ko04668 TNF signaling pathway;ko04060 Cytokine-cytokine receptor interaction;ko04640 Hematopoietic cell lineage;ko04620 Toll-like receptor signaling pathway;ko04621 NOD-like receptor signaling pathway;ko04623 Cytosolic DNA-sensing pathway;ko04750 Inflammatory mediator regulation of TRP channels;ko04380 Osteoclast different…	-
ENSG00000124664	0.565201	37.7027	-6.05976	0.00166664	0.0337194	down	SPDEF	SAM pointed domain containing ETS transcription factor [Source:HGNC Symbol;Acc:HGNC:17257]	GO:0005634;GO:0060576;GO:0060480;GO:0045944;GO:0010455;GO:0010454;GO:0000122;GO:0043565;GO:0006355;GO:0006351;GO:0003700;GO:0003677;GO:0000981;GO:0030154;GO:0007275;GO:0043065	-	KOG3805-ERG and related ETS transcription factors[K]
ENSG00000136231	38.0936	4.65166	3.03373	5.18e-06	0.000422907	up	IGF2BP3	insulin like growth factor 2 mRNA binding protein 3 [Source:HGNC Symbol;Acc:HGNC:28868]	GO:0005829;GO:0005737;GO:0005634;GO:0051028;GO:0006810;GO:0003723;GO:0003676;GO:0005515;GO:0043488;GO:0006417;GO:0017148;GO:0003730;GO:0045182;GO:0048027;GO:0006412;GO:0009653;GO:0042035	-	KOG2193-IGF-II mRNA-binding protein IMP, contains RRM and KH domains[AR]
ENSG00000136235	444.991	67.0939	2.72952	7.07e-05	0.00314192	up	GPNMB	glycoprotein nmb [Source:HGNC Symbol;Acc:HGNC:4462]	GO:0042470;GO:0005886;GO:0016021;GO:0016020;GO:2000273;GO:0005887;GO:0005515;GO:0008285;GO:1901215;GO:0048018;GO:0030335;GO:0001934;GO:0042130;GO:0007165;GO:0005178;GO:0008201;GO:0042056;GO:0045545;GO:0001818;GO:0007267;GO:0031954;GO:0034103;GO:0045765;GO:0050868;GO:0050918;GO:0070374;GO:2000134;GO:0031410;GO:0032720;GO:0030282;GO:0007155;GO:0001649	-	-
ENSG00000127586	24.6829	9.02145	1.45208	0.00191608	0.0375358	up	CHTF18	chromosome transmission fidelity factor 18 [Source:HGNC Symbol;Acc:HGNC:18435]	GO:0003677;GO:0005654;GO:0005829;GO:0005524;GO:0000166;GO:0016020;GO:0005634;GO:0007049;GO:0006260;GO:0005515;GO:0043142;GO:0003689;GO:1900264;GO:0031390	-	KOG1969-DNA replication checkpoint protein CHL12/CTF18[DL]
ENSG00000165891	6.14043	1.66258	1.88492	0.00221972	0.0417515	up	E2F7	E2F transcription factor 7 [Source:HGNC Symbol;Acc:HGNC:23820]	GO:0005634;GO:2000134;GO:0070365;GO:0060718;GO:0060707;GO:0032877;GO:0032466;GO:0008285;GO:0006355;GO:0002040;GO:0001890;GO:0000122;GO:0003714;GO:0003700;GO:0001227;GO:0001047;GO:0000977;GO:0005515;GO:0006351;GO:0003677;GO:0016607;GO:0005667;GO:0007049;GO:0006974;GO:0042802;GO:0045944;GO:0006977;GO:0005654;GO:0030330;GO:0071930	-	KOG2578-Transcription factor E2F/dimerization partner (TDP)-like proteins[K]
ENSG00000105880	22.2505	2.57327	3.11217	7.24e-05	0.00319485	up	DLX5	distal-less homeobox 5 [Source:HGNC Symbol;Acc:HGNC:2918]	GO:0005737;GO:0005634;GO:0000790;GO:1901522;GO:0097376;GO:0090263;GO:0071773;GO:0060349;GO:0060325;GO:0060322;GO:0060166;GO:0060021;GO:0050679;GO:0048646;GO:0045944;GO:0045893;GO:0043583;GO:0042472;GO:0030855;GO:0030509;GO:0030326;GO:0021889;GO:0010628;GO:0007411;GO:0007409;GO:0006355;GO:0001958;GO:0001649;GO:0071837;GO:0044212;GO:0003677;GO:0001077;GO:0000978;GO:0043565;GO:0006351;GO:0006366;GO:…	K18489-ko04550 Signaling pathways regulating pluripotency of stem cells	KOG0850-Transcription factor DLX and related proteins with LIM Zn-binding and HOX domains[K]
ENSG00000198513	1.72143	5.06735	-1.55762	0.00126953	0.0279134	down	ATL1	atlastin GTPase 1 [Source:HGNC Symbol;Acc:HGNC:11231]	GO:0003924;GO:0005515;GO:0005525;GO:0005794;GO:0016787;GO:0005789;GO:0005783;GO:0000166;GO:0016021;GO:0016020;GO:0000139;GO:0042995;GO:0042802;GO:0007409;GO:0030424;GO:0007029;GO:0051260;GO:0071782;GO:0000137;GO:0005737	-	KOG2037-Guanylate-binding protein[R]
ENSG00000188064	62.1716	12.6566	2.29637	1.28e-05	0.000820992	up	WNT7B	Wnt family member 7B [Source:HGNC Symbol;Acc:HGNC:12787]	GO:0005886;GO:0005737;GO:0005615;GO:0051384;GO:0048812;GO:0046330;GO:0032536;GO:0031175;GO:0007257;GO:0005576;GO:0007275;GO:0005102;GO:0016055;GO:0005578;GO:0030666;GO:0050808;GO:0005796;GO:0042592;GO:0005109;GO:0030182;GO:0045165;GO:0071300;GO:0005788;GO:0070307;GO:0070062;GO:0001701;GO:0060070;GO:0060425;GO:0045669;GO:0061180;GO:0030324;GO:0072205;GO:0072207;GO:0072236;GO:0048568;GO:0032364;GO:…	K00572-ko04310 Wnt signaling pathway;ko04390 Hippo signaling pathway;ko04150 mTOR signaling pathway;ko04550 Signaling pathways regulating pluripotency of stem cells;ko04916 Melanogenesis;ko05200 Pathways in cancer;ko05205 Proteoglycans in cancer;ko05217 Basal cell carcinoma;ko05224 Breast cancer;ko05166 HTLV-I infection	KOG3913-Wnt family of developmental regulators[T]
ENSG00000116299	2.10231	59.0104	-4.81093	8.06e-08	1.4e-05	down	KIAA1324	KIAA1324 [Source:HGNC Symbol;Acc:HGNC:29618]	GO:0005886;GO:0005765;GO:0005794;GO:0016021;GO:0016020;GO:0003723;GO:0006914;GO:0005764;GO:0005768;GO:0031902;GO:0070062;GO:0005770;GO:0005887;GO:0005802;GO:0009267;GO:0000045;GO:0044090;GO:2000786	-	-
ENSG00000143416	4.84131	50.727	-3.38928	7.54e-11	3.49e-08	down	SELENBP1	selenium binding protein 1 [Source:HGNC Symbol;Acc:HGNC:10719]	GO:0005515;GO:0005829;GO:0001650;GO:0005730;GO:0015031;GO:0016020;GO:0005737;GO:0005634;GO:0006810;GO:0005615;GO:0070062;GO:0008430	-	KOG0918-Selenium-binding protein[P]
ENSG00000107159	43.9164	0.196289	7.80564	1.61e-13	1.43e-10	up	CA9	carbonic anhydrase 9 [Source:HGNC Symbol;Acc:HGNC:1383]	GO:0016323;GO:0046903;GO:0042493;GO:0033574;GO:0002009;GO:0001666;GO:0005886;GO:0006730;GO:0016829;GO:0046872;GO:0008270;GO:0016021;GO:0016020;GO:0005634;GO:0004089;GO:0042995;GO:0005730;GO:0061418;GO:0031528;GO:0015701	K01672-ko00910 Nitrogen metabolism	KOG0382-Carbonic anhydrase[R]
ENSG00000111602	19.6757	5.69006	1.7899	0.000603643	0.0162383	up	TIMELESS	timeless circadian clock [Source:HGNC Symbol;Acc:HGNC:11813]	GO:0005634;GO:0048754;GO:0042752;GO:0030324;GO:0007623;GO:0006974;GO:0002009;GO:0000122;GO:0046982;GO:0042803;GO:0048511;GO:0005515;GO:0051301;GO:0006355;GO:0006351;GO:0007275;GO:0007049;GO:0005654;GO:0045892;GO:0006260;GO:0044770;GO:0009582;GO:0072711;GO:2000781;GO:0072719;GO:1904976;GO:0000790;GO:0009628	-	KOG1974-DNA topoisomerase I-interacting protein[L]
ENSG00000162804	2.32103	9.21171	-1.9887	4.83e-07	6.32e-05	down	SNED1	sushi, nidogen and EGF like domains 1 [Source:HGNC Symbol;Acc:HGNC:24696]	GO:0005576;GO:0005509;GO:0007160;GO:0070062	-	KOG1217-Fibrillins and related proteins containing Ca2+-binding EGF-like domains[T]
ENSG00000213896	0.588664	7.99639	-3.76383	1.1e-05	0.000731784	down	AC109486.1	-	-	-	-
ENSG00000168062	19.2827	2.51395	2.93927	0.00179247	0.0356363	up	BATF2	basic leucine zipper ATF-like transcription factor 2 [Source:HGNC Symbol;Acc:HGNC:25163]	GO:0043011;GO:0042832;GO:0005515;GO:0043565;GO:0006355;GO:0006351;GO:0003700;GO:0003677;GO:0006357;GO:0005634;GO:0030154	-	KOG1414-Transcriptional activator FOSB/c-Fos and related bZIP transcription factors[K]
ENSG00000104341	30.1103	11.796	1.35197	0.00282309	0.0497939	up	LAPTM4B	lysosomal protein transmembrane 4 beta [Source:HGNC Symbol;Acc:HGNC:13646]	GO:0005515;GO:0016021;GO:0016020;GO:0006810;GO:0012505	-	-
ENSG00000167900	129.586	23.8356	2.44272	2.41e-06	0.000237061	up	TK1	thymidine kinase 1 [Source:HGNC Symbol;Acc:HGNC:11830]	GO:0004797;GO:0005515;GO:0008270;GO:0016310;GO:0016301;GO:0016740;GO:0005524;GO:0000166;GO:0046872;GO:0005737;GO:0009165;GO:0042802;GO:0005829;GO:0009157;GO:0071897;GO:0019206;GO:0006139;GO:0043097;GO:0051289;GO:0006259;GO:0046104	K00857-ko00240 Pyrimidine metabolism;ko00983 Drug metabolism - other enzymes	KOG3125-Thymidine kinase[F]
ENSG00000163815	7.91342	65.9362	-3.0587	3.05e-05	0.00161094	down	CLEC3B	C-type lectin domain family 3 member B [Source:HGNC Symbol;Acc:HGNC:11891]	GO:0001503;GO:0005576;GO:0030246;GO:0005737;GO:0005615;GO:0005509;GO:0008201;GO:0070062;GO:0030282;GO:0031012;GO:0002576;GO:0071560;GO:0001652;GO:0031089;GO:0036143;GO:0010756;GO:0071310	-	-
ENSG00000094755	8.79704	65.7483	-2.90186	6.56e-05	0.00298148	down	GABRP	gamma-aminobutyric acid type A receptor pi subunit [Source:HGNC Symbol;Acc:HGNC:4089]	GO:0034220;GO:0006811;GO:0016020;GO:0006810;GO:0016021;GO:0004890;GO:0005230;GO:0007165;GO:0005886;GO:0030054;GO:0045202;GO:0045211;GO:0005254;GO:0006821;GO:0034707;GO:1902476;GO:1902711	K05189-ko04080 Neuroactive ligand-receptor interaction;ko04727 GABAergic synapse;ko04723 Retrograde endocannabinoid signaling;ko05032 Morphine addiction;ko05033 Nicotine addiction	KOG3643-GABA receptor[T]
ENSG00000091986	7.27897	22.0305	-1.5977	0.00255647	0.0461392	down	CCDC80	coiled-coil domain containing 80 [Source:HGNC Symbol;Acc:HGNC:30649]	GO:0005615;GO:0005614;GO:0005604;GO:0005578;GO:0030198;GO:0010811;GO:0008201;GO:0005539;GO:0001968;GO:0005576;GO:0016021;GO:0016020	-	-
ENSG00000130822	10.8463	0.733337	3.88658	2.56e-06	0.000247949	up	PNCK	pregnancy up-regulated nonubiquitous CaM kinase [Source:HGNC Symbol;Acc:HGNC:13415]	GO:0016310;GO:0016301;GO:0016740;GO:0006468;GO:0005524;GO:0004674;GO:0000166;GO:0004672;GO:0005737;GO:0005634;GO:0005622;GO:0005516;GO:0035556;GO:0018105;GO:0018107;GO:0004683	-	KOG0032-Ca2+/calmodulin-dependent protein kinase, EF-Hand protein superfamily[T]
ENSG00000130829	8.31246	0.95114	3.12755	0.0013555	0.0291645	up	DUSP9	dual specificity phosphatase 9 [Source:HGNC Symbol;Acc:HGNC:3076]	GO:0017017;GO:0005515;GO:0004721;GO:0035335;GO:0016311;GO:0016791;GO:0006470;GO:0008138;GO:0016787;GO:0005737;GO:0004725;GO:0005829;GO:0000165;GO:0005634;GO:0000187;GO:0007254;GO:0000188	K18498-ko04010 MAPK signaling pathway;ko04550 Signaling pathways regulating pluripotency of stem cells	KOG1717-Dual specificity phosphatase[V]
ENSG00000137441	224.313	3.15945	6.1497	0.00047964	0.0138463	up	FGFBP2	fibroblast growth factor binding protein 2 [Source:HGNC Symbol;Acc:HGNC:29451]	GO:0005576;GO:0005615;GO:0019838	-	-
ENSG00000117091	11.5173	40.0047	-1.79636	6.99e-05	0.00311841	down	CD48	CD48 molecule [Source:HGNC Symbol;Acc:HGNC:1683]	GO:0005515;GO:0005886;GO:0016020;GO:0031225;GO:0045121;GO:0004872;GO:0050900;GO:0002819;GO:0070062;GO:0005887;GO:0006952;GO:0046658;GO:0043234;GO:0009897;GO:0045576;GO:0042110;GO:0007165;GO:0003823	K06479-ko04650 Natural killer cell mediated cytotoxicity	-
ENSG00000135549	2.6018	10.4191	-2.00164	0.000650647	0.0171765	down	PKIB	cAMP-dependent protein kinase inhibitor beta [Source:HGNC Symbol;Acc:HGNC:9018]	GO:0004860;GO:0004862;GO:0006469;GO:0005634;GO:0005737;GO:0032212;GO:0051973;GO:1904355;GO:2000480;GO:0071901	-	-
ENSG00000178372	216.187	44.3875	2.28406	0.000655011	0.017235	up	CALML5	calmodulin like 5 [Source:HGNC Symbol;Acc:HGNC:18180]	GO:0005509;GO:0046872;GO:0005576;GO:0070062;GO:0043312;GO:0007165;GO:1904813;GO:0008544	K02183-ko04014 Ras signaling pathway;ko04015 Rap1 signaling pathway;ko04020 Calcium signaling pathway;ko04070 Phosphatidylinositol signaling system;ko04024 cAMP signaling pathway;ko04022 cGMP - PKG signaling pathway;ko04114 Oocyte meiosis;ko04910 Insulin signaling pathway;ko04922 Glucagon signaling pathway;ko04912 GnRH signaling pathway;ko04915 Estrogen signaling pathway;ko04921 Oxytocin signalin…	KOG0027-Calmodulin and related proteins (EF-Hand superfamily)[T]
ENSG00000132530	91.7905	22.9289	2.00118	0.00175417	0.0349905	up	XAF1	XIAP associated factor 1 [Source:HGNC Symbol;Acc:HGNC:30932]	GO:0006915;GO:0046872;GO:0008270;GO:0005739;GO:0005634;GO:0005737;GO:0005829;GO:0060337;GO:0035456;GO:0031333	-	-
ENSG00000145604	19.9261	6.55052	1.60498	0.00171451	0.0344275	up	SKP2	S-phase kinase associated protein 2 [Source:HGNC Symbol;Acc:HGNC:10901]	GO:0005515;GO:0016567;GO:0005829;GO:0005730;GO:0005634;GO:0005737;GO:0042802;GO:0000209;GO:0016579;GO:0031145;GO:0005654;GO:0042981;GO:0000082;GO:0008283;GO:0004842;GO:0043687;GO:0019005;GO:1902916;GO:0071460;GO:0051726;GO:0048661;GO:0033148;GO:0006511;GO:0000086;GO:0061630;GO:0016310;GO:0016301	K03875-ko04120 Ubiquitin mediated proteolysis;ko04068 FoxO signaling pathway;ko04150 mTOR signaling pathway;ko04110 Cell cycle;ko05200 Pathways in cancer;ko05203 Viral carcinogenesis;ko05222 Small cell lung cancer;ko05168 Herpes simplex infection;ko05169 Epstein-Barr virus infection	KOG2120-SCF ubiquitin ligase, Skp2 component[O]
ENSG00000181333	6.95742	0.444737	3.96753	3.08e-09	8.63e-07	up	HEPHL1	hephaestin like 1 [Source:HGNC Symbol;Acc:HGNC:30477]	GO:0006811;GO:0055114;GO:0016491;GO:0046872;GO:0016021;GO:0016020;GO:0006810;GO:0005507;GO:0006825;GO:0004322	-	KOG1263-Multicopper oxidases[Q]
ENSG00000160862	7.91677	172.427	-4.44493	7.15e-06	0.000544663	down	AZGP1	alpha-2-glycoprotein 1, zinc-binding [Source:HGNC Symbol;Acc:HGNC:910]	GO:0005576;GO:0007155;GO:0071806;GO:0005634;GO:0090501;GO:0005615;GO:0003823;GO:0005886;GO:0070062;GO:0001895;GO:0055085;GO:0008285;GO:0005515;GO:0004540;GO:0001948;GO:0001580;GO:0008320;GO:0019882	-	-
ENSG00000156787	9.76557	2.55775	1.93283	0.00190883	0.0374242	up	TBC1D31	TBC1 domain family member 31 [Source:HGNC Symbol;Acc:HGNC:30888]	GO:0005813	-	KOG0295-WD40 repeat-containing protein[S]
ENSG00000123096	4.46651	13.8798	-1.63577	0.00157701	0.0322858	down	SSPN	sarcospan [Source:HGNC Symbol;Acc:HGNC:11322]	GO:0005887;GO:0016021;GO:0016020;GO:0016010;GO:0005886;GO:0030054;GO:0045202;GO:0045211;GO:0042383;GO:0006936;GO:0007155;GO:0030133	-	-
ENSG00000271134	5.48822	0.136372	5.33072	0.000384917	0.0116716	up	AC012498.2	-	-	-	-
ENSG00000179639	1.2006	14.0284	-3.54653	1.22e-05	0.000791664	down	FCER1A	Fc fragment of IgE receptor Ia [Source:HGNC Symbol;Acc:HGNC:3609]	GO:0009897;GO:0005887;GO:0050850;GO:0050731;GO:0045425;GO:0045401;GO:0043306;GO:0019370;GO:0007257;GO:0007166;GO:0007165;GO:0001820;GO:0001812;GO:0000187;GO:0019863;GO:0019767;GO:0005886;GO:0005622;GO:0016021;GO:0016020;GO:0038095;GO:0009986	K08089-ko04072 Phospholipase D signaling pathway;ko04071 Sphingolipid signaling pathway;ko04664 Fc epsilon RI signaling pathway;ko05310 Asthma	-
ENSG00000272398	151.423	672.389	-2.15071	5.84e-06	0.000461962	down	CD24	CD24 molecule [Source:HGNC Symbol;Acc:HGNC:1645]	GO:0007155	K06469-ko04640 Hematopoietic cell lineage	-
ENSG00000248554	16.8427	0.667525	4.65716	1.15e-05	0.000756284	up	AC114956.2	-	-	-	-
ENSG00000227028	0.727058	13.8028	-4.24674	5.25e-05	0.00251263	down	SLC8A1-AS1	SLC8A1 antisense RNA 1 [Source:HGNC Symbol;Acc:HGNC:44102]	-	-	-
ENSG00000076555	2.27596	6.46896	-1.50706	0.000739699	0.0185864	down	ACACB	acetyl-CoA carboxylase beta [Source:HGNC Symbol;Acc:HGNC:85]	GO:0005739;GO:2001295;GO:0097009;GO:0060421;GO:0050995;GO:0046322;GO:0045540;GO:0043086;GO:0042493;GO:0031999;GO:0031667;GO:0014070;GO:0010906;GO:0010884;GO:0010629;GO:0006633;GO:0006084;GO:0009374;GO:0005524;GO:0003989;GO:0008152;GO:0003824;GO:0005515;GO:0016874;GO:0004075;GO:0006631;GO:0006629;GO:0046872;GO:0000166;GO:0016020;GO:0005634;GO:0005829;GO:0012505;GO:0051289;GO:0005741;GO:0006768;GO:…	K01946-ko00620 Pyruvate metabolism;ko00640 Propanoate metabolism;ko00061 Fatty acid biosynthesis;ko00254 Aflatoxin biosynthesis;ko04910 Insulin signaling pathway;ko04922 Glucagon signaling pathway;ko04920 Adipocytokine signaling pathway;ko04931 Insulin resistance	KOG0368-Acetyl-CoA carboxylase[I]
ENSG00000092068	136.242	29.6928	2.19799	0.000489701	0.0141198	up	SLC7A8	solute carrier family 7 member 8 [Source:HGNC Symbol;Acc:HGNC:11066]	GO:0016020;GO:0016021;GO:0015171;GO:0003333;GO:0015807;GO:0015179;GO:0005886;GO:0005737;GO:0006810;GO:0006865;GO:0050900;GO:0005515;GO:0070062;GO:1902475;GO:0016323;GO:0005887;GO:0015297;GO:0019534;GO:1901998;GO:0009636;GO:0015101;GO:0042605;GO:0006520;GO:0015804;GO:0015175;GO:0015695;GO:0055065	K13781-ko04974 Protein digestion and absorption	KOG1287-Amino acid transporters[E]
ENSG00000162998	1.77685	23.2648	-3.71076	3.15e-06	0.000294833	down	FRZB	frizzled-related protein [Source:HGNC Symbol;Acc:HGNC:3959]	GO:0005615;GO:0090103;GO:0090090;GO:0070367;GO:0061053;GO:0061037;GO:0060029;GO:0042472;GO:0030178;GO:0014033;GO:0010721;GO:0017147;GO:0005576;GO:0007275;GO:0016055;GO:0030154;GO:0005515;GO:0008285;GO:0030308;GO:0016020;GO:0001501;GO:0043065;GO:0045600	-	KOG3577-Smoothened and related G-protein-coupled receptors[T]
ENSG00000283154	19.9279	3.67393	2.43939	0.00150548	0.0313004	up	IQCJ-SCHIP1	IQCJ-SCHIP1 readthrough [Source:HGNC Symbol;Acc:HGNC:38842]	GO:0005515;GO:0005737;GO:0042802;GO:0008150	-	KOG4847-Coiled coil protein involved in linking membrane proteins to cytoskeleton[R]
ENSG00000171217	10.063	0.36786	4.77376	7.05e-05	0.00313793	up	CLDN20	claudin 20 [Source:HGNC Symbol;Acc:HGNC:2042]	GO:0005886;GO:0005198;GO:0016021;GO:0016020;GO:0030054;GO:0005923;GO:0042802;GO:0016338	K06087-ko04514 Cell adhesion molecules (CAMs);ko04530 Tight junction;ko04670 Leukocyte transendothelial migration;ko05160 Hepatitis C	-
ENSG00000173210	2.2226	17.3728	-2.96651	4.35e-06	0.000368985	down	ABLIM3	actin binding LIM protein family member 3 [Source:HGNC Symbol;Acc:HGNC:29132]	GO:0005515;GO:0030036;GO:0006351;GO:0003779;GO:0046872;GO:0008270;GO:0005737;GO:0007010;GO:0030032;GO:0060271;GO:0001725;GO:0030027;GO:1903955;GO:0045944	K07520-ko04360 Axon guidance	KOG1044-Actin-binding LIM Zn-finger protein Limatin involved in axon guidance[TZ]
ENSG00000075702	7.36629	1.83145	2.00795	0.000835801	0.0204708	up	WDR62	WD repeat domain 62 [Source:HGNC Symbol;Acc:HGNC:24502]	GO:0005515;GO:0005737;GO:0005634;GO:0007399;GO:0005856;GO:0000922;GO:0005813;GO:0005815;GO:0005814;GO:0021987;GO:0005682;GO:0007099;GO:0007052;GO:0008380;GO:0022008;GO:0071011;GO:0071013	-	KOG1408-WD40 repeat protein[S]
ENSG00000101311	44.4899	8.54093	2.38101	1.67e-08	3.55e-06	up	FERMT1	fermitin family member 1 [Source:HGNC Symbol;Acc:HGNC:15889]	GO:0031941;GO:0005925;GO:2001203;GO:2000647;GO:0090090;GO:0071711;GO:0051886;GO:0042308;GO:0035414;GO:0033630;GO:0030511;GO:0010629;GO:0001954;GO:0005886;GO:0005829;GO:0007155;GO:0016020;GO:0005737;GO:0030054;GO:0005856;GO:0042995;GO:0043616;GO:0032587;GO:0090162;GO:0051546	-	KOG3727-Mitogen inducible gene product (contains ERM and PH domains)[D]
ENSG00000197084	28.6472	0.174685	7.35749	0.000661414	0.0173656	up	LCE1C	late cornified envelope 1C [Source:HGNC Symbol;Acc:HGNC:29464]	GO:0005737;GO:0008544;GO:0031424;GO:0005198;GO:0018149;GO:0030216;GO:0001533	-	-
ENSG00000158481	1.31668	7.52825	-2.51541	3.75e-05	0.00191857	down	CD1C	CD1c molecule [Source:HGNC Symbol;Acc:HGNC:1636]	GO:0005886;GO:0016021;GO:0016020;GO:0002376;GO:0005764;GO:0002250;GO:0050776;GO:0008289;GO:0005768;GO:0010008;GO:0005887;GO:0030881;GO:0048007;GO:0002286;GO:0030884;GO:0030883;GO:0051861;GO:0071723	K06448-ko04640 Hematopoietic cell lineage	-
ENSG00000130176	5.48609	19.9239	-1.86065	0.00139675	0.029751	down	CNN1	calponin 1 [Source:HGNC Symbol;Acc:HGNC:2155]	GO:0003779;GO:0005515;GO:0005925;GO:0005516;GO:0031032;GO:0006940;GO:0005856;GO:1904706	-	KOG2046-Calponin[Z]
ENSG00000145687	4.33079	9.5553	-1.14167	0.000852229	0.0208096	down	SSBP2	single stranded DNA binding protein 2 [Source:HGNC Symbol;Acc:HGNC:15831]	GO:0006355;GO:0003677;GO:0006366;GO:0005634;GO:0003697;GO:0005737;GO:0045944;GO:0000978;GO:0001077	-	KOG4594-Sequence-specific single-stranded-DNA-binding protein[LKR]
ENSG00000010932	2.777	9.79906	-1.81912	0.00159841	0.0325579	down	FMO1	flavin containing monooxygenase 1 [Source:HGNC Symbol;Acc:HGNC:3769]	GO:0005515;GO:0043231;GO:0005789;GO:0031090;GO:0005783;GO:0055114;GO:0050661;GO:0050660;GO:0016491;GO:0004499;GO:0004497;GO:0016021;GO:0016020;GO:0006805;GO:0005788;GO:0006082;GO:0009404;GO:0070995;GO:0032496;GO:0017144;GO:0006970	K00485-ko00982 Drug metabolism - cytochrome P450	KOG1399-Flavin-containing monooxygenase[Q]
ENSG00000100350	30.8642	7.57624	2.02638	7.96e-05	0.00346335	up	FOXRED2	FAD dependent oxidoreductase domain containing 2 [Source:HGNC Symbol;Acc:HGNC:26264]	GO:0005783;GO:0055114;GO:0016491;GO:0050660;GO:0005788;GO:0005515;GO:0030433;GO:0001948	-	KOG1399-Flavin-containing monooxygenase[Q]
ENSG00000116774	9.3371	32.7621	-1.81098	0.0024671	0.0450314	down	OLFML3	olfactomedin like 3 [Source:HGNC Symbol;Acc:HGNC:24956]	GO:0005576;GO:0007275;GO:1903561	-	KOG3545-Olfactomedin and related extracellular matrix glycoproteins[W]
ENSG00000163072	3.28971	11.4694	-1.80175	1.01e-05	0.000689428	down	NOSTRIN	nitric oxide synthase trafficking [Source:HGNC Symbol;Acc:HGNC:20203]	GO:0005515;GO:0005886;GO:0007165;GO:0016020;GO:0005737;GO:0005634;GO:0005856;GO:0031410;GO:0006897;GO:0050999;GO:0030666;GO:0045892;GO:0003677	-	-
ENSG00000168575	144.807	31.8656	2.18406	0.00111531	0.0253324	up	SLC20A2	solute carrier family 20 member 2 [Source:HGNC Symbol;Acc:HGNC:10947]	GO:0035725;GO:0006814;GO:0005886;GO:0006811;GO:0055085;GO:0015293;GO:0016020;GO:0016021;GO:0006810;GO:0046718;GO:0070062;GO:0005315;GO:0006817;GO:0035435;GO:0005887;GO:0016032;GO:0004872;GO:0005436;GO:0001618;GO:0015321;GO:0044341	-	KOG2493-Na+/Pi symporter[P]
ENSG00000159516	8.36976	0.368553	4.50524	2.15e-07	3.18e-05	up	SPRR2G	small proline rich protein 2G [Source:HGNC Symbol;Acc:HGNC:11267]	GO:0005737;GO:0031424;GO:0005829;GO:0001533;GO:0008544;GO:0030216;GO:0070268	-	-
ENSG00000171084	6.35947	1.11744	2.5087	0.000390673	0.0117868	up	FAM86JP	family with sequence similarity 86 member J, pseudogene [Source:HGNC Symbol;Acc:HGNC:44097]	-	-	-
ENSG00000204540	5.80336	0.854985	2.76292	0.0026441	0.0474008	up	PSORS1C1	psoriasis susceptibility 1 candidate 1 [Source:HGNC Symbol;Acc:HGNC:17202]	-	-	-
ENSG00000204542	26.2344	1.87766	3.80445	0.0012879	0.028163	up	C6orf15	chromosome 6 open reading frame 15 [Source:HGNC Symbol;Acc:HGNC:13927]	GO:0005614;GO:0005578;GO:0030198;GO:0070052;GO:0043236;GO:0008201;GO:0005540;GO:0005539;GO:0005518;GO:0001968;GO:0005576;GO:0003674;GO:0008150;GO:0005575	-	-
ENSG00000129991	5.21124	0.527322	3.30487	0.00157062	0.0322264	up	TNNI3	troponin I3, cardiac type [Source:HGNC Symbol;Acc:HGNC:11947]	GO:1990584;GO:0043292;GO:0030017;GO:0030016;GO:0005737;GO:0060048;GO:0010882;GO:0007507;GO:0006941;GO:0006940;GO:0006937;GO:0006874;GO:0001980;GO:0001570;GO:0051015;GO:0097512;GO:0005515;GO:0003779;GO:0046872;GO:0005861;GO:0005829;GO:0048306;GO:1903779;GO:0019904;GO:0019901;GO:0055010;GO:0030049;GO:0060047;GO:0019855;GO:0003009;GO:0030172;GO:0031014;GO:0032780	K12044-ko04024 cAMP signaling pathway;ko04260 Cardiac muscle contraction;ko04261 Adrenergic signaling in cardiomyocytes;ko05410 Hypertrophic cardiomyopathy (HCM);ko05414 Dilated cardiomyopathy (DCM)	KOG3977-Troponin I[Z]
ENSG00000136695	48.5909	4.67359	3.37808	0.000503929	0.0143411	up	IL36RN	interleukin 36 receptor antagonist [Source:HGNC Symbol;Acc:HGNC:15561]	GO:0006955;GO:0005576;GO:0005515;GO:0005615;GO:0006954;GO:0005125;GO:0005149;GO:0005152;GO:0001960;GO:0002376;GO:0045087;GO:0019732;GO:0032700;GO:1902714;GO:0032715	-	-
ENSG00000128713	8.96086	0.332624	4.75167	8.71e-06	0.000622372	up	HOXD11	homeobox D11 [Source:HGNC Symbol;Acc:HGNC:5134]	GO:0043565;GO:0006355;GO:0006351;GO:0003677;GO:0005654;GO:0005634;GO:0007275;GO:0009953;GO:0001658	-	KOG0487-Transcription factor Abd-B, contains HOX domain[K]
ENSG00000128710	12.3366	2.26148	2.4476	7.85e-05	0.00342318	up	HOXD10	homeobox D10 [Source:HGNC Symbol;Acc:HGNC:5133]	GO:0050905;GO:0048935;GO:0048704;GO:0045944;GO:0035137;GO:0035136;GO:0030326;GO:0021520;GO:0010468;GO:0009954;GO:0009952;GO:0008344;GO:0007519;GO:0007338;GO:0001501;GO:0003700;GO:0003682;GO:0003677;GO:0043565;GO:0006355;GO:0006351;GO:0005654;GO:0005829;GO:0005634;GO:0007275;GO:0000932	K09295-ko05206 MicroRNAs in cancer;ko05205 Proteoglycans in cancer	KOG0487-Transcription factor Abd-B, contains HOX domain[K]
ENSG00000131781	1.37958	5.22485	-1.92116	0.000978419	0.0230043	down	FMO5	flavin containing monooxygenase 5 [Source:HGNC Symbol;Acc:HGNC:3773]	GO:0055114;GO:0050661;GO:0050660;GO:0016491;GO:0004499;GO:0004497;GO:0043231;GO:0005789;GO:0031090;GO:0005783;GO:0005829;GO:0016021;GO:0016020;GO:0008150	K00485-ko00982 Drug metabolism - cytochrome P450	KOG1399-Flavin-containing monooxygenase[Q]
ENSG00000066279	12.9075	2.86117	2.17352	0.00223596	0.0419587	up	ASPM	abnormal spindle microtubule assembly [Source:HGNC Symbol;Acc:HGNC:19048]	GO:0097431;GO:0072687;GO:0030496;GO:0005874;GO:0005737;GO:0000922;GO:0097150;GO:0090306;GO:0090263;GO:0051661;GO:0051445;GO:0048589;GO:0048477;GO:0045769;GO:0045665;GO:0021987;GO:0021873;GO:0008584;GO:0007420;GO:0007283;GO:0002052;GO:0001764;GO:0005516;GO:0051301;GO:0005634;GO:0007049;GO:0005856;GO:0005819;GO:0007051;GO:0051653;GO:0036449	-	KOG0165-Microtubule-associated protein Asp[Z]
ENSG00000125864	6.60025	1.22992	2.42396	0.000345344	0.0107981	up	BFSP1	beaded filament structural protein 1 [Source:HGNC Symbol;Acc:HGNC:1040]	GO:0005882;GO:0005737;GO:0070307;GO:0048469;GO:0005212;GO:0007010;GO:0005515;GO:0005886;GO:0005198;GO:0016020;GO:0005856;GO:0008150;GO:0005938;GO:0005200	-	-
ENSG00000137959	73.9601	4.52792	4.02983	5.87e-07	7.4e-05	up	IFI44L	interferon induced protein 44 like [Source:HGNC Symbol;Acc:HGNC:17817]	GO:0005525;GO:0005737;GO:0051607	-	-
ENSG00000160949	23.8943	5.37051	2.15353	8.61e-05	0.00365553	up	TONSL	tonsoku like, DNA repair protein [Source:HGNC Symbol;Acc:HGNC:7801]	GO:0016604;GO:0005515;GO:0005654;GO:0005737;GO:0005634;GO:0006281;GO:0006974;GO:1903507;GO:0031297;GO:0042393;GO:0042994;GO:0003714;GO:0000724;GO:0005662;GO:0042555;GO:0043596;GO:0035101	-	KOG0504-FOG: Ankyrin repeat[R]
ENSG00000166451	25.9507	5.72025	2.18162	0.0015458	0.0319182	up	CENPN	centromere protein N [Source:HGNC Symbol;Acc:HGNC:30873]	GO:0005694;GO:0005634;GO:0007059;GO:0000775;GO:0034508;GO:0000776;GO:0000777;GO:0005829;GO:0005654;GO:0034080;GO:0007062	-	-
ENSG00000126233	54.2552	417.839	-2.94512	0.00108554	0.0247964	down	SLURP1	secreted LY6/PLAUR domain containing 1 [Source:HGNC Symbol;Acc:HGNC:18746]	GO:0050884;GO:0030336;GO:0010839;GO:0008285;GO:0007626;GO:0005576;GO:0007155;GO:0005125;GO:0005615;GO:0070062;GO:0001775	-	-
ENSG00000155085	1.23651	5.76748	-2.22166	3.09e-06	0.000290856	down	AK9	adenylate kinase 9 [Source:HGNC Symbol;Acc:HGNC:33814]	GO:0006139;GO:0005524;GO:0016310;GO:0019205;GO:0031965;GO:0016301;GO:0016740;GO:0005654;GO:0005634;GO:0000166;GO:0005737;GO:0009117;GO:0004550;GO:0005829;GO:0019206;GO:0015949;GO:0050145;GO:0006174;GO:0006186;GO:0006756;GO:0006757;GO:0061508;GO:0061565;GO:0061566;GO:0061567;GO:0061568;GO:0061569;GO:0061570;GO:0061571	K18533-ko00230 Purine metabolism;ko00240 Pyrimidine metabolism	KOG3078-Adenylate kinase[F]
ENSG00000172724	17.8096	153.677	-3.10917	3.04e-05	0.001606	down	CCL19	C-C motif chemokine ligand 19 [Source:HGNC Symbol;Acc:HGNC:10617]	GO:0006955;GO:0005576;GO:0005623;GO:0005622;GO:0005125;GO:0005615;GO:0006954;GO:0008009;GO:0006935;GO:0060326;GO:0007186;GO:0002548;GO:0043547;GO:0048247;GO:0070098;GO:0071346;GO:0071347;GO:0071356;GO:0051897;GO:0070374;GO:0098586;GO:0032735;GO:0032760;GO:0042346;GO:0042379;GO:0048020;GO:0046330;GO:0031732;GO:0001768;GO:0001771;GO:0002407;GO:0002606;GO:0010560;GO:0031295;GO:0034695;GO:0043123;GO:…	K05512-ko04064 NF-kappa B signaling pathway;ko04060 Cytokine-cytokine receptor interaction;ko04062 Chemokine signaling pathway	-
ENSG00000149131	68.9183	189.812	-1.46161	0.00123613	0.0273289	down	SERPING1	serpin family G member 1 [Source:HGNC Symbol;Acc:HGNC:1228]	GO:0005615;GO:0007568;GO:0004867;GO:0005576;GO:0005515;GO:0010951;GO:0002376;GO:0045087;GO:0030414;GO:0010466;GO:0070062;GO:0072562;GO:0006958;GO:0002576;GO:0007596;GO:0007599;GO:0031093;GO:0008015;GO:0007597;GO:0042730;GO:0030449;GO:0001869	K04001-ko04610 Complement and coagulation cascades;ko05133 Pertussis	KOG2392-Serpin[V]
ENSG00000020181	9.94491	24.0574	-1.27445	0.00102881	0.0238936	down	ADGRA2	adhesion G protein-coupled receptor A2 [Source:HGNC Symbol;Acc:HGNC:17849]	GO:0007165;GO:0004871;GO:0005515;GO:0005886;GO:0007186;GO:0004930;GO:0016020;GO:0016021;GO:0004888;GO:0007166;GO:0042995;GO:0002040;GO:0030175;GO:0001525;GO:0043542;GO:0045765;GO:0007417;GO:0050920;GO:0009986;GO:1900747;GO:0090210;GO:0010595	-	KOG0619-FOG: Leucine rich repeat[R]
ENSG00000153814	1.87144	5.48382	-1.55103	0.00123036	0.0272513	down	JAZF1	JAZF zinc finger 1 [Source:HGNC Symbol;Acc:HGNC:28917]	GO:0001650;GO:0005829;GO:0005634;GO:0003676;GO:0006629;GO:0006355;GO:0006351;GO:0046872;GO:0000981;GO:0000122;GO:0003714;GO:0017053	-	KOG4124-Putative transcriptional repressor regulating G2/M transition[KD]
ENSG00000150540	2.63324	12.2281	-2.21529	6.4e-07	7.99e-05	down	HNMT	histamine N-methyltransferase [Source:HGNC Symbol;Acc:HGNC:5028]	GO:0032259;GO:0016740;GO:0008168;GO:0005737;GO:0008170;GO:0005829;GO:0070062;GO:0006548;GO:0043005;GO:0007420;GO:1903955;GO:0007585;GO:0046539;GO:0001695;GO:0070555;GO:0051384;GO:0042220;GO:0035902;GO:0014075;GO:0006972;GO:0002347	K00546-ko00340 Histidine metabolism	-
ENSG00000111885	6.91981	24.8555	-1.84476	8.64e-05	0.00366208	down	MAN1A1	mannosidase alpha class 1A member 1 [Source:HGNC Symbol;Acc:HGNC:6821]	GO:0000139;GO:0016798;GO:0008152;GO:0005794;GO:0005509;GO:0016787;GO:0005829;GO:0016020;GO:0016021;GO:0004571;GO:0006486;GO:0070062;GO:0005783;GO:0005793;GO:1904381;GO:0015923;GO:0006491	K01230-ko00510 N-Glycan biosynthesis;ko00513 Various types of N-glycan biosynthesis;ko04141 Protein processing in endoplasmic reticulum	KOG2431-1, 2-alpha-mannosidase[G]
ENSG00000127423	9.19714	1.20038	2.93769	8.1e-08	1.4e-05	up	AUNIP	aurora kinase A and ninein interacting protein [Source:HGNC Symbol;Acc:HGNC:28363]	GO:0005813;GO:0005737;GO:0005856;GO:0000922;GO:0005815;GO:0005515;GO:0007051	-	-
ENSG00000154783	3.61539	8.26978	-1.1937	0.00121186	0.0269406	down	FGD5	FYVE, RhoGEF and PH domain containing 5 [Source:HGNC Symbol;Acc:HGNC:19117]	GO:0005515;GO:0043547;GO:0035023;GO:0005089;GO:0005886;GO:0005794;GO:0046872;GO:0005783;GO:0016020;GO:0005737;GO:0005856;GO:0005085;GO:0042995;GO:0005768;GO:0007010;GO:0030027;GO:0001726;GO:0005769;GO:0008360;GO:0030036;GO:0043087;GO:0032587;GO:0046847;GO:0031267	-	KOG1729-FYVE finger containing protein[R]
ENSG00000161055	64.84	3745.95	-5.8523	9.59e-08	1.59e-05	down	SCGB3A1	secretoglobin family 3A member 1 [Source:HGNC Symbol;Acc:HGNC:18384]	GO:1901741;GO:0005576;GO:0005125;GO:0005615;GO:0070062;GO:0042127;GO:0030308	-	-
ENSG00000119938	3.31785	21.3379	-2.6851	0.00069054	0.0177992	down	PPP1R3C	protein phosphatase 1 regulatory subunit 3C [Source:HGNC Symbol;Acc:HGNC:9293]	GO:0005978;GO:0005977;GO:0019903;GO:0005515;GO:0050790;GO:0019888;GO:0006470;GO:0005975;GO:0005829;GO:0004722	K07189-ko04910 Insulin signaling pathway;ko04931 Insulin resistance	KOG3986-Protein phosphatase, regulatory subunit PPP1R3C/D[OT]
ENSG00000197565	24.2561	2.02496	3.58239	5.41e-06	0.00043483	up	COL4A6	collagen type IV alpha 6 chain [Source:HGNC Symbol;Acc:HGNC:2208]	GO:0005581;GO:0005576;GO:0007155;GO:0005578;GO:0005201;GO:0005604;GO:0030574;GO:0030198;GO:0005788;GO:0005587;GO:0071230;GO:0038063;GO:0005198	K06237-ko04151 PI3K-Akt signaling pathway;ko04512 ECM-receptor interaction;ko04510 Focal adhesion;ko04974 Protein digestion and absorption;ko05200 Pathways in cancer;ko05222 Small cell lung cancer;ko04933 AGE-RAGE signaling pathway in diabetic complications;ko05146 Amoebiasis	KOG3544-Collagens (type IV and type XIII), and related proteins[W]
ENSG00000085840	9.47659	2.26031	2.06785	0.00261609	0.0470038	up	ORC1	origin recognition complex subunit 1 [Source:HGNC Symbol;Acc:HGNC:8487]	GO:0005515;GO:0005886;GO:0003677;GO:0005829;GO:0005730;GO:0005634;GO:0005524;GO:0000166;GO:0003682;GO:0006260;GO:0005654;GO:0000784;GO:0000082;GO:0006270;GO:0000808;GO:0005664;GO:0000083	K02603-ko04110 Cell cycle;ko04111 Cell cycle - yeast;ko04113 Meiosis - yeast	KOG1514-Origin recognition complex, subunit 1, and related proteins[L]
ENSG00000184530	0.314864	216.175	-9.42325	0.000128257	0.0050788	down	C6orf58	chromosome 6 open reading frame 58 [Source:HGNC Symbol;Acc:HGNC:20960]	GO:0005576;GO:0007275;GO:0005615;GO:0070062	-	-
ENSG00000186204	6.52781	16.3749	-1.32681	0.00135132	0.0291265	down	CYP4F12	cytochrome P450 family 4 subfamily F member 12 [Source:HGNC Symbol;Acc:HGNC:18857]	GO:0016705;GO:0005506;GO:0055114;GO:0016491;GO:0004497;GO:0046872;GO:0020037;GO:0016021;GO:0016020;GO:0043231;GO:0005789;GO:0031090;GO:0005783;GO:0005737;GO:0070330;GO:0016324;GO:0001676;GO:0019369;GO:0003091;GO:0019825;GO:0000038;GO:0017144;GO:0055078;GO:0008392;GO:0050051;GO:0003095;GO:0019373;GO:0036101;GO:0042360;GO:0018685	-	-
ENSG00000166166	27.228	7.26639	1.90578	0.000324138	0.0103363	up	TRMT61A	tRNA methyltransferase 61A [Source:HGNC Symbol;Acc:HGNC:23790]	GO:0032259;GO:0008033;GO:0016740;GO:0008168;GO:0005634;GO:0016429;GO:0030488;GO:0031515;GO:0006400;GO:0005654	-	KOG2915-tRNA(1-methyladenosine) methyltransferase, subunit GCD14[J]
ENSG00000137070	4.14002	16.2463	-1.9724	0.000148146	0.00570683	down	IL11RA	interleukin 11 receptor subunit alpha [Source:HGNC Symbol;Acc:HGNC:5967]	GO:0007566;GO:0016020;GO:0016021;GO:0004896;GO:0019221;GO:0007165;GO:0005886;GO:0005887;GO:0004871;GO:0004888;GO:0060322;GO:0032502	K05056-ko04630 Jak-STAT signaling pathway;ko04060 Cytokine-cytokine receptor interaction;ko04640 Hematopoietic cell lineage	-
ENSG00000122861	74.7047	17.0443	2.13191	0.000171059	0.00641498	up	PLAU	plasminogen activator, urokinase [Source:HGNC Symbol;Acc:HGNC:9052]	GO:0042730;GO:0042127;GO:0031639;GO:0014909;GO:0001666;GO:0004252;GO:0005576;GO:0006508;GO:0008233;GO:0016787;GO:0008236;GO:0005925;GO:0005886;GO:0005515;GO:0070062;GO:0043312;GO:0035579;GO:0070821;GO:0009986;GO:0006935;GO:0007165;GO:0007596;GO:0007599;GO:0005615;GO:0010469;GO:0014910;GO:0030335;GO:0033628;GO:0061041;GO:2000097	-	-
ENSG00000081985	13.3874	1.32574	3.336	0.000347568	0.0108394	up	IL12RB2	interleukin 12 receptor subunit beta 2 [Source:HGNC Symbol;Acc:HGNC:5972]	GO:0009897;GO:0034097;GO:0032609;GO:0032496;GO:0018108;GO:0019901;GO:0016020;GO:0016021;GO:0004896;GO:0019221;GO:0005886;GO:0005887;GO:0032729;GO:0007166;GO:0008284	K05064-ko04630 Jak-STAT signaling pathway;ko04060 Cytokine-cytokine receptor interaction;ko05321 Inflammatiory bowel disease (IBD)	-
ENSG00000197905	34.5322	7.37919	2.22641	0.00016504	0.00623783	up	TEAD4	TEA domain transcription factor 4 [Source:HGNC Symbol;Acc:HGNC:11717]	GO:0003700;GO:0006355;GO:0006351;GO:0035329;GO:0003677;GO:0005654;GO:0005515;GO:0005634;GO:0045944;GO:0005667;GO:0006367;GO:0001501;GO:0043565;GO:0006357;GO:0007517;GO:0044212;GO:0001085;GO:0048568	-	KOG3841-TEF-1 and related transcription factor, TEAD family[K]
ENSG00000156049	1.11639	6.51657	-2.54528	1.95e-06	0.000203723	down	GNA14	G protein subunit alpha 14 [Source:HGNC Symbol;Acc:HGNC:4382]	GO:0031683;GO:0019001;GO:0001664;GO:0003924;GO:0007165;GO:0004871;GO:0005515;GO:0005525;GO:0007186;GO:0000166;GO:0046872;GO:0005886;GO:0070062;GO:0007188;GO:0030168;GO:0060158;GO:0005834	K04636-ko04020 Calcium signaling pathway;ko05146 Amoebiasis;ko05142 Chagas disease (American trypanosomiasis)	KOG0085-G protein subunit Galphaq/Galphay, small G protein superfamily[T]
ENSG00000106809	2.19653	23.0836	-3.39357	0.000373171	0.0114016	down	OGN	osteoglycin [Source:HGNC Symbol;Acc:HGNC:8126]	GO:0005615;GO:0005576;GO:0005515;GO:0008083;GO:0005578;GO:0070062;GO:0031012;GO:0007409;GO:0043202;GO:0005796;GO:1903561;GO:0018146;GO:0042340;GO:0048662	-	KOG0619-FOG: Leucine rich repeat[R]
ENSG00000185298	31.6851	6.21748	2.3494	3.95e-05	0.00199008	up	CCDC137	coiled-coil domain containing 137 [Source:HGNC Symbol;Acc:HGNC:33451]	GO:0005515;GO:0005694;GO:0001650;GO:0005730;GO:0003723	-	-
ENSG00000167779	511.695	84.0467	2.60602	0.00277947	0.0494005	up	IGFBP6	insulin like growth factor binding protein 6 [Source:HGNC Symbol;Acc:HGNC:5475]	GO:0001558;GO:0005520;GO:0005576;GO:0042568;GO:0005794;GO:0005737;GO:0005615;GO:0031995;GO:0031994;GO:0070062;GO:0044267;GO:0007165;GO:0019838;GO:0008285;GO:0090090;GO:0005102;GO:0043567	-	-
ENSG00000167191	5.51608	17.6854	-1.68084	0.000112623	0.00456485	down	GPRC5B	G protein-coupled receptor class C group 5 member B [Source:HGNC Symbol;Acc:HGNC:13308]	GO:0007165;GO:0004871;GO:0005886;GO:0005829;GO:0005730;GO:0005634;GO:0007186;GO:0004930;GO:0043231;GO:0016021;GO:0016020;GO:0005615;GO:0030659;GO:0031410;GO:0070062;GO:0043123;GO:0032147;GO:0090263;GO:0009986;GO:0001664;GO:0050729;GO:0019901;GO:0060907;GO:0061098;GO:0045666;GO:0030295	-	-
ENSG00000171401	2570.61	14503.2	-2.49619	0.00178941	0.0356048	down	KRT13	keratin 13 [Source:HGNC Symbol;Acc:HGNC:6415]	GO:0005882;GO:0005198;GO:0071300;GO:0043587;GO:0009314;GO:0005515;GO:0005634;GO:0007010;GO:0005829;GO:0070062;GO:0031424;GO:0070268;GO:0045095;GO:0045111	-	-
ENSG00000138744	12.4719	49.4402	-1.98701	0.00066304	0.0173893	down	NAAA	N-acylethanolamine acid amidase [Source:HGNC Symbol;Acc:HGNC:736]	GO:0005764;GO:0006629;GO:0016787;GO:0045202;GO:0098793;GO:0008150;GO:0070062;GO:0008134;GO:0005737;GO:0043202;GO:0007269;GO:0016810	-	-
ENSG00000119917	149.738	11.8234	3.66272	1.33e-06	0.000146954	up	IFIT3	interferon induced protein with tetratricopeptide repeats 3 [Source:HGNC Symbol;Acc:HGNC:5411]	GO:0005515;GO:0005739;GO:0005829;GO:0005737;GO:0002376;GO:0045087;GO:0042802;GO:0051607;GO:0035457;GO:0003674;GO:0009615;GO:0008285;GO:0043066;GO:0060337	-	KOG1124-FOG: TPR repeat[R]
ENSG00000151632	456.678	63.1858	2.8535	0.00133087	0.0288691	up	AKR1C2	aldo-keto reductase family 1 member C2 [Source:HGNC Symbol;Acc:HGNC:385]	GO:0006629;GO:0055114;GO:0016491;GO:0005737;GO:0007186;GO:0008202;GO:0008284;GO:0030855;GO:0006693;GO:0051897;GO:0044597;GO:0044598;GO:0016655;GO:0007586;GO:0042448;GO:0032052;GO:0004032;GO:0071395;GO:0018636;GO:0047086;GO:0047115;GO:0071799;GO:0031406	K00089-ko00140 Steroid hormone biosynthesis	KOG1577-Aldo/keto reductase family proteins[R]
ENSG00000168502	30.4502	3.78547	3.00791	0.000368122	0.011276	up	MTCL1	microtubule crosslinking factor 1 [Source:HGNC Symbol;Acc:HGNC:29121]	GO:0005886;GO:0010506;GO:0042803;GO:0005615;GO:0016020;GO:0005737;GO:0003723;GO:0005856;GO:0008017;GO:0000922;GO:0030496;GO:0090314;GO:0016328;GO:0016324;GO:0016327;GO:0001578;GO:0045197;GO:0097427;GO:2000576	-	KOG4787-Uncharacterized conserved protein [S]
ENSG00000197766	34.9451	208.06	-2.57384	7.44e-05	0.00326846	down	CFD	complement factor D [Source:HGNC Symbol;Acc:HGNC:2771]	GO:0004252;GO:0005576;GO:0006508;GO:0008233;GO:0016787;GO:0008236;GO:0002376;GO:0045087;GO:0070062;GO:0043312;GO:0002576;GO:0034774;GO:1904813;GO:0031093;GO:0006956;GO:0006957;GO:0005615	K01334-ko04610 Complement and coagulation cascades;ko05150 Staphylococcus aureus infection	KOG3627-Trypsin[E]
ENSG00000183814	8.74083	2.34718	1.89684	0.00281759	0.0497699	up	LIN9	lin-9 DREAM MuvB core complex component [Source:HGNC Symbol;Acc:HGNC:30830]	GO:0017053;GO:0006351;GO:0005654;GO:0007049;GO:0005515;GO:0005634;GO:0071897;GO:0051726	-	-
ENSG00000069702	4.1048	8.98828	-1.13073	0.000927559	0.0221108	down	TGFBR3	transforming growth factor beta receptor 3 [Source:HGNC Symbol;Acc:HGNC:11774]	GO:0005576;GO:0005515;GO:0005886;GO:0016021;GO:0016020;GO:0005615;GO:0070062;GO:0009986;GO:0009897;GO:0030509;GO:0034695;GO:0060021;GO:0003151;GO:0015026;GO:0043235;GO:0055010;GO:0060389;GO:0060412;GO:0046332;GO:0003007;GO:0016477;GO:0030165;GO:0006955;GO:0001837;GO:0008201;GO:0005887;GO:0035556;GO:0001889;GO:0007179;GO:0060045;GO:0060347;GO:0005114;GO:0050680;GO:0016049;GO:0034673;GO:0050431;GO:…	-	-
ENSG00000131018	4.35275	10.9088	-1.32549	0.000103064	0.00424893	down	SYNE1	spectrin repeat containing nuclear envelope protein 1 [Source:HGNC Symbol;Acc:HGNC:17089]	GO:0034993;GO:0005515;GO:0042803;GO:0003779;GO:0005794;GO:0051015;GO:0031965;GO:0005654;GO:0016021;GO:0016020;GO:0005737;GO:0005634;GO:0003723;GO:0045211;GO:0030154;GO:0005856;GO:0007283;GO:0090286;GO:0005635;GO:0019899;GO:0005730;GO:0007030;GO:0030017;GO:0006997;GO:0005521;GO:0090292;GO:0042692;GO:0005640;GO:0000932	-	KOG0516-Dystonin, GAS (Growth-arrest-specific protein), and related proteins[Z]
ENSG00000115648	2.52921	36.5433	-3.85285	2.83e-05	0.00153698	down	MLPH	melanophilin [Source:HGNC Symbol;Acc:HGNC:29643]	GO:0005622;GO:0006886;GO:0017137;GO:0005515;GO:0046872;GO:0005737;GO:0048471;GO:0030425;GO:0070062	-	-
ENSG00000168301	3.85848	11.3235	-1.55322	0.00096711	0.0228677	down	KCTD6	potassium channel tetramerization domain containing 6 [Source:HGNC Symbol;Acc:HGNC:22235]	GO:0005515;GO:0051260;GO:0042802;GO:0005829;GO:0043687;GO:0030506	-	KOG2723-Uncharacterized conserved protein, contains BTB/POZ domain[R]
ENSG00000168306	1.62776	6.72824	-2.04734	0.000310955	0.00998207	down	ACOX2	acyl-CoA oxidase 2 [Source:HGNC Symbol;Acc:HGNC:120]	GO:0008152;GO:0005739;GO:0016627;GO:0055114;GO:0050660;GO:0043231;GO:0003995;GO:0006631;GO:0005777;GO:0003997;GO:0006635;GO:0042803;GO:0006629;GO:0016491;GO:0005102;GO:0033540;GO:0005782;GO:0006699;GO:0016402;GO:0010942;GO:0033791;GO:1902884	K10214-ko00120 Primary bile acid biosynthesis;ko04146 Peroxisome;ko03320 PPAR signaling pathway	KOG0136-Acyl-CoA oxidase[I]
ENSG00000168309	3.22712	23.9449	-2.8914	2.27e-06	0.000226336	down	FAM107A	family with sequence similarity 107 member A [Source:HGNC Symbol;Acc:HGNC:30827]	GO:0016607;GO:0005634;GO:0003674;GO:0040008;GO:0001558;GO:0043005	-	-
ENSG00000165272	215.523	1213.33	-2.49305	2.43e-07	3.52e-05	down	AQP3	aquaporin 3 (Gill blood group) [Source:HGNC Symbol;Acc:HGNC:636]	GO:0016323;GO:0005911;GO:0005886;GO:0090650;GO:0070295;GO:0015840;GO:0015793;GO:0006833;GO:0005634;GO:0016020;GO:0005215;GO:0006810;GO:0016021;GO:0005737;GO:0015250;GO:0015254;GO:0007588;GO:0032526;GO:0033280;GO:0003091;GO:0071456;GO:0051592;GO:0042476;GO:0002684;GO:0045616	K09876-ko04962 Vasopressin-regulated water reabsorption	KOG0224-Aquaporin (major intrinsic protein family)[G]
ENSG00000106351	7.13336	26.8514	-1.91234	3.27e-05	0.00172102	down	AGFG2	ArfGAP with FG repeats 2 [Source:HGNC Symbol;Acc:HGNC:5177]	GO:0005096;GO:0043547;GO:0046872;GO:0016020;GO:0003674;GO:0008150	-	KOG0702-Predicted GTPase-activating protein[T]
ENSG00000011465	56.3646	147.838	-1.39116	0.000602435	0.016224	down	DCN	decorin [Source:HGNC Symbol;Acc:HGNC:2705]	GO:0005615;GO:0005589;GO:0005578;GO:0042060;GO:0032496;GO:0019800;GO:0009612;GO:0007568;GO:0007519;GO:0001890;GO:0001822;GO:0050840;GO:0047485;GO:0005539;GO:0005518;GO:0005576;GO:0005515;GO:0003723;GO:0005737;GO:0004860;GO:0006469;GO:0019221;GO:0046426;GO:0031012;GO:0045944;GO:0043202;GO:0030198;GO:0030203;GO:0005796;GO:0030206;GO:0030207;GO:0030208;GO:0009887;GO:0022617;GO:0016239;GO:0010508;GO:…	K04660-ko04350 TGF-beta signaling pathway;ko05205 Proteoglycans in cancer	KOG0619-FOG: Leucine rich repeat[R]
ENSG00000147324	35.72	9.71335	1.87869	0.000999685	0.0233447	up	MFHAS1	malignant fibrous histiocytoma amplified sequence 1 [Source:HGNC Symbol;Acc:HGNC:16982]	GO:0005515;GO:0005622;GO:0007264;GO:0005525;GO:0007165	-	KOG0619-FOG: Leucine rich repeat[R]
ENSG00000150594	2.26714	11.3443	-2.32303	0.00040443	0.0120957	down	ADRA2A	adrenoceptor alpha 2A [Source:HGNC Symbol;Acc:HGNC:281]	GO:0007165;GO:0004871;GO:0005886;GO:0007186;GO:0004930;GO:0016021;GO:0016020;GO:0030168;GO:0019229;GO:0006940;GO:0005737;GO:0004935;GO:0004938;GO:0005515;GO:0042803;GO:0046982;GO:0030335;GO:0007266;GO:0046676;GO:0006928;GO:0050796;GO:1901020;GO:0032870;GO:0019901;GO:0043235;GO:0043406;GO:0007265;GO:0030036;GO:0001819;GO:0032147;GO:0032148;GO:0051044;GO:0008284;GO:0005887;GO:0050995;GO:0042593;GO:…	-	-
ENSG00000204936	298.821	1.91884	7.2829	0.000121066	0.00484989	up	CD177	CD177 molecule [Source:HGNC Symbol;Acc:HGNC:30072]	GO:0005515;GO:0005886;GO:0016020;GO:0031225;GO:0050900;GO:0070062;GO:0043312;GO:0035579;GO:0070821;GO:0007596	-	-
ENSG00000097046	11.7533	3.54489	1.72925	0.00137924	0.0295433	up	CDC7	cell division cycle 7 [Source:HGNC Symbol;Acc:HGNC:1745]	GO:0005515;GO:0045171;GO:0051301;GO:0016310;GO:0016301;GO:0016740;GO:0005654;GO:0006468;GO:0005524;GO:0004674;GO:0000166;GO:0004672;GO:0046872;GO:0005634;GO:0007049;GO:0008360;GO:0072686;GO:0018105;GO:0000082;GO:0000727;GO:0006260;GO:0006270;GO:0006909;GO:0008284;GO:0010571;GO:0010971;GO:0044770;GO:0005737	K02214-ko04110 Cell cycle;ko04111 Cell cycle - yeast;ko04113 Meiosis - yeast	KOG1167-Serine/threonine protein kinase of the CDC7 subfamily involved in DNA synthesis, repair and recombination[L]
ENSG00000137077	17.4216	413.618	-4.56935	3.42e-11	1.75e-08	down	CCL21	C-C motif chemokine ligand 21 [Source:HGNC Symbol;Acc:HGNC:10620]	GO:0006955;GO:0005576;GO:0005623;GO:0007186;GO:0005125;GO:0005615;GO:0006954;GO:0008009;GO:0006935;GO:0060326;GO:0048020;GO:0002548;GO:0048247;GO:0070098;GO:0071346;GO:0071347;GO:0071356;GO:0005578;GO:0051897;GO:0007267;GO:0030838;GO:0051491;GO:0042379;GO:0046330;GO:0031732;GO:0001768;GO:0001771;GO:0001954;GO:0002407;GO:0002606;GO:0010560;GO:0031274;GO:0031295;GO:0031529;GO:0033630;GO:0034695;GO:…	K16062-ko04064 NF-kappa B signaling pathway;ko04060 Cytokine-cytokine receptor interaction;ko04062 Chemokine signaling pathway	-
ENSG00000130487	22.5171	1.507	3.90127	0.000247465	0.00839149	up	KLHDC7B	kelch domain containing 7B [Source:HGNC Symbol;Acc:HGNC:25145]	GO:0016567;GO:0004842;GO:0031463	-	KOG1072-FOG: Kelch repeat[R]
ENSG00000121440	2.8685	7.74328	-1.43265	0.000645408	0.0170843	down	PDZRN3	PDZ domain containing ring finger 3 [Source:HGNC Symbol;Acc:HGNC:17704]	GO:0005829;GO:0005634;GO:0031594;GO:0016567;GO:0007528;GO:0061630;GO:0004842;GO:0016740;GO:0005654;GO:0046872;GO:0008270	-	KOG0297-TNF receptor-associated factor[T]
ENSG00000189058	14.2004	121.304	-3.09463	1.82e-05	0.00108171	down	APOD	apolipoprotein D [Source:HGNC Symbol;Acc:HGNC:612]	GO:0005622;GO:0060588;GO:0000302;GO:0005576;GO:0008289;GO:0005515;GO:0006629;GO:0005783;GO:0005215;GO:0006810;GO:0048471;GO:0005615;GO:0036094;GO:0030425;GO:0006869;GO:0070062;GO:0006006;GO:0007420;GO:0001525;GO:0051895;GO:0010642;GO:0015485;GO:1900016;GO:0043025;GO:0042493;GO:0048662;GO:0048678;GO:0007568;GO:0005319;GO:0014012;GO:0042246;GO:0042308;GO:0071638;GO:2000098;GO:2000405;GO:0022626	-	KOG4824-Apolipoprotein D/Lipocalin[M]
ENSG00000266145	0.653952	22.8862	-5.12915	3.22e-06	0.000298166	down	AP001004.1	-	-	-	-
ENSG00000169429	193.975	4.13255	5.5527	9.35e-13	6.62e-10	up	CXCL8	C-X-C motif chemokine ligand 8 [Source:HGNC Symbol;Acc:HGNC:6025]	GO:0006955;GO:0005576;GO:0005515;GO:0005622;GO:0006935;GO:0005125;GO:0005615;GO:0006954;GO:0008009;GO:0006952;GO:0005153;GO:0030593;GO:0042119;GO:0070098;GO:0007050;GO:0071347;GO:0071356;GO:0007186;GO:0007165;GO:0071222;GO:0006928;GO:0034976;GO:0001525;GO:0030155;GO:0035556;GO:0090023;GO:0008285;GO:0044344;GO:0019722;GO:0050930;GO:0045744;GO:0031623;GO:0048566;GO:0045766;GO:0036499;GO:0002237;GO:…	K10030-ko04064 NF-kappa B signaling pathway;ko04072 Phospholipase D signaling pathway;ko04060 Cytokine-cytokine receptor interaction;ko04620 Toll-like receptor signaling pathway;ko04621 NOD-like receptor signaling pathway;ko04622 RIG-I-like receptor signaling pathway;ko04062 Chemokine signaling pathway;ko05200 Pathways in cancer;ko05202 Transcriptional misregulation in cancers;ko05219 Bladder can…	-
ENSG00000187908	4.04134	397.352	-6.61944	0.000381512	0.0115829	down	DMBT1	deleted in malignant brain tumors 1 [Source:HGNC Symbol;Acc:HGNC:2926]	GO:0005576;GO:0005515;GO:0016020;GO:0015031;GO:0005737;GO:0006810;GO:0005044;GO:0006898;GO:0007275;GO:0005615;GO:0030154;GO:0045087;GO:0051607;GO:0070062;GO:0030670;GO:0044267;GO:0002221;GO:0048306;GO:0050830;GO:0016032;GO:0030855;GO:0008329;GO:0050829;GO:0019898;GO:0042589;GO:0035375;GO:0043152	K13912-ko04970 Salivary secretion	-
ENSG00000106258	8.18243	45.3099	-2.46922	6.41e-05	0.00294338	down	CYP3A5	cytochrome P450 family 3 subfamily A member 5 [Source:HGNC Symbol;Acc:HGNC:2638]	GO:0016705;GO:0005506;GO:0043231;GO:0005789;GO:0031090;GO:0005783;GO:0055114;GO:0016491;GO:0004497;GO:0046872;GO:0016020;GO:0020037;GO:0016712;GO:0070330;GO:0006805;GO:0019825;GO:0008202;GO:0101020;GO:0002933;GO:0042737;GO:0070989;GO:0009822;GO:0016021	K17690-ko00140 Steroid hormone biosynthesis;ko00830 Retinol metabolism;ko00980 Metabolism of xenobiotics by cytochrome P450;ko00982 Drug metabolism - cytochrome P450;ko05204 Chemical carcinogenesis	KOG0158-Cytochrome P450 CYP3/CYP5/CYP6/CYP9 subfamilies[Q]
ENSG00000187243	13.0201	2.35387	2.46763	6.83e-05	0.0030632	up	MAGED4B	MAGE family member D4B [Source:HGNC Symbol;Acc:HGNC:22880]	-	-	KOG4562-Uncharacterized conserved protein (tumor-rejection antigen MAGE in humans)[S]
ENSG00000211942	25.2979	2.61406	3.27466	0.00246891	0.0450314	up	IGHV3-13	immunoglobulin heavy variable 3-13 [Source:HGNC Symbol;Acc:HGNC:5581]	GO:0006955;GO:0006508;GO:0005576;GO:0005886;GO:0016020;GO:0005615;GO:0002376;GO:0003823;GO:0002250;GO:0004252;GO:0006898;GO:0006956;GO:0006958;GO:0038095;GO:0038096;GO:0050776;GO:0050900;GO:0070062;GO:0072562;GO:0030449	-	-
ENSG00000198729	37.5009	5.39779	2.79649	2.28e-08	4.61e-06	up	PPP1R14C	protein phosphatase 1 regulatory inhibitor subunit 14C [Source:HGNC Symbol;Acc:HGNC:14952]	GO:0016020;GO:0004865;GO:0043086;GO:0005737;GO:0004864;GO:0042325	-	-
ENSG00000278966	11.3585	0.824356	3.78437	0.000332231	0.0105247	up	AL031602.1	-	-	-	-
ENSG00000178445	27.3174	1.21597	4.48964	7.51e-06	0.00055637	up	GLDC	glycine decarboxylase [Source:HGNC Symbol;Acc:HGNC:4313]	GO:0005960;GO:0005739;GO:1903442;GO:0036255;GO:0019464;GO:0006546;GO:0070280;GO:0046983;GO:0030170;GO:0019899;GO:0016594;GO:0004375;GO:0042803;GO:0005886;GO:0003824;GO:0055114;GO:0016491;GO:0005634;GO:0006544;GO:0006520;GO:0016829;GO:0005759;GO:0009055	K00281-ko01200 Carbon metabolism;ko00630 Glyoxylate and dicarboxylate metabolism;ko00260 Glycine, serine and threonine metabolism	KOG2040-Glycine dehydrogenase (decarboxylating)[E]
ENSG00000157193	10.8771	1.96136	2.47137	0.000415153	0.0123246	up	LRP8	LDL receptor related protein 8 [Source:HGNC Symbol;Acc:HGNC:6700]	GO:0043025;GO:0030425;GO:0030424;GO:0016020;GO:0014069;GO:0005875;GO:0071397;GO:0071363;GO:0042493;GO:0021987;GO:0019894;GO:0008035;GO:0005576;GO:0006508;GO:0005515;GO:0005886;GO:0006629;GO:0005509;GO:0016021;GO:0006898;GO:0006897;GO:0050731;GO:0007165;GO:0000122;GO:0001523;GO:0004888;GO:0019221;GO:0043235;GO:0005901;GO:1900006;GO:0034185;GO:0030229;GO:0061098;GO:0032793;GO:0038026;GO:0050804;GO:…	-	-
ENSG00000204335	0.484356	5.35838	-3.46766	6.69e-06	0.000518021	down	SP5	Sp5 transcription factor [Source:HGNC Symbol;Acc:HGNC:14529]	GO:0071407;GO:0060349;GO:0036342;GO:0043565;GO:0000977;GO:0006355;GO:0006351;GO:0003677;GO:0046872;GO:0005634;GO:0003676;GO:0000981;GO:0006357	-	KOG1721-FOG: Zn-finger[R]
ENSG00000206172	14.3331	97.5302	-2.7665	0.000893835	0.0215923	down	HBA1	hemoglobin subunit alpha 1 [Source:HGNC Symbol;Acc:HGNC:4823]	GO:0005515;GO:0005506;GO:0046872;GO:0016020;GO:0006810;GO:0022627;GO:0020037;GO:0098869;GO:0006898;GO:0005576;GO:0019825;GO:0005829;GO:0005344;GO:0015671;GO:0005833;GO:0070062;GO:0072562;GO:0015701;GO:0010942;GO:0042542;GO:0031838;GO:0071682;GO:0004601;GO:0042744;GO:0031720;GO:0051291	K13822-ko05144 Malaria;ko05143 African trypanosomiasis	KOG3378-Globins and related hemoproteins[C]
ENSG00000196872	3.90274	16.1642	-2.05024	1.86e-06	0.000197385	down	KIAA1211L	KIAA1211 like [Source:HGNC Symbol;Acc:HGNC:33454]	-	-	-
ENSG00000196878	247.947	61.5329	2.0106	4.35e-05	0.00216089	up	LAMB3	laminin subunit beta 3 [Source:HGNC Symbol;Acc:HGNC:6490]	GO:0005576;GO:0007155;GO:0005578;GO:0005604;GO:0005515;GO:0030198;GO:0005198;GO:0022617;GO:0008544;GO:0031581;GO:0035987;GO:0005610;GO:0050873;GO:0032403	K06244-ko04151 PI3K-Akt signaling pathway;ko04512 ECM-receptor interaction;ko04510 Focal adhesion;ko05200 Pathways in cancer;ko05222 Small cell lung cancer;ko05146 Amoebiasis;ko05145 Toxoplasmosis	KOG0994-Extracellular matrix glycoprotein Laminin subunit beta[W]
ENSG00000023608	17.3144	5.0827	1.76831	0.00126265	0.0278384	up	SNAPC1	small nuclear RNA activating complex polypeptide 1 [Source:HGNC Symbol;Acc:HGNC:11134]	GO:0006355;GO:0006351;GO:0003677;GO:0005654;GO:0005634;GO:0043565;GO:0042795;GO:0042796;GO:0019185	-	KOG4746-Small nuclear RNA activating complex (SNAPc), subunit SNAP43[A]
ENSG00000168389	23.1733	5.8693	1.9812	0.000925362	0.0220803	up	MFSD2A	major facilitator superfamily domain containing 2A [Source:HGNC Symbol;Acc:HGNC:25897]	GO:0005886;GO:0055085;GO:0015293;GO:0005789;GO:0005783;GO:0016021;GO:0016020;GO:0006810;GO:0006869;GO:0005887;GO:0015908;GO:0006656;GO:0005548;GO:0021766;GO:0015245;GO:0051978;GO:0045056;GO:0051977;GO:0060856;GO:1990379	-	KOG4830-Predicted sugar transporter[G]
ENSG00000244383	0.32864	6.35785	-4.27396	7.44e-06	0.00055637	down	FAM3D-AS1	FAM3D antisense RNA 1 [Source:HGNC Symbol;Acc:HGNC:41276]	-	-	-
ENSG00000182481	128.882	32.1472	2.00329	0.000570405	0.015588	up	KPNA2	karyopherin subunit alpha 2 [Source:HGNC Symbol;Acc:HGNC:6395]	GO:0005515;GO:0005654;GO:0005829;GO:0015031;GO:0008565;GO:0016020;GO:0005737;GO:0005634;GO:0006810;GO:0003723;GO:0006606;GO:0075733;GO:0019054;GO:0005643;GO:0016032;GO:0006259;GO:0006607;GO:0042826;GO:0000018;GO:0008139	K15043-ko05164 Influenza A	KOG0166-Karyopherin (importin) alpha[U]
ENSG00000002726	1.47225	10.0031	-2.76435	0.000419121	0.0124271	down	AOC1	amine oxidase, copper containing 1 [Source:HGNC Symbol;Acc:HGNC:80]	GO:0055114;GO:0016491;GO:0046872;GO:0005507;GO:0008131;GO:0048038;GO:0009308;GO:0005576;GO:0005886;GO:0042803;GO:0008270;GO:0005615;GO:0005509;GO:0005777;GO:0005923;GO:0008201;GO:0070062;GO:0004872;GO:0006805;GO:0043312;GO:0035580;GO:0008144;GO:0032403;GO:0046677;GO:0042493;GO:0071504;GO:0071280;GO:0071420;GO:0052597;GO:0052598;GO:0052599;GO:0052600;GO:0035874;GO:0097185	K11182-ko00330 Arginine and proline metabolism;ko00340 Histidine metabolism;ko00380 Tryptophan metabolism	KOG1186-Copper amine oxidase[Q]
ENSG00000129437	8.86653	0.72392	3.61447	0.000916573	0.0219358	up	KLK14	kallikrein related peptidase 14 [Source:HGNC Symbol;Acc:HGNC:6362]	GO:0004252;GO:0005576;GO:0006508;GO:0008233;GO:0016787;GO:0005615;GO:0008236;GO:0070062;GO:0070268;GO:0045744;GO:0045745;GO:0048730;GO:0009566;GO:0070684	-	KOG3627-Trypsin[E]
ENSG00000188508	666.331	5.71854	6.86445	3.56e-17	6.6e-14	up	KRTDAP	keratinocyte differentiation associated protein [Source:HGNC Symbol;Acc:HGNC:16313]	GO:0005576;GO:0030154	-	-
ENSG00000188505	28.7794	289.506	-3.33049	0.000514088	0.0145785	down	NCCRP1	non-specific cytotoxic cell receptor protein 1 homolog (zebrafish) [Source:HGNC Symbol;Acc:HGNC:33739]	GO:0005737;GO:0070062;GO:0008284	-	-
ENSG00000078596	6.6212	22.7421	-1.7802	9.63e-06	0.000668103	down	ITM2A	integral membrane protein 2A [Source:HGNC Symbol;Acc:HGNC:6173]	GO:0002377;GO:0002317;GO:0005515;GO:0016021;GO:0016020	-	KOG4681-Uncharacterized conserved protein[S]
ENSG00000213928	133.555	43.8552	1.60662	0.000720676	0.0182642	up	IRF9	interferon regulatory factor 9 [Source:HGNC Symbol;Acc:HGNC:6131]	GO:0005515;GO:0006355;GO:0006351;GO:0003700;GO:0003677;GO:0005829;GO:0005737;GO:0005634;GO:0000975;GO:0051607;GO:0001047;GO:0005654;GO:0007166;GO:0006366;GO:0060333;GO:0060337	K04693-ko04630 Jak-STAT signaling pathway;ko04380 Osteoclast differentiation;ko05203 Viral carcinogenesis;ko05162 Measles;ko05164 Influenza A;ko05160 Hepatitis C;ko05168 Herpes simplex infection	-
ENSG00000104894	9.85982	32.8961	-1.73828	0.00278232	0.0494005	down	CD37	CD37 molecule [Source:HGNC Symbol;Acc:HGNC:1666]	GO:0016021;GO:0016020;GO:0005515;GO:0005887;GO:0070062;GO:0007166;GO:0001772	K06475-ko04640 Hematopoietic cell lineage	KOG3882-Tetraspanin family integral membrane protein[R]
ENSG00000103044	150.221	11.9746	3.64904	9.06e-10	3.03e-07	up	HAS3	hyaluronan synthase 3 [Source:HGNC Symbol;Acc:HGNC:4820]	GO:0016757;GO:0016740;GO:0016021;GO:0016020;GO:0045893;GO:0005886;GO:0007155;GO:0005887;GO:0050501;GO:0030213;GO:0005975;GO:0045226;GO:0085029;GO:1900106;GO:0036117;GO:0005737	-	KOG2571-Chitin synthase/hyaluronan synthase (glycosyltransferases)[M]
ENSG00000204616	0.47563	8.71376	-4.19538	0.000305275	0.00985228	down	TRIM31	tripartite motif containing 31 [Source:HGNC Symbol;Acc:HGNC:16289]	GO:0046597;GO:0045087;GO:0005515;GO:0005739;GO:0005622;GO:0016567;GO:0016740;GO:0046872;GO:0008270;GO:0005737;GO:0005829;GO:0051091;GO:0060333;GO:0032897;GO:1902186	-	KOG2177-Predicted E3 ubiquitin ligase[O]
ENSG00000204618	6.88094	23.2443	-1.7562	0.000189228	0.00685092	down	RNF39	ring finger protein 39 [Source:HGNC Symbol;Acc:HGNC:18064]	GO:0046872;GO:0008270;GO:0005737;GO:0008150;GO:0005575	-	KOG2177-Predicted E3 ubiquitin ligase[O]
ENSG00000154545	12.7323	2.5932	2.29569	0.000256477	0.00857631	up	MAGED4	MAGE family member D4 [Source:HGNC Symbol;Acc:HGNC:23793]	-	-	KOG4562-Uncharacterized conserved protein (tumor-rejection antigen MAGE in humans)[S]
ENSG00000137965	215.018	15.4678	3.79712	9.26e-06	0.000653745	up	IFI44	interferon induced protein 44 [Source:HGNC Symbol;Acc:HGNC:16938]	GO:0005737;GO:0009615	-	-
ENSG00000134873	0.641416	205.467	-8.32343	4.16e-06	0.000357686	down	CLDN10	claudin 10 [Source:HGNC Symbol;Acc:HGNC:2033]	GO:0005886;GO:0006811;GO:0005198;GO:0016021;GO:0016020;GO:0006810;GO:0030054;GO:0005923;GO:0042802;GO:0007155;GO:0016338;GO:0005737	K06087-ko04514 Cell adhesion molecules (CAMs);ko04530 Tight junction;ko04670 Leukocyte transendothelial migration;ko05160 Hepatitis C	-
ENSG00000082397	8.13164	21.1121	-1.37645	0.00170251	0.0342151	down	EPB41L3	erythrocyte membrane protein band 4.1 like 3 [Source:HGNC Symbol;Acc:HGNC:3380]	GO:0044224;GO:0033270;GO:0030673;GO:0014069;GO:0072659;GO:0071205;GO:0048812;GO:0043217;GO:0030913;GO:0008360;GO:0002175;GO:0001558;GO:0019898;GO:0008092;GO:0005856;GO:0005911;GO:0005886;GO:0005198;GO:0003779;GO:0016020;GO:0005737;GO:0006915;GO:0030054;GO:0007010;GO:0007016;GO:0030866;GO:0005515;GO:0008150;GO:0005829;GO:0031032;GO:0005200;GO:0030865;GO:0016021	K06107-ko04530 Tight junction	KOG3527-Erythrocyte membrane protein 4.1 and related proteins of the ERM family[R]
ENSG00000151892	0.182382	5.15946	-4.82219	6e-22	2.06e-18	down	GFRA1	GDNF family receptor alpha 1 [Source:HGNC Symbol;Acc:HGNC:4243]	GO:0043547;GO:0005886;GO:0005622;GO:0016020;GO:0031225;GO:0004872;GO:0070062;GO:0000165;GO:0005102;GO:0007411;GO:0005088;GO:0016167;GO:0035860;GO:0019898;GO:0007166;GO:0007399	-	-
ENSG00000230657	0.0001	11.7555	-16.843	8.4e-11	3.81e-08	down	PRB4	proline rich protein BstNI subfamily 4 [Source:HGNC Symbol;Acc:HGNC:9340]	-	-	-
ENSG00000073756	18.8684	2.227	3.0828	0.000346001	0.0108046	up	PTGS2	prostaglandin-endoperoxide synthase 2 [Source:HGNC Symbol;Acc:HGNC:9605]	GO:0055114;GO:0006954;GO:0020037;GO:0008217;GO:0098869;GO:0006979;GO:0004601;GO:0004666;GO:0001516;GO:0019371;GO:0043234;GO:0043005;GO:0005901;GO:0005737;GO:1902219;GO:0090362;GO:0090336;GO:0090271;GO:0090050;GO:0071636;GO:0071498;GO:0071471;GO:0071318;GO:0071260;GO:0070542;GO:0051968;GO:0051926;GO:0051384;GO:0050873;GO:0048661;GO:0046697;GO:0045987;GO:0045986;GO:0045907;GO:0045786;GO:0045429;GO:…	K11987-ko00590 Arachidonic acid metabolism;ko04370 VEGF signaling pathway;ko04064 NF-kappa B signaling pathway;ko04668 TNF signaling pathway;ko04923 Regulation of lipolysis in adipocyte;ko04913 Ovarian Steroidogenesis;ko04921 Oxytocin signaling pathway;ko04726 Serotonergic synapse;ko04723 Retrograde endocannabinoid signaling;ko05200 Pathways in cancer;ko05206 MicroRNAs in cancer;ko05204 Chemical …	KOG2408-Peroxidase/oxygenase[R]
ENSG00000111961	9.03591	35.8926	-1.98994	0.000131317	0.00516598	down	SASH1	SAM and SH3 domain containing 1 [Source:HGNC Symbol;Acc:HGNC:19182]	GO:0043234;GO:0019901;GO:0008022;GO:0031435;GO:0032947;GO:0000209;GO:0010595;GO:0031666;GO:0043507;GO:0045766;GO:1900044;GO:1900745;GO:1901224;GO:1902498	-	-
ENSG00000168779	9.66093	0.563561	4.09952	5.8e-10	2.15e-07	up	SHOX2	short stature homeobox 2 [Source:HGNC Symbol;Acc:HGNC:10854]	GO:0043565;GO:0003677;GO:0006355;GO:0005634;GO:0007275;GO:0007399;GO:0001501;GO:0007507;GO:2000172;GO:0060415;GO:0060351;GO:0060272;GO:0050772;GO:0048743;GO:0048598;GO:0048557;GO:0045944;GO:0045880;GO:0035115;GO:0032330;GO:0030326;GO:0003209;GO:0003170;GO:0002063;GO:0002062;GO:0002053;GO:0001649;GO:0000122	-	KOG0490-Transcription factor, contains HOX domain[R]
ENSG00000250742	1.31388	6.87211	-2.38692	2.14e-05	0.00121561	down	LINC02381	long intergenic non-protein coding RNA 2381 [Source:HGNC Symbol;Acc:HGNC:53304]	-	-	-
ENSG00000153823	2.72955	9.58044	-1.81143	0.000265746	0.00883716	down	PID1	phosphotyrosine interaction domain containing 1 [Source:HGNC Symbol;Acc:HGNC:26084]	GO:0005515;GO:0005737;GO:0045944;GO:0071345;GO:0001933;GO:0010628;GO:2000379;GO:0046627;GO:0071356;GO:0090005;GO:0071354;GO:2000045;GO:2000377;GO:0006112;GO:0010635;GO:0051881;GO:0070346;GO:0070584;GO:0071398;GO:0090298;GO:2001170;GO:2001171;GO:2001274;GO:0046325;GO:0044320	-	KOG4448-Uncharacterized conserved protein, contains phosphotyrosine interaction (PI) domain[S]
ENSG00000164330	2.1159	10.1155	-2.25723	1.1e-06	0.000127006	down	EBF1	early B-cell factor 1 [Source:HGNC Symbol;Acc:HGNC:3126]	GO:0070742;GO:0005515;GO:0006355;GO:0006351;GO:0003677;GO:0046872;GO:0005634;GO:0007275	-	KOG3836-HLH transcription factor EBF/Olf-1 and related DNA binding proteins[K]
ENSG00000100410	86.321	27.247	1.66362	0.0016246	0.0330354	up	PHF5A	PHD finger protein 5A [Source:HGNC Symbol;Acc:HGNC:18000]	GO:0016607;GO:0016363;GO:0045893;GO:0003700;GO:0005681;GO:0006355;GO:0006351;GO:0003677;GO:0005634;GO:0008380;GO:0006397;GO:0003723;GO:0005654;GO:0000398;GO:0071011;GO:0071013;GO:0005689;GO:0005686	K12834-ko03040 Spliceosome	KOG1705-Uncharacterized conserved protein, contains CXXC motifs[S]
ENSG00000123473	8.95977	2.41649	1.89055	0.000159817	0.0060882	up	STIL	SCL/TAL1 interrupting locus [Source:HGNC Symbol;Acc:HGNC:10879]	GO:0005515;GO:0005829;GO:0005737;GO:0007275;GO:0005856;GO:0005813;GO:0005814;GO:0043066;GO:0008283;GO:0001947;GO:0007368;GO:0000578;GO:0021915;GO:0001843;GO:0007052;GO:0030903;GO:0033504;GO:0046599;GO:0007224;GO:0001701;GO:0030900;GO:0035264;GO:0051298;GO:0071539	-	-
ENSG00000213096	1.72408	5.24398	-1.60484	0.000101542	0.00420055	down	ZNF254	zinc finger protein 254 [Source:HGNC Symbol;Acc:HGNC:13047]	GO:0005622;GO:0006355;GO:0003676;GO:0006351;GO:0003677;GO:0046872;GO:0005634;GO:0003700;GO:0000122	-	KOG1721-FOG: Zn-finger[R]
ENSG00000170477	160.466	12007.5	-6.22552	7.79e-10	2.68e-07	down	KRT4	keratin 4 [Source:HGNC Symbol;Acc:HGNC:6441]	GO:0050680;GO:0030855;GO:0005882;GO:0005515;GO:0005198;GO:0005634;GO:0045095;GO:0007010;GO:0005829;GO:0031424;GO:0009986;GO:0070268;GO:0045111	-	-
ENSG00000068831	3.24795	15.281	-2.23414	0.000160177	0.00609229	down	RASGRP2	RAS guanyl releasing protein 2 [Source:HGNC Symbol;Acc:HGNC:9879]	GO:0007165;GO:0005886;GO:0005829;GO:0005509;GO:0035556;GO:0046872;GO:0007264;GO:0016020;GO:0005737;GO:0030054;GO:0045202;GO:0005085;GO:0042995;GO:0008289;GO:0043547;GO:0007265;GO:0001558;GO:0043005;GO:0071277;GO:0032587;GO:0019992;GO:0005622	K12361-ko04014 Ras signaling pathway;ko04015 Rap1 signaling pathway;ko04010 MAPK signaling pathway;ko04611 Platelet activation;ko04062 Chemokine signaling pathway;ko05200 Pathways in cancer	KOG3417-Ras1 guanine nucleotide exchange factor[T]
ENSG00000175643	23.268	4.78558	2.28158	1.63e-05	0.0010011	up	RMI2	RecQ mediated genome instability 2 [Source:HGNC Symbol;Acc:HGNC:28349]	GO:0003677;GO:0005829;GO:0016607;GO:0005634;GO:0006260;GO:0005654;GO:1901796;GO:0000731;GO:0000732;GO:0033045	K15365-ko03460 Fanconi anemia pathway	-
ENSG00000145362	1.3439	7.25016	-2.43159	1.82e-05	0.0010799	down	ANK2	ankyrin 2 [Source:HGNC Symbol;Acc:HGNC:493]	GO:0007010;GO:0005515;GO:0005886;GO:0007165;GO:0016020;GO:0005737;GO:0030054;GO:0045202;GO:0045211;GO:0005856;GO:0005829;GO:0016323;GO:0031430;GO:0044325;GO:0042383;GO:0016324;GO:0019899;GO:0006888;GO:0051117;GO:0050821;GO:0019901;GO:0031647;GO:0002027;GO:0010881;GO:0005622;GO:0030018;GO:0055117;GO:0030674;GO:0034613;GO:0010628;GO:0086015;GO:0086046;GO:0086091;GO:0051279;GO:0030315;GO:0060307;GO:…	K10380-ko04624 Toll and Imd signaling pathway;ko05205 Proteoglycans in cancer	KOG4177-Ankyrin[M]
ENSG00000141293	2.41529	6.37478	-1.40018	0.00118093	0.0265044	down	SKAP1	src kinase associated phosphoprotein 1 [Source:HGNC Symbol;Acc:HGNC:15605]	GO:0042101;GO:0005911;GO:0005886;GO:0005829;GO:0072659;GO:0045785;GO:0042169;GO:0032403;GO:0005515;GO:0009967;GO:0016020;GO:0005737;GO:0005634;GO:0045893;GO:0002376;GO:0002250;GO:0045944;GO:0019903;GO:0050852;GO:0019901;GO:0017124;GO:0005070	K17699-ko04015 Rap1 signaling pathway	-
ENSG00000136158	5.70329	16.8364	-1.56172	0.000404259	0.0120957	down	SPRY2	sprouty RTK signaling antagonist 2 [Source:HGNC Symbol;Acc:HGNC:11270]	GO:0016020;GO:0005856;GO:0005829;GO:0005634;GO:0070373;GO:0060541;GO:0060449;GO:0060437;GO:0060425;GO:0051387;GO:0048754;GO:0046580;GO:0045165;GO:0043407;GO:0043066;GO:0042472;GO:0040037;GO:0034260;GO:0031345;GO:0030324;GO:0008285;GO:0007605;GO:0000132;GO:0045595;GO:0005515;GO:0015630;GO:0005886;GO:0007275;GO:0005737;GO:0005874;GO:0009966;GO:0042995;GO:0010628;GO:0042127;GO:0071902;GO:0030335;GO:…	K17383-ko04013 MAPK signaling pathway - fly;ko05206 MicroRNAs in cancer	-
ENSG00000136155	25.2495	248.923	-3.30137	0.000353142	0.0109424	down	SCEL	sciellin [Source:HGNC Symbol;Acc:HGNC:10573]	GO:0005515;GO:0046872;GO:0008270;GO:0016020;GO:0005737;GO:0070062;GO:0009790;GO:0008544;GO:0030216;GO:0001533	-	-
ENSG00000116701	28.1667	7.28572	1.95085	0.000204645	0.00725631	up	NCF2	neutrophil cytosolic factor 2 [Source:HGNC Symbol;Acc:HGNC:7661]	GO:0034599;GO:0005515;GO:0055114;GO:0005829;GO:0005730;GO:0005737;GO:0002479;GO:0008022;GO:0045087;GO:0048010;GO:0009055;GO:0006968;GO:0006801;GO:0042554;GO:0045454;GO:0045730;GO:0043020;GO:0032010;GO:0001669;GO:0048365;GO:0016175	K08010-ko04145 Phagosome;ko04670 Leukocyte transendothelial migration;ko04380 Osteoclast differentiation;ko05140 Leishmaniasis	KOG4225-Sorbin and SH3 domain-containing protein[T]
ENSG00000101003	18.2187	4.22382	2.10879	0.0001843	0.00674347	up	GINS1	GINS complex subunit 1 [Source:HGNC Symbol;Acc:HGNC:28980]	GO:0005737;GO:0005634;GO:0006260;GO:0001833;GO:0032508;GO:0005654;GO:0043138;GO:0006271;GO:1902983;GO:0000811	-	KOG3303-Predicted alpha-helical protein, potentially involved in replication/repair[L]
ENSG00000106066	5.08287	22.8618	-2.16923	8.46e-06	0.000610143	down	CPVL	carboxypeptidase, vitellogenic like [Source:HGNC Symbol;Acc:HGNC:14399]	GO:0006508;GO:0008233;GO:0016787;GO:0004180;GO:0004185;GO:0070062;GO:0051603	-	KOG1282-Serine carboxypeptidases (lysosomal cathepsin A)[OE]
ENSG00000184347	3.22855	17.6689	-2.45225	6.6e-05	0.00299107	down	SLIT3	slit guidance ligand 3 [Source:HGNC Symbol;Acc:HGNC:11087]	GO:0005576;GO:0005739;GO:0005509;GO:0007275;GO:0005615;GO:0007399;GO:0030154;GO:0007411;GO:0030308;GO:0048495;GO:0048846;GO:0050919;GO:0032870;GO:0035385;GO:0051414;GO:0061364;GO:0070100;GO:0010629;GO:0009887;GO:0008285	K06850-ko04360 Axon guidance	KOG4237-Extracellular matrix protein slit, contains leucine-rich and EGF-like repeats[WT]
ENSG00000260537	0.634141	9.49169	-3.90379	2.09e-06	0.00021248	down	AC012184.2	-	GO:0005524;GO:0003676	-	-
ENSG00000127920	5.15687	12.6881	-1.29891	0.000291262	0.00955372	down	GNG11	G protein subunit gamma 11 [Source:HGNC Symbol;Acc:HGNC:4403]	GO:0005834;GO:0007165;GO:0004871;GO:0005515;GO:0005886;GO:0007186;GO:0016020;GO:0003924;GO:0071377	K04546-ko04014 Ras signaling pathway;ko04151 PI3K-Akt signaling pathway;ko04062 Chemokine signaling pathway;ko04724 Glutamatergic synapse;ko04727 GABAergic synapse;ko04725 Cholinergic synapse;ko04728 Dopaminergic synapse;ko04726 Serotonergic synapse;ko04723 Retrograde endocannabinoid signaling;ko04713 Circadian entrainment;ko05200 Pathways in cancer;ko05032 Morphine addiction;ko05034 Alcoholism	KOG4119-G protein gamma subunit[T]
ENSG00000186994	2.20269	6.86647	-1.6403	6.15e-05	0.00284756	down	KANK3	KN motif and ankyrin repeat domains 3 [Source:HGNC Symbol;Acc:HGNC:24796]	-	-	KOG0514-Ankyrin repeat protein[R]
ENSG00000173894	17.0949	1.87087	3.19179	8.72e-05	0.0036861	up	CBX2	chromobox 2 [Source:HGNC Symbol;Acc:HGNC:1552]	GO:0031519;GO:0005634;GO:0000792;GO:0000791;GO:0000122;GO:0035064;GO:0003682;GO:0005515;GO:0016569;GO:0006355;GO:0006351;GO:0003677;GO:0005654;GO:0030154;GO:0007548;GO:0035102;GO:0045137	-	-
ENSG00000100029	103.228	32.8161	1.65336	0.00157155	0.0322264	up	PES1	pescadillo ribosomal biogenesis factor 1 [Source:HGNC Symbol;Acc:HGNC:8848]	GO:0070545;GO:0005730;GO:0005634;GO:0000793;GO:0042254;GO:0033365;GO:0007000;GO:0006364;GO:0000463;GO:0005515;GO:0005694;GO:0005829;GO:0016020;GO:0003723;GO:0005654;GO:0008283;GO:0043021;GO:0000466;GO:0042273;GO:0030687;GO:0051726	-	KOG2481-Protein required for normal rRNA processing[A]
ENSG00000142623	9.37847	127.238	-3.76203	5.53e-05	0.00261413	down	PADI1	peptidyl arginine deiminase 1 [Source:HGNC Symbol;Acc:HGNC:18367]	GO:0005509;GO:0016787;GO:0005654;GO:0005829;GO:0005737;GO:0004668;GO:0018101;GO:0005634;GO:0070062;GO:0006325;GO:0036414	-	-
ENSG00000091651	17.4215	4.22037	2.04543	7.38e-05	0.00325038	up	ORC6	origin recognition complex subunit 6 [Source:HGNC Symbol;Acc:HGNC:17151]	GO:0051782;GO:0005515;GO:0001650;GO:0003677;GO:0005634;GO:0016020;GO:0006260;GO:0005664;GO:0005654;GO:0000082;GO:0006270;GO:0000808;GO:0003688	K02608-ko04110 Cell cycle;ko04111 Cell cycle - yeast;ko04113 Meiosis - yeast	KOG4557-Origin recognition complex, subunit 6[L]
ENSG00000090382	124.018	15002.9	-6.91855	2.09e-13	1.8e-10	down	LYZ	lysozyme [Source:HGNC Symbol;Acc:HGNC:6740]	GO:0016798;GO:0005576;GO:0008152;GO:0003824;GO:0016787;GO:0005615;GO:0006954;GO:0003796;GO:0042802;GO:0042742;GO:0070062;GO:0044267;GO:0001895;GO:0043312;GO:0019730;GO:0035580;GO:1904724;GO:0035578;GO:0019835	K13915-ko04970 Salivary secretion	-
ENSG00000120279	1.62141	5.38481	-1.73164	0.000260564	0.00869912	down	MYCT1	MYC target 1 [Source:HGNC Symbol;Acc:HGNC:23172]	GO:0005654;GO:0043231;GO:0005634;GO:0016021;GO:0016020	-	-
ENSG00000231971	6.73793	0.3743	4.17004	6.44e-05	0.00294658	up	AL078590.2	-	-	-	-
ENSG00000144857	7.21347	20.2302	-1.48774	0.000421602	0.0124852	down	BOC	BOC cell adhesion associated, oncogene regulated [Source:HGNC Symbol;Acc:HGNC:17173]	GO:0005887;GO:0007411;GO:0007224;GO:0045663;GO:0005886;GO:0007155;GO:0016021;GO:0016020;GO:0005515;GO:0051149;GO:0044295	K20020-ko04340 Hedgehog signaling pathway;ko04360 Axon guidance	-
ENSG00000108342	12.1726	0.56571	4.42743	1.04e-05	0.00069798	up	CSF3	colony stimulating factor 3 [Source:HGNC Symbol;Acc:HGNC:2438]	GO:0006955;GO:0005576;GO:0005125;GO:0008083;GO:0005615;GO:0014068;GO:0033138;GO:0045944;GO:0050731;GO:0051897;GO:0071345;GO:2000251;GO:0030838;GO:0019899;GO:0007275;GO:0032092;GO:0019221;GO:0008284;GO:0042993;GO:0005130;GO:0030851;GO:0045639;GO:1901215;GO:0071222;GO:0045471	K05423-ko04630 Jak-STAT signaling pathway;ko04151 PI3K-Akt signaling pathway;ko04060 Cytokine-cytokine receptor interaction;ko04640 Hematopoietic cell lineage;ko05144 Malaria	-
ENSG00000163406	5.14654	14.2117	-1.4654	0.00138253	0.0295706	down	SLC15A2	solute carrier family 15 member 2 [Source:HGNC Symbol;Acc:HGNC:10921]	GO:0055085;GO:0015293;GO:0016020;GO:0005215;GO:0015031;GO:0006810;GO:0016021;GO:0005886;GO:0015992;GO:0005515;GO:0070062;GO:0015833;GO:0005887;GO:0015198;GO:0006857;GO:0006811;GO:0015893;GO:0015333	-	KOG1237-H+/oligopeptide symporter[E]
ENSG00000167513	48.1498	8.84944	2.44387	0.000496637	0.0142367	up	CDT1	chromatin licensing and DNA replication factor 1 [Source:HGNC Symbol;Acc:HGNC:24576]	GO:0005634;GO:2001178;GO:2000105;GO:1905341;GO:1902426;GO:0051301;GO:0033262;GO:0033044;GO:0030174;GO:0000076;GO:0003677;GO:0000776;GO:1902595;GO:0031334;GO:0072708;GO:0071163;GO:0035563;GO:0003682;GO:1905342;GO:0051383;GO:0005515;GO:0016604;GO:0005694;GO:0007049;GO:0006260;GO:0007059;GO:0000775;GO:0000777;GO:0005829;GO:0005654;GO:0000082;GO:0051315;GO:0000278;GO:0000083	-	KOG4762-DNA replication factor[L]
ENSG00000253958	1.55897	11.1181	-2.83424	5.97e-05	0.0027822	down	CLDN23	claudin 23 [Source:HGNC Symbol;Acc:HGNC:17591]	GO:0005886;GO:0005198;GO:0016021;GO:0016020;GO:0030054;GO:0005923;GO:0042802;GO:0016338	K06087-ko04514 Cell adhesion molecules (CAMs);ko04530 Tight junction;ko04670 Leukocyte transendothelial migration;ko05160 Hepatitis C	-
ENSG00000136732	11.4198	39.3657	-1.7854	3.8e-05	0.00193633	down	GYPC	glycophorin C (Gerbich blood group) [Source:HGNC Symbol;Acc:HGNC:4704]	GO:0030863;GO:0016020;GO:0005886;GO:0016021;GO:0050900;GO:0005515;GO:0005887;GO:0004872;GO:0005102;GO:0042803;GO:0050839;GO:0007156;GO:0007157;GO:0005913;GO:0008037	K06576-ko05144 Malaria	-
ENSG00000087494	108.498	6.64712	4.02879	2.73e-08	5.39e-06	up	PTHLH	parathyroid hormone like hormone [Source:HGNC Symbol;Acc:HGNC:9607]	GO:0005576;GO:0005654;GO:0005829;GO:0005794;GO:0005737;GO:0005634;GO:0005179;GO:0032330;GO:0007267;GO:0005615;GO:0008285;GO:0010468;GO:0008544;GO:0008284;GO:0002076;GO:0007565;GO:0051428;GO:0030819;GO:0046058;GO:0007189;GO:0001501;GO:0032331	-	-
ENSG00000090776	102.508	31.7118	1.69264	0.00168196	0.0339438	up	EFNB1	ephrin B1 [Source:HGNC Symbol;Acc:HGNC:3226]	GO:0045121;GO:0005737;GO:0005634;GO:0042102;GO:0031295;GO:0009880;GO:0007411;GO:0001755;GO:0046875;GO:0005515;GO:0005886;GO:0016020;GO:0016021;GO:0007275;GO:0045202;GO:0007399;GO:0030154;GO:0048013;GO:0070062;GO:0005887;GO:0007267;GO:0007155	K05463-ko04360 Axon guidance	KOG3858-Ephrin, ligand for Eph receptor tyrosine kinase[T]
ENSG00000105122	3.62281	10.2607	-1.50195	0.0023589	0.0436868	down	RASAL3	RAS protein activator like 3 [Source:HGNC Symbol;Acc:HGNC:26129]	GO:0043547;GO:0007165;GO:0016020;GO:0005737;GO:0043087;GO:0005096;GO:0005829;GO:0070062;GO:0005938;GO:0000165;GO:0031235;GO:0046580;GO:0051142;GO:0098562	K17634-ko04014 Ras signaling pathway	KOG3508-GTPase-activating protein[R]
ENSG00000186567	26.8779	6.69759	2.00471	0.00056622	0.0155089	up	CEACAM19	carcinoembryonic antigen related cell adhesion molecule 19 [Source:HGNC Symbol;Acc:HGNC:31951]	GO:0016021;GO:0016020;GO:0005515	-	-
ENSG00000181938	23.2303	5.60498	2.05123	0.0027345	0.0488034	up	GINS3	GINS complex subunit 3 [Source:HGNC Symbol;Acc:HGNC:25851]	GO:0005654;GO:0005634;GO:0006260;GO:0006271	-	-
ENSG00000107562	6.29236	142.833	-4.50459	6.04e-11	2.85e-08	down	CXCL12	C-X-C motif chemokine ligand 12 [Source:HGNC Symbol;Acc:HGNC:10672]	GO:0006955;GO:0005576;GO:0008083;GO:0006935;GO:0005125;GO:0005615;GO:0008009;GO:0006952;GO:0009897;GO:0042056;GO:0050918;GO:0070062;GO:0007186;GO:0007165;GO:0007155;GO:0005102;GO:0042379;GO:0060326;GO:1903237;GO:2000107;GO:2000406;GO:0009615;GO:0008064;GO:1902230;GO:0090026;GO:0007411;GO:0008015;GO:0006874;GO:0090280;GO:0070098;GO:0050930;GO:0045236;GO:0045785;GO:0005886;GO:0005737;GO:1990478;GO:…	K10031-ko04064 NF-kappa B signaling pathway;ko04060 Cytokine-cytokine receptor interaction;ko04670 Leukocyte transendothelial migration;ko04672 Intestinal immune network for IgA production;ko04062 Chemokine signaling pathway;ko04360 Axon guidance;ko05200 Pathways in cancer;ko05323 Rheumatoid arthritis	-
ENSG00000213203	2.37742	7.74765	-1.70436	3.3e-05	0.00172952	down	GIMAP1	GTPase, IMAP family member 1 [Source:HGNC Symbol;Acc:HGNC:23237]	GO:0005525;GO:0005794;GO:0005789;GO:0005783;GO:0000166;GO:0016021;GO:0016020;GO:0000139	-	-
ENSG00000160886	38.8921	6.81271	2.51318	0.000871131	0.0211425	up	LY6K	lymphocyte antigen 6 family member K [Source:HGNC Symbol;Acc:HGNC:24225]	GO:0005576;GO:0005886;GO:0016020;GO:0005737;GO:0031225;GO:0006501;GO:0009986;GO:0030317;GO:0007339	-	-
ENSG00000102802	2.33534	16.6932	-2.83756	1.9e-05	0.00112263	down	MEDAG	mesenteric estrogen dependent adipogenesis [Source:HGNC Symbol;Acc:HGNC:25926]	GO:0005737;GO:0045600	-	-
ENSG00000129195	8.15353	2.03279	2.00396	0.00133453	0.02892	up	PIMREG	PICALM interacting mitotic regulator [Source:HGNC Symbol;Acc:HGNC:25483]	GO:0005515;GO:0051301;GO:0005829;GO:0005730;GO:0005634;GO:0007049	-	-
ENSG00000128578	8.60666	0.816929	3.39717	2e-05	0.00115556	up	STRIP2	striatin interacting protein 2 [Source:HGNC Symbol;Acc:HGNC:22209]	GO:0005829;GO:0005737;GO:0007010;GO:0003674;GO:0008360;GO:0016477	-	KOG3680-Uncharacterized conserved protein[S]
ENSG00000169594	30.2755	7.00097	2.11253	0.00120898	0.0269406	up	BNC1	basonuclin 1 [Source:HGNC Symbol;Acc:HGNC:1081]	GO:0006355;GO:0006351;GO:0003677;GO:0005654;GO:0046872;GO:0005737;GO:0005634;GO:0003676;GO:0030154;GO:0007283;GO:0003700;GO:0008544;GO:0008284	-	-
ENSG00000166313	4.80722	14.2599	-1.56869	0.000673174	0.0175511	down	APBB1	amyloid beta precursor protein binding family B member 1 [Source:HGNC Symbol;Acc:HGNC:581]	GO:0007165;GO:0005515;GO:0005886;GO:0016569;GO:0006355;GO:0006351;GO:0016020;GO:0016607;GO:0005737;GO:0005634;GO:0006915;GO:0006974;GO:0045202;GO:0045893;GO:0042995;GO:0008134;GO:0007409;GO:0030027;GO:0030426;GO:0001540;GO:0005654;GO:0003682;GO:0007050;GO:0043065;GO:0042393;GO:0070064;GO:0000122;GO:0030308;GO:0043967;GO:0050760;GO:1990812;GO:1990761;GO:0048471;GO:0045211;GO:0044304;GO:0043234;GO:…	K04529-ko05010 Alzheimer's disease	-
ENSG00000168952	1.42687	5.6126	-1.97582	0.0012031	0.026877	down	STXBP6	syntaxin binding protein 6 [Source:HGNC Symbol;Acc:HGNC:19666]	GO:0016192;GO:0016021;GO:0016020;GO:0005737;GO:0005886;GO:0017049;GO:0098641;GO:0098609;GO:0005913;GO:0006893;GO:0000145;GO:0051601;GO:0005546;GO:0035542;GO:0045920	-	-
ENSG00000197696	38.863	6.9375	2.48591	0.000806937	0.0198852	up	NMB	neuromedin B [Source:HGNC Symbol;Acc:HGNC:7842]	GO:0005576;GO:0005515;GO:0007218;GO:0007165;GO:0007267;GO:0005179;GO:0043005;GO:0050482;GO:0046888;GO:0046887;GO:0042593;GO:0008284;GO:0007204;GO:0031710	K05223-ko04080 Neuroactive ligand-receptor interaction	-
ENSG00000204136	2.41422	18.1138	-2.90746	2.25e-11	1.21e-08	down	GGTA1P	glycoprotein, alpha-galactosyltransferase 1 pseudogene [Source:HGNC Symbol;Acc:HGNC:4253]	-	-	-
ENSG00000130304	5.96169	17.7865	-1.57699	6.89e-05	0.00308548	down	SLC27A1	solute carrier family 27 member 1 [Source:HGNC Symbol;Acc:HGNC:10995]	GO:0008152;GO:0003824;GO:0016021;GO:0001676;GO:0004467;GO:0031957;GO:0015245;GO:0015908;GO:0005886;GO:0005783;GO:0071902;GO:0033211;GO:0032868;GO:0031652;GO:0015909;GO:0009409;GO:0001579;GO:0042803;GO:0019216;GO:0006646;GO:0016874;GO:0006631;GO:0006629;GO:0000166;GO:0016020;GO:0005737;GO:0006810;GO:0006869;GO:0012505;GO:0006661;GO:0006659;GO:0032049;GO:0006656;GO:0006655;GO:0006654;GO:0071072	K08745-ko03320 PPAR signaling pathway;ko04931 Insulin resistance	KOG1179-Very long-chain acyl-CoA synthetase/fatty acid transporter[I]
ENSG00000130303	430.517	58.1109	2.88919	0.000181378	0.00666795	up	BST2	bone marrow stromal cell antigen 2 [Source:HGNC Symbol;Acc:HGNC:1119]	GO:0009986;GO:0045087;GO:1901253;GO:0045071;GO:0035456;GO:0035455;GO:0034341;GO:0009615;GO:0004871;GO:0005515;GO:0005886;GO:0042803;GO:0010951;GO:0005794;GO:0005829;GO:0016021;GO:0016020;GO:0005737;GO:0003723;GO:0031225;GO:0051607;GO:0045121;GO:0002376;GO:0005768;GO:0070062;GO:0032956;GO:0005770;GO:0005887;GO:0043312;GO:0043123;GO:0042113;GO:0007267;GO:0016324;GO:0007275;GO:0030308;GO:0035577;GO:…	-	-
ENSG00000120539	18.2747	4.84842	1.91426	0.000395879	0.0118991	up	MASTL	microtubule associated serine/threonine kinase like [Source:HGNC Symbol;Acc:HGNC:19042]	GO:0051301;GO:0016310;GO:0016301;GO:0016740;GO:0005654;GO:0006468;GO:0005524;GO:0004674;GO:0000166;GO:0004672;GO:0005737;GO:0005634;GO:0007049;GO:0006974;GO:0005856;GO:0005813;GO:0005815;GO:0035556;GO:0018105;GO:0032154;GO:0051726;GO:0000278;GO:0051721;GO:0000086;GO:0032515;GO:0051441;GO:0007147	-	-
ENSG00000131471	2.02167	7.33634	-1.85951	3.46e-05	0.00178647	down	AOC3	amine oxidase, copper containing 3 [Source:HGNC Symbol;Acc:HGNC:550]	GO:1902283;GO:0005886;GO:0042803;GO:0007155;GO:0055114;GO:0016491;GO:0046872;GO:0016021;GO:0016020;GO:0005737;GO:0006954;GO:0005509;GO:0005507;GO:0005515;GO:0005902;GO:0006805;GO:0048038;GO:0009308;GO:0009986;GO:0046982;GO:0005783;GO:0046677;GO:0008131;GO:0052593;GO:0052594;GO:0052595;GO:0052596;GO:0005794;GO:0005769	K00276-ko00260 Glycine, serine and threonine metabolism;ko00350 Tyrosine metabolism;ko00360 Phenylalanine metabolism;ko00410 beta-Alanine metabolism;ko00950 Isoquinoline alkaloid biosynthesis;ko00960 Tropane, piperidine and pyridine alkaloid biosynthesis	KOG1186-Copper amine oxidase[Q]
ENSG00000134533	2.58534	9.9166	-1.93949	5.05e-05	0.00243932	down	RERG	RAS like estrogen regulated growth inhibitor [Source:HGNC Symbol;Acc:HGNC:15980]	GO:0003924;GO:0005829;GO:0005525;GO:0007165;GO:0000166;GO:0016020;GO:0005737;GO:0005634;GO:0030331;GO:0008285;GO:0019003;GO:0030308;GO:0009725;GO:0007264	-	KOG0395-Ras-related GTPase[R]
ENSG00000134531	75.2193	731.055	-3.2808	5.36e-05	0.00254475	down	EMP1	epithelial membrane protein 1 [Source:HGNC Symbol;Acc:HGNC:3333]	GO:0005886;GO:0005515;GO:0016049;GO:0016020;GO:0016021;GO:0007275;GO:0008283;GO:0008219;GO:0008544;GO:0032060	-	-
ENSG00000094804	14.4149	2.10009	2.77904	6.8e-06	0.000524423	up	CDC6	cell division cycle 6 [Source:HGNC Symbol;Acc:HGNC:1744]	GO:1904385;GO:1904117;GO:0048146;GO:0045737;GO:0051301;GO:0006270;GO:0005515;GO:0005654;GO:0005829;GO:0005524;GO:0000166;GO:0005794;GO:0005737;GO:0005634;GO:0007049;GO:0006260;GO:0000082;GO:0008285;GO:0000278;GO:0019900;GO:0000079;GO:0000076;GO:0000083;GO:0000922;GO:0008156;GO:0030071;GO:0051233;GO:0007089;GO:0032467;GO:0051984	K02213-ko04110 Cell cycle;ko04111 Cell cycle - yeast;ko04113 Meiosis - yeast	KOG2227-Pre-initiation complex, subunit CDC6, AAA+ superfamily ATPase[LD]
ENSG00000147509	6.5979	0.674099	3.29097	2.83e-05	0.00153698	up	RGS20	regulator of G protein signaling 20 [Source:HGNC Symbol;Acc:HGNC:14600]	GO:0005515;GO:0043547;GO:0016020;GO:0005737;GO:0005634;GO:0005886;GO:0031410;GO:0009968;GO:0005096;GO:0008277;GO:0005802	-	KOG3589-G protein signaling regulators[T]
ENSG00000146670	32.0329	6.22201	2.3641	1.04e-06	0.000120951	up	CDCA5	cell division cycle associated 5 [Source:HGNC Symbol;Acc:HGNC:14626]	GO:0008278;GO:0005634;GO:0005737;GO:0000790;GO:0000785;GO:0007064;GO:0000278;GO:0005515;GO:0005694;GO:0051301;GO:0005654;GO:0007049;GO:0005829;GO:0003682;GO:0007062;GO:0031536;GO:0007080;GO:0000775;GO:0006302;GO:0007076;GO:0071922	K17390-ko05206 MicroRNAs in cancer	-
ENSG00000113594	1.22674	6.30751	-2.36225	1.78e-05	0.00106087	down	LIFR	LIF receptor alpha [Source:HGNC Symbol;Acc:HGNC:6597]	GO:0005615;GO:0008284;GO:0005576;GO:0005515;GO:0005886;GO:0016020;GO:0016021;GO:0004896;GO:0070062;GO:0005887;GO:0007166;GO:0019838;GO:0043235;GO:0005127;GO:0004897;GO:0034097;GO:0070120;GO:0038165;GO:0019221;GO:0048861;GO:0004923;GO:0004924	K05058-ko04630 Jak-STAT signaling pathway;ko04060 Cytokine-cytokine receptor interaction;ko04550 Signaling pathways regulating pluripotency of stem cells	-
ENSG00000111666	6.65377	21.5914	-1.69821	3.88e-06	0.000339827	down	CHPT1	choline phosphotransferase 1 [Source:HGNC Symbol;Acc:HGNC:17852]	GO:0008654;GO:0016780;GO:0006629;GO:0005794;GO:0043231;GO:0016740;GO:0046872;GO:0016020;GO:0016021;GO:0000139;GO:0001558;GO:0019992;GO:0006656;GO:0006663;GO:0006657;GO:0004142	K00994-ko00564 Glycerophospholipid metabolism;ko00565 Ether lipid metabolism;ko00440 Phosphonate and phosphinate metabolism;ko05231 Choline metabolism in cancer	KOG2877-sn-1,2-diacylglycerol ethanolamine- and cholinephosphotranferases[I]
ENSG00000111665	28.0841	7.41837	1.92058	0.000641151	0.0170004	up	CDCA3	cell division cycle associated 3 [Source:HGNC Symbol;Acc:HGNC:14624]	GO:0005515;GO:0005829;GO:0051301;GO:0016567;GO:0005737;GO:0007049;GO:0003674;GO:0008150;GO:0005575;GO:0005913	-	-
ENSG00000109205	0.106067	7.08757	-6.06224	1.25e-07	1.94e-05	down	ODAM	odontogenic, ameloblast asssociated [Source:HGNC Symbol;Acc:HGNC:26043]	GO:0005737;GO:0005576;GO:0005634;GO:0009611;GO:0005615;GO:0006954;GO:0005515;GO:0043547;GO:0001934;GO:0010628;GO:0031214;GO:0032956;GO:0042475;GO:0044267;GO:0060054;GO:0071944;GO:0099512	-	-
ENSG00000104324	5.09918	14.9186	-1.54878	0.000244201	0.00830423	down	CPQ	carboxypeptidase Q [Source:HGNC Symbol;Acc:HGNC:16910]	GO:0005794;GO:0005783;GO:0005764;GO:0005615;GO:0042246;GO:0006590;GO:0006508;GO:0005576;GO:0008233;GO:0042803;GO:0016787;GO:0046872;GO:0005737;GO:0004180;GO:0008237;GO:0070062;GO:0043171;GO:0070573	-	KOG2195-Transferrin receptor and related proteins containing the protease-associated (PA) domain[OPR]
ENSG00000104327	138.439	9.42807	3.87614	0.00150063	0.0312537	up	CALB1	calbindin 1 [Source:HGNC Symbol;Acc:HGNC:1434]	GO:0045202;GO:0044297;GO:0043197;GO:0043195;GO:0043025;GO:0043005;GO:0030425;GO:0030424;GO:0005829;GO:0005737;GO:0005634;GO:0005622;GO:1900271;GO:0099509;GO:0072286;GO:0072221;GO:0072205;GO:0071310;GO:0060041;GO:0051480;GO:0048167;GO:0035502;GO:0010842;GO:0007626;GO:0007611;GO:0005509;GO:0005515;GO:0008270;GO:0046872;GO:0055074;GO:0070062;GO:0044267;GO:0007616;GO:0007614;GO:0005499	K14757-ko04961 Endocrine and other factor-regulated calcium reabsorption	KOG0027-Calmodulin and related proteins (EF-Hand superfamily)[T]
ENSG00000253669	5.36752	0.237017	4.50119	0.000161963	0.00614082	up	AP003356.1	-	-	-	-
ENSG00000263429	0.294823	7.77575	-4.72106	1.72e-07	2.58e-05	down	LINC00675	long intergenic non-protein coding RNA 675 [Source:HGNC Symbol;Acc:HGNC:44356]	GO:0016021;GO:0016020	-	-
ENSG00000132517	10.2752	1.91226	2.42581	5.67e-07	7.22e-05	up	SLC52A1	solute carrier family 52 member 1 [Source:HGNC Symbol;Acc:HGNC:30225]	GO:0005886;GO:0005887;GO:0016021;GO:0016020;GO:0006810;GO:0046718;GO:0032217;GO:0032218;GO:0001618;GO:0006771	-	KOG4255-Uncharacterized conserved protein[S]
ENSG00000132514	1.35917	10.9069	-3.00444	2.09e-06	0.00021248	down	CLEC10A	C-type lectin domain containing 10A [Source:HGNC Symbol;Acc:HGNC:16916]	GO:0030246;GO:0016021;GO:0016020;GO:0002376;GO:0045087;GO:0002250;GO:0005886;GO:0006897;GO:0002223	-	-
ENSG00000085999	7.84654	2.13236	1.87961	0.000623033	0.0166854	up	RAD54L	RAD54 like (S. cerevisiae) [Source:HGNC Symbol;Acc:HGNC:9826]	GO:0005524;GO:0051276;GO:0042493;GO:0010212;GO:0008340;GO:0006974;GO:0006302;GO:0000724;GO:0051321;GO:0005515;GO:0003677;GO:0004386;GO:0016787;GO:0005654;GO:0000166;GO:0005634;GO:0006281;GO:0006310;GO:0000733;GO:0036310	K10875-ko03440 Homologous recombination	KOG0390-DNA repair protein, SNF2 family[L]
ENSG00000142945	29.6333	8.63223	1.77941	0.000639138	0.0169657	up	KIF2C	kinesin family member 2C [Source:HGNC Symbol;Acc:HGNC:6393]	GO:0003777;GO:0005524;GO:0000166;GO:0008017;GO:0003774;GO:0007018;GO:0000775;GO:0000278;GO:0005515;GO:0005813;GO:0005694;GO:0051301;GO:0005654;GO:0005829;GO:0016020;GO:0005737;GO:0005634;GO:0007049;GO:0005856;GO:0005874;GO:0007059;GO:0000776;GO:0000777;GO:0006890;GO:0016887;GO:0007062;GO:0019886;GO:0008283;GO:0051310;GO:0051315;GO:0005871;GO:0005881;GO:0019237;GO:0007080;GO:0051983;GO:0051010;GO:…	-	KOG0246-Kinesin-like protein[Z]
ENSG00000133392	8.60815	26.6847	-1.63224	0.00198902	0.0385259	down	MYH11	myosin heavy chain 11 [Source:HGNC Symbol;Acc:HGNC:7569]	GO:0042470;GO:0005515;GO:0003779;GO:0016459;GO:0051015;GO:0003774;GO:0005524;GO:0000166;GO:0005516;GO:0005829;GO:0070062;GO:0032982;GO:0006936;GO:0008307;GO:0006939;GO:0005859;GO:0048251;GO:0030241;GO:0048739	K10352-ko04530 Tight junction	KOG0161-Myosin class II heavy chain[Z]
ENSG00000205364	1.59407	7.89925	-2.309	0.000401815	0.0120625	down	MT1M	metallothionein 1M [Source:HGNC Symbol;Acc:HGNC:14296]	GO:0008270;GO:0046872;GO:0005737;GO:0005634;GO:0048471;GO:0045926;GO:0071294	K14739-ko04978 Mineral absorption;ko04212 Longevity regulating pathway - worm	-
ENSG00000090889	9.85198	2.92212	1.7534	0.00113283	0.0256818	up	KIF4A	kinesin family member 4A [Source:HGNC Symbol;Acc:HGNC:13339]	GO:0003777;GO:0045171;GO:1904115;GO:0005694;GO:0003677;GO:0005654;GO:0005524;GO:0000166;GO:0016020;GO:0005737;GO:0005634;GO:0008017;GO:0005856;GO:0005874;GO:0007018;GO:0005819;GO:0030496;GO:0005515;GO:0005829;GO:0006890;GO:0019886;GO:0005871;GO:0016363;GO:0000281;GO:0008089;GO:0005876;GO:0008574;GO:0006996;GO:0051256	-	KOG0244-Kinesin-like protein[Z]
ENSG00000229891	2.2731	9.33641	-2.0382	0.000502351	0.0143132	down	LINC01315	long intergenic non-protein coding RNA 1315 [Source:HGNC Symbol;Acc:HGNC:50513]	-	-	-
ENSG00000182950	5.01699	0.475861	3.39821	0.000618846	0.0165987	up	ODF3L1	outer dense fiber of sperm tails 3 like 1 [Source:HGNC Symbol;Acc:HGNC:28735]	-	-	-
ENSG00000102886	10.3738	35.9066	-1.7913	0.0023748	0.0437816	down	GDPD3	glycerophosphodiester phosphodiesterase domain containing 3 [Source:HGNC Symbol;Acc:HGNC:28638]	GO:0006629;GO:0016787;GO:0046872;GO:0016021;GO:0016020;GO:0008081;GO:0070062	-	KOG2258-Glycerophosphoryl diester phosphodiesterase[C]
ENSG00000198736	61.5555	18.6458	1.72304	0.00246625	0.0450314	up	MSRB1	methionine sulfoxide reductase B1 [Source:HGNC Symbol;Acc:HGNC:14133]	GO:0015629;GO:0005737;GO:0005634;GO:0045087;GO:0030091;GO:0030041;GO:0070191;GO:0033743;GO:0008270;GO:0003779;GO:0055114;GO:0016491;GO:0046872;GO:0005856;GO:0002376;GO:0006979;GO:0016671;GO:0005575;GO:0005829;GO:0005654	-	-
ENSG00000119514	8.10525	24.056	-1.56947	0.000866724	0.0210678	down	GALNT12	polypeptide N-acetylgalactosaminyltransferase 12 [Source:HGNC Symbol;Acc:HGNC:19877]	GO:0005794;GO:0016757;GO:0030246;GO:0016740;GO:0046872;GO:0016021;GO:0016020;GO:0000139;GO:0006486;GO:0016266;GO:0004653	K00710-ko00512 Mucin type O-glycan biosynthesis	KOG3736-Polypeptide N-acetylgalactosaminyltransferase[O]
ENSG00000166770	1.50957	7.47746	-2.30841	1.44e-05	0.00089757	down	ZNF667-AS1	ZNF667 antisense RNA 1 (head to head) [Source:HGNC Symbol;Acc:HGNC:44321]	-	-	-
ENSG00000124374	2.65777	7.66024	-1.52717	0.000527905	0.0148306	down	PAIP2B	poly(A) binding protein interacting protein 2B [Source:HGNC Symbol;Acc:HGNC:29200]	GO:0006417;GO:0005515;GO:0005737;GO:0000900;GO:0045947	-	-
ENSG00000167419	0.292942	153.974	-9.03785	0.000253048	0.00852081	down	LPO	lactoperoxidase [Source:HGNC Symbol;Acc:HGNC:6678]	GO:0055114;GO:0020037;GO:0042742;GO:0098869;GO:0006979;GO:0004601;GO:0036393;GO:0018969;GO:0005576;GO:0016491;GO:0046872;GO:0005615;GO:0005737;GO:0070062;GO:0042744;GO:0016323;GO:0001580	K12550-ko04970 Salivary secretion	KOG2408-Peroxidase/oxygenase[R]
ENSG00000173198	1.45571	6.81975	-2.22799	8.16e-05	0.00351336	down	CYSLTR1	cysteinyl leukotriene receptor 1 [Source:HGNC Symbol;Acc:HGNC:17451]	GO:0007165;GO:0004871;GO:0005515;GO:0005886;GO:0007186;GO:0004930;GO:0016021;GO:0016020;GO:0005887;GO:0004974;GO:0061737;GO:0006952;GO:0007200;GO:0007204;GO:0007585;GO:0007218;GO:0008528;GO:0003013;GO:0007166;GO:0006935;GO:0006816;GO:0002437	K04322-ko04020 Calcium signaling pathway;ko04080 Neuroactive ligand-receptor interaction	-
ENSG00000222037	14.8799	0.886639	4.06887	0.00232161	0.0431289	up	IGLC6	immunoglobulin lambda constant 6 (gene/pseudogene) [Source:HGNC Symbol;Acc:HGNC:5860]	-	-	-
ENSG00000186352	8.90311	27.2356	-1.61311	0.000237292	0.00811512	down	ANKRD37	ankyrin repeat domain 37 [Source:HGNC Symbol;Acc:HGNC:29593]	GO:0005737;GO:0005634;GO:0005739;GO:0005829	-	KOG0504-FOG: Ankyrin repeat[R]
ENSG00000205592	0.0001	5.38558	-15.7168	4.68e-05	0.00228731	down	MUC19	mucin 19, oligomeric [Source:HGNC Symbol;Acc:HGNC:14362]	-	-	-
ENSG00000162444	2.86668	14.8438	-2.3724	0.000219294	0.00765176	down	RBP7	retinol binding protein 7 [Source:HGNC Symbol;Acc:HGNC:30316]	GO:0008289;GO:0005215;GO:0006810;GO:0005501;GO:0005515;GO:0005737;GO:0016918;GO:0019841	-	KOG4015-Fatty acid-binding protein FABP[I]
ENSG00000179750	49.1625	5.00061	3.29738	1.1e-07	1.74e-05	up	APOBEC3B	apolipoprotein B mRNA editing enzyme catalytic subunit 3B [Source:HGNC Symbol;Acc:HGNC:17352]	GO:0016787;GO:0003824;GO:0005634;GO:0046872;GO:0008270;GO:0003723;GO:0002376;GO:0045087;GO:0051607;GO:0016814;GO:0047844;GO:0010529	-	-
ENSG00000065809	16.3959	59.0519	-1.84865	0.000903475	0.0217292	down	FAM107B	family with sequence similarity 107 member B [Source:HGNC Symbol;Acc:HGNC:23726]	-	-	-
ENSG00000116141	13.8878	3.92206	1.82413	0.000728847	0.0184015	up	MARK1	microtubule affinity regulating kinase 1 [Source:HGNC Symbol;Acc:HGNC:6896]	GO:0005886;GO:0016310;GO:0016301;GO:0016740;GO:0006468;GO:0005524;GO:0004674;GO:0000166;GO:0004672;GO:0046872;GO:0016020;GO:0005737;GO:0016055;GO:0005856;GO:0000226;GO:0030010;GO:0000287;GO:0008289;GO:0007010;GO:0005546;GO:0035556;GO:0001764;GO:0001786;GO:0050321;GO:0015630;GO:0070300	-	KOG0586-Serine/threonine protein kinase[R]
ENSG00000258955	17.0791	1.32483	3.68835	0.000191114	0.00690879	up	LINC00519	long intergenic non-protein coding RNA 519 [Source:HGNC Symbol;Acc:HGNC:19838]	-	-	-
ENSG00000170915	1.63461	5.97196	-1.86926	0.00141362	0.0298808	down	PAQR8	progestin and adipoQ receptor family member 8 [Source:HGNC Symbol;Acc:HGNC:15708]	GO:0005886;GO:0005794;GO:0016021;GO:0016020;GO:0007275;GO:0030154;GO:0043401;GO:0008289;GO:0048477;GO:0005496;GO:0003707;GO:0048545	-	KOG0748-Predicted membrane proteins, contain hemolysin III domain[RT]
ENSG00000111913	1.50191	7.10452	-2.24194	2.56e-05	0.00141825	down	RIPOR2	RHO family interacting cell polarization regulator 2 [Source:HGNC Symbol;Acc:HGNC:13872]	GO:2001107;GO:2000391;GO:1905872;GO:1903904;GO:0005515;GO:0005886;GO:0005739;GO:0048741;GO:0007605;GO:0016020;GO:0005737;GO:0007275;GO:0030154;GO:0005856;GO:0042995;GO:2000114;GO:0030175;GO:0032420;GO:0007517;GO:0060171;GO:0051491;GO:0007162;GO:0071889;GO:1901741;GO:2000405;GO:0090023;GO:0045663;GO:0035024;GO:1990869;GO:0016324;GO:0071260;GO:0060088;GO:0051260;GO:0045184;GO:0042802	-	-
ENSG00000180263	15.5955	4.13282	1.91593	0.000125213	0.00497462	up	FGD6	FYVE, RhoGEF and PH domain containing 6 [Source:HGNC Symbol;Acc:HGNC:21740]	GO:0043547;GO:0035023;GO:0005089;GO:0005794;GO:0046872;GO:0005737;GO:0005856;GO:0005085;GO:0007010;GO:0030027;GO:0001726;GO:0008360;GO:0030036;GO:0043087;GO:0046847;GO:0031267	-	-
ENSG00000164093	9.3149	1.48186	2.65213	5.85e-06	0.000461962	up	PITX2	paired like homeodomain 2 [Source:HGNC Symbol;Acc:HGNC:9005]	GO:0005737;GO:0005667;GO:0005634;GO:2000288;GO:0070986;GO:0061325;GO:0061031;GO:0060578;GO:0060577;GO:0060460;GO:0060412;GO:0055123;GO:0055015;GO:0055009;GO:0055007;GO:0048738;GO:0048557;GO:0048536;GO:0045944;GO:0045893;GO:0043388;GO:0042476;GO:0042475;GO:0042127;GO:0035993;GO:0035886;GO:0035116;GO:0033189;GO:0031076;GO:0030334;GO:0030324;GO:0030182;GO:0021983;GO:0021855;GO:0021763;GO:0016055;GO:…	K04686-ko04350 TGF-beta signaling pathway	KOG0486-Transcription factor PTX1, contains HOX domain[K]
ENSG00000169116	4.20903	15.3505	-1.86672	0.00113684	0.0257484	down	PARM1	prostate androgen-regulated mucin-like protein 1 [Source:HGNC Symbol;Acc:HGNC:24536]	GO:0016021;GO:0016020;GO:0005886;GO:0005794;GO:0005829;GO:0005634;GO:0043231;GO:0000139;GO:0005768;GO:0005769;GO:0010008;GO:0005770;GO:0051973	-	-
ENSG00000154721	1.51807	6.66806	-2.13503	7.7e-06	0.000565351	down	JAM2	junctional adhesion molecule 2 [Source:HGNC Symbol;Acc:HGNC:14686]	GO:0007162;GO:0046982;GO:0005515;GO:0005886;GO:0016021;GO:0016020;GO:0030054;GO:0050900;GO:0005887;GO:0005923;GO:0030198;GO:0016337	K06735-ko04514 Cell adhesion molecules (CAMs);ko04530 Tight junction;ko04670 Leukocyte transendothelial migration;ko05120 Epithelial cell signaling in Helicobacter pylori infection	-
ENSG00000170423	14.3444	317.737	-4.46927	1.13e-06	0.000128582	down	KRT78	keratin 78 [Source:HGNC Symbol;Acc:HGNC:28926]	GO:0005882;GO:0005198;GO:0005615;GO:0045095;GO:0005829;GO:0070062;GO:0031424;GO:0070268	-	-
ENSG00000177614	8.95654	0.983316	3.18721	0.000330186	0.0104875	up	PGBD5	piggyBac transposable element derived 5 [Source:HGNC Symbol;Acc:HGNC:19405]	GO:0016021;GO:0016020	-	-
ENSG00000136160	1.57593	6.56546	-2.0587	7.66e-07	9.31e-05	down	EDNRB	endothelin receptor type B [Source:HGNC Symbol;Acc:HGNC:3180]	GO:0045121;GO:0031965;GO:0005886;GO:0016020;GO:0071222;GO:0060406;GO:0051930;GO:0050678;GO:0048484;GO:0048265;GO:0043473;GO:0048066;GO:0043066;GO:0042311;GO:0042310;GO:0042045;GO:0035815;GO:0035810;GO:0035645;GO:0032496;GO:0031620;GO:0030318;GO:0019934;GO:0019233;GO:0014070;GO:0008284;GO:0014043;GO:0008217;GO:0007568;GO:0007422;GO:0007497;GO:0007204;GO:0007200;GO:0007186;GO:0006885;GO:0001755;GO:…	K04198-ko04020 Calcium signaling pathway;ko04022 cGMP - PKG signaling pathway;ko04080 Neuroactive ligand-receptor interaction;ko04916 Melanogenesis;ko05200 Pathways in cancer	KOG3656-FOG: 7 transmembrane receptor[R]
ENSG00000069849	239.633	61.2407	1.96826	0.00205168	0.0394602	up	ATP1B3	ATPase Na+/K+ transporting subunit beta 3 [Source:HGNC Symbol;Acc:HGNC:806]	GO:0006814;GO:0006813;GO:0005886;GO:0005890;GO:0005901;GO:0005737;GO:0030001;GO:0005391;GO:0042470;GO:0006811;GO:0016021;GO:0016020;GO:0006810;GO:0050900;GO:0010248;GO:0070062;GO:0034220;GO:1903278;GO:1903779;GO:0051117;GO:0050821;GO:0010107;GO:0006883;GO:0030007;GO:0036376;GO:0086009;GO:0001671;GO:0032781;GO:0072659;GO:1901018;GO:1903288	K01540-ko04024 cAMP signaling pathway;ko04022 cGMP - PKG signaling pathway;ko04911 Insulin secretion;ko04918 Thyroid hormone synthesis;ko04919 Thyroid hormone signaling pathway;ko04260 Cardiac muscle contraction;ko04261 Adrenergic signaling in cardiomyocytes;ko04970 Salivary secretion;ko04971 Gastric acid secretion;ko04972 Pancreatic secretion;ko04976 Bile secretion;ko04973 Carbohydrate digestion…	KOG3927-Na+/K+ ATPase, beta subunit[P]
ENSG00000138035	30.2688	9.21408	1.71592	0.000546718	0.0152171	up	PNPT1	polyribonucleotide nucleotidyltransferase 1 [Source:HGNC Symbol;Acc:HGNC:23166]	GO:0006396;GO:0003723;GO:0090503;GO:0006402;GO:0000175;GO:0004654;GO:0090305;GO:0005739;GO:0016787;GO:0016740;GO:0005829;GO:0016020;GO:0005737;GO:0006810;GO:0006397;GO:0003676;GO:0004527;GO:0004518;GO:0016779;GO:0005515;GO:0005758;GO:0035458;GO:0034599;GO:0061014;GO:2000772;GO:0006401;GO:0045926;GO:0051260;GO:0008266;GO:0070207;GO:0035198;GO:0071850;GO:0043631;GO:0034046;GO:0070584;GO:0035928;GO:…	K00962-ko00230 Purine metabolism;ko00240 Pyrimidine metabolism;ko03018 RNA degradation	KOG1067-Predicted RNA-binding polyribonucleotide nucleotidyltransferase[R]
ENSG00000172935	6.37197	15.7116	-1.30202	0.00200084	0.0386925	down	MRGPRF	MAS related GPR family member F [Source:HGNC Symbol;Acc:HGNC:24828]	GO:0007165;GO:0004871;GO:0005886;GO:0031965;GO:0007186;GO:0004930;GO:0016021;GO:0016020;GO:0070062	-	-
ENSG00000106034	1.55743	5.90792	-1.92348	0.000454459	0.0132144	down	CPED1	cadherin like and PC-esterase domain containing 1 [Source:HGNC Symbol;Acc:HGNC:26159]	GO:0005783	-	-
ENSG00000166265	3.19067	8.7383	-1.45349	0.000230938	0.00797283	down	CYYR1	cysteine and tyrosine rich 1 [Source:HGNC Symbol;Acc:HGNC:16274]	GO:0016021;GO:0016020;GO:0003674;GO:0008150	-	-
ENSG00000114861	14.3865	37.046	-1.36461	0.000405518	0.0121132	down	FOXP1	forkhead box P1 [Source:HGNC Symbol;Acc:HGNC:3823]	GO:0043565;GO:0006355;GO:0006351;GO:0003700;GO:0003677;GO:0005654;GO:0046872;GO:0005634;GO:0006357;GO:0005515;GO:0032496;GO:0000981;GO:0042116;GO:0045892;GO:0010595;GO:0042118;GO:0043621;GO:0030316;GO:0048661;GO:0035019;GO:0050681;GO:0050727;GO:0060766;GO:0032680;GO:1901509;GO:0036035;GO:0042117;GO:0061470;GO:0002903;GO:0035926;GO:0045655;GO:0050706;GO:0072619;GO:1900424;GO:1901256;GO:2001182;GO:…	-	KOG4385-Predicted forkhead transcription factor[K]
ENSG00000186847	6555.43	456.895	3.84275	9.85e-08	1.62e-05	up	KRT14	keratin 14 [Source:HGNC Symbol;Acc:HGNC:6416]	GO:0071944;GO:0045178;GO:0045095;GO:0005622;GO:0030855;GO:0010212;GO:0010043;GO:0005882;GO:0005515;GO:0005198;GO:0005737;GO:0005634;GO:0005829;GO:0070062;GO:0031424;GO:0005200;GO:0008544;GO:0070268;GO:1990254;GO:0007568;GO:0031581;GO:0042633;GO:0045110	-	-
ENSG00000196368	11.0521	0.844082	3.71079	3.29e-07	4.6e-05	up	NUDT11	nudix hydrolase 11 [Source:HGNC Symbol;Acc:HGNC:18011]	GO:0016787;GO:0005829;GO:0046872;GO:0005737;GO:0005634;GO:0043647;GO:0005622;GO:0000298;GO:0008486;GO:0034431;GO:0034432;GO:0050072;GO:0052840;GO:0052841;GO:0052842;GO:0052843;GO:0052844;GO:0052845;GO:0052846;GO:0052847;GO:0052848;GO:1901907;GO:1901909;GO:1901911;GO:0071543	-	KOG2839-Diadenosine and diphosphoinositol polyphosphate phosphohydrolase[T]
ENSG00000183722	14.7026	36.4873	-1.31132	0.00244156	0.04477	down	LHFP	lipoma HMGIC fusion partner [Source:HGNC Symbol;Acc:HGNC:6586]	GO:0016021;GO:0016020	-	KOG4026-Uncharacterized conserved protein[S]
ENSG00000196584	7.23188	1.14174	2.66313	0.000116928	0.00471552	up	XRCC2	X-ray repair cross complementing 2 [Source:HGNC Symbol;Acc:HGNC:12829]	GO:2000269;GO:0050769;GO:0043524;GO:0035264;GO:0022008;GO:0010332;GO:0010165;GO:0006974;GO:0001756;GO:0001701;GO:0000724;GO:0051321;GO:0005515;GO:0006281;GO:0003677;GO:0008094;GO:0005654;GO:0005524;GO:0043231;GO:0005737;GO:0005634;GO:0005856;GO:0005813;GO:0005815;GO:0006310;GO:0003690;GO:0006312;GO:0033063;GO:0003697;GO:0000400;GO:0004520;GO:0000150;GO:0000707;GO:0000731;GO:0000732;GO:0010212;GO:…	K10879-ko03440 Homologous recombination	KOG2859-DNA repair protein, member of the recA/RAD51 family[L]
ENSG00000198183	0.97493	223.212	-7.8389	0.00245677	0.0450146	down	BPIFA1	BPI fold containing family A member 1 [Source:HGNC Symbol;Acc:HGNC:15749]	GO:0005576;GO:0008289;GO:0005515;GO:0005615;GO:0002376;GO:0045087;GO:0042742;GO:0003674;GO:0019731;GO:0019730;GO:1900229;GO:0050891;GO:0050828;GO:1902305	-	-
ENSG00000177455	1.19212	7.34787	-2.62379	0.000375367	0.0114352	down	CD19	CD19 molecule [Source:HGNC Symbol;Acc:HGNC:1633]	GO:0005515;GO:0005622;GO:0016021;GO:0016020;GO:0050776;GO:0005886;GO:0050853;GO:0046854;GO:0070062;GO:0005887;GO:0043234;GO:0007166;GO:0046934;GO:0014066;GO:0048015;GO:0005057;GO:0006968;GO:0009897;GO:0030449;GO:0051281	K06465-ko04151 PI3K-Akt signaling pathway;ko04640 Hematopoietic cell lineage;ko04662 B cell receptor signaling pathway;ko05340 Primary immunodeficiency;ko05169 Epstein-Barr virus infection	-
ENSG00000101057	68.9312	12.015	2.52032	1.36e-05	0.000864824	up	MYBL2	MYB proto-oncogene like 2 [Source:HGNC Symbol;Acc:HGNC:7548]	GO:0031523;GO:0005634;GO:0090307;GO:0043525;GO:0005515;GO:0006355;GO:0006351;GO:0003677;GO:0006366;GO:0005654;GO:0000978;GO:0030154;GO:0003700;GO:0001077;GO:0045944;GO:0051726;GO:0006357;GO:0001135	K09421-ko05166 HTLV-I infection	KOG0048-Transcription factor, Myb superfamily[K]
ENSG00000174371	10.4707	2.15949	2.27759	0.000349904	0.0108841	up	EXO1	exonuclease 1 [Source:HGNC Symbol;Acc:HGNC:3511]	GO:0045190;GO:0016446;GO:0002455;GO:0003682;GO:0016604;GO:0005515;GO:0090305;GO:0006281;GO:0003677;GO:0003824;GO:0016787;GO:0005654;GO:0046872;GO:0005634;GO:0016788;GO:0004518;GO:0004519;GO:0090502;GO:0004527;GO:0006974;GO:0051321;GO:0002376;GO:0006310;GO:0035312;GO:0006298;GO:1901796;GO:0006260;GO:0000731;GO:0000732;GO:0090656;GO:0008409;GO:0048256;GO:0045145;GO:0004523;GO:0051908	K10746-ko03430 Mismatch repair	KOG2518-5'-3' exonuclease[L]
ENSG00000137547	86.7232	30.8052	1.49324	0.000682551	0.01767	up	MRPL15	mitochondrial ribosomal protein L15 [Source:HGNC Symbol;Acc:HGNC:14054]	GO:0005739;GO:0005515;GO:0005840;GO:0006412;GO:0003735;GO:0030529;GO:0003723;GO:0015934;GO:0005743;GO:0070125;GO:0070126;GO:0005762	K02876-ko03010 Ribosome	KOG0846-Mitochondrial/chloroplast ribosomal protein L15/L10[J]
ENSG00000131016	3.57519	17.089	-2.25698	0.000224483	0.00779891	down	AKAP12	A-kinase anchoring protein 12 [Source:HGNC Symbol;Acc:HGNC:370]	GO:0005515;GO:0005886;GO:0007165;GO:0006605;GO:0005829;GO:0016020;GO:0005737;GO:0005856;GO:0005925;GO:0005938;GO:0007186;GO:0030819;GO:0051018;GO:0008179;GO:0010739;GO:0090036	-	-
ENSG00000131015	22.2925	2.98065	2.90286	0.000132082	0.0051876	up	ULBP2	UL16 binding protein 2 [Source:HGNC Symbol;Acc:HGNC:14894]	GO:0005576;GO:0005886;GO:0016020;GO:0031225;GO:0003823;GO:0006501;GO:0009986;GO:0005615;GO:0030101;GO:0046658;GO:0042267;GO:0046703;GO:0019882	K07986-ko04650 Natural killer cell mediated cytotoxicity	-
ENSG00000108106	79.3367	23.5918	1.74971	0.000947601	0.0224773	up	UBE2S	ubiquitin conjugating enzyme E2 S [Source:HGNC Symbol;Acc:HGNC:17895]	GO:0051301;GO:0016567;GO:0016740;GO:0005524;GO:0000166;GO:0007049;GO:0005737;GO:0031625;GO:0005829;GO:0061631;GO:0061630;GO:0005654;GO:0004842;GO:0006464;GO:0070534;GO:0010458;GO:0010994;GO:0031145;GO:0070979;GO:1904668;GO:0005680;GO:0085020;GO:0035519;GO:0044314	K10583-ko04120 Ubiquitin mediated proteolysis	KOG0423-Ubiquitin-protein ligase[O]
ENSG00000127528	5.6767	27.9423	-2.29933	0.000193242	0.00694403	down	KLF2	Kruppel like factor 2 [Source:HGNC Symbol;Acc:HGNC:6347]	GO:0005634;GO:1901653;GO:0071409;GO:0071407;GO:0071356;GO:0071347;GO:0070301;GO:0060509;GO:0045944;GO:0045893;GO:0043249;GO:0040029;GO:0035264;GO:0034616;GO:0034101;GO:0032715;GO:0001701;GO:0000902;GO:0043565;GO:0003700;GO:0005515;GO:0006355;GO:0006351;GO:0003677;GO:0046872;GO:0003676;GO:0000790;GO:0000981;GO:0045429;GO:0051247;GO:0071499;GO:0036003;GO:0071498	K17845-ko04068 FoxO signaling pathway	KOG1721-FOG: Zn-finger[R]
ENSG00000105088	47.0982	7.33271	2.68325	0.000832829	0.0204708	up	OLFM2	olfactomedin 2 [Source:HGNC Symbol;Acc:HGNC:17189]	GO:0097060;GO:0032281;GO:0007626;GO:0007601;GO:0005576;GO:0005654;GO:0016020;GO:0005737;GO:0005634;GO:0030054;GO:0045202;GO:0005515;GO:0009306;GO:0051152	-	-
ENSG00000249751	8.57172	23.8862	-1.47852	0.00049846	0.0142608	down	ECSCR	endothelial cell surface expressed chemotaxis and apoptosis regulator [Source:HGNC Symbol;Acc:HGNC:35454]	GO:0005886;GO:0016021;GO:0016020;GO:0005737;GO:0006915;GO:0007275;GO:0030154;GO:0006935;GO:0001525;GO:0005829;GO:0016525;GO:1901800;GO:2000353	-	-
ENSG00000251381	57.2267	16.6156	1.78415	0.00103013	0.0238936	up	LINC00958	long intergenic non-protein coding RNA 958 [Source:HGNC Symbol;Acc:HGNC:48671]	-	-	-
ENSG00000121152	25.5309	5.96301	2.09813	0.00178664	0.0355791	up	NCAPH	non-SMC condensin I complex subunit H [Source:HGNC Symbol;Acc:HGNC:1112]	GO:0000796;GO:0045132;GO:0010032;GO:0005515;GO:0005694;GO:0051301;GO:0005829;GO:0005634;GO:0016020;GO:0005737;GO:0007049;GO:0003682;GO:0007076;GO:0030261;GO:0044547;GO:0072587;GO:2000373;GO:0000799	K06676-ko04111 Cell cycle - yeast	KOG2328-Chromosome condensation complex Condensin, subunit H[BD]
ENSG00000126878	7.08159	27.1789	-1.94034	0.000345122	0.0107981	down	AIF1L	allograft inflammatory factor 1 like [Source:HGNC Symbol;Acc:HGNC:28904]	GO:0005886;GO:0003779;GO:0051015;GO:0005509;GO:0046872;GO:0016020;GO:0005737;GO:0005856;GO:0042995;GO:0070062;GO:0005884;GO:0032587;GO:0015629;GO:0005925;GO:0043234	-	-
ENSG00000196139	279.148	53.7437	2.37686	0.00281166	0.0497015	up	AKR1C3	aldo-keto reductase family 1 member C3 [Source:HGNC Symbol;Acc:HGNC:386]	GO:0055114;GO:0016491;GO:0005737;GO:0005634;GO:0007186;GO:0042572;GO:0008202;GO:0005829;GO:0070062;GO:0008584;GO:0009267;GO:2000379;GO:0008284;GO:0001523;GO:0006693;GO:0019371;GO:0051897;GO:0070293;GO:0004745;GO:0047035;GO:0030216;GO:0005622;GO:0071277;GO:0010942;GO:0004033;GO:0044597;GO:0044598;GO:0001758;GO:0045550;GO:0047718;GO:0016488;GO:0016655;GO:0052650;GO:0000060;GO:0071276;GO:0042448;GO:…	K04119-ko00140 Steroid hormone biosynthesis;ko00590 Arachidonic acid metabolism;ko04913 Ovarian Steroidogenesis	KOG1577-Aldo/keto reductase family proteins[R]
ENSG00000172348	1.68245	10.2777	-2.61088	2.3e-06	0.000228211	down	RCAN2	regulator of calcineurin 2 [Source:HGNC Symbol;Acc:HGNC:3041]	GO:0050790;GO:0003676;GO:0019722;GO:0005737;GO:0005575;GO:0008597;GO:0070884;GO:0005622	K17903-ko04919 Thyroid hormone signaling pathway	KOG4019-Calcineurin-mediated signaling pathway inhibitor DSCR1[TR]
ENSG00000265787	0.077324	6.17321	-6.31896	1.38e-08	3.04e-06	down	CYP4F35P	cytochrome P450 family 4 subfamily F member 35, pseudogene [Source:HGNC Symbol;Acc:HGNC:39954]	-	-	-
ENSG00000138722	1.23879	15.8082	-3.67367	1.29e-07	1.97e-05	down	MMRN1	multimerin 1 [Source:HGNC Symbol;Acc:HGNC:7178]	GO:0005576;GO:0005509;GO:0007596;GO:0031012;GO:0005515;GO:0007155;GO:0002576;GO:0031093	-	-
ENSG00000119285	21.6564	7.58443	1.51368	0.00129719	0.0283148	up	HEATR1	HEAT repeat containing 1 [Source:HGNC Symbol;Acc:HGNC:25517]	GO:0005515;GO:0001650;GO:0030529;GO:0006355;GO:0006351;GO:0005739;GO:0016020;GO:0005634;GO:0003723;GO:0006364;GO:0005730;GO:0000462;GO:0032040;GO:0030515;GO:0042254;GO:0005654;GO:0030686;GO:0045943;GO:2000234;GO:0034455	K14550-ko03008 Ribosome biogenesis in eukaryotes	KOG1837-Uncharacterized conserved protein[S]
ENSG00000196739	27.0085	3.99979	2.75542	1.49e-09	4.79e-07	up	COL27A1	collagen type XXVII alpha 1 chain [Source:HGNC Symbol;Acc:HGNC:22986]	GO:0005583;GO:0030198;GO:0003431;GO:0005201;GO:0005581;GO:0005576;GO:0046872;GO:0005578;GO:0005788	K19721-ko04974 Protein digestion and absorption	KOG3544-Collagens (type IV and type XIII), and related proteins[W]
ENSG00000163431	1.98024	9.61187	-2.27914	5.6e-05	0.00263559	down	LMOD1	leiomodin 1 [Source:HGNC Symbol;Acc:HGNC:6647]	GO:0030017;GO:0005884;GO:0003779;GO:0005829;GO:0005737;GO:0005856;GO:0006936;GO:0030016;GO:0005523;GO:0051694;GO:0016020;GO:0030838;GO:0045010	-	KOG3735-Tropomodulin and leiomodulin[Z]
ENSG00000187775	12.688	0.800894	3.98571	8.48e-08	1.45e-05	up	DNAH17	dynein axonemal heavy chain 17 [Source:HGNC Symbol;Acc:HGNC:2946]	GO:0003777;GO:0007018;GO:0030286;GO:0005524;GO:0016887;GO:0000166;GO:0005737;GO:0005856;GO:0005874;GO:0003774;GO:0042995;GO:0005929;GO:0060285;GO:0005858	-	-
ENSG00000179144	10.4094	42.7152	-2.03686	5.37e-07	6.95e-05	down	GIMAP7	GTPase, IMAP family member 7 [Source:HGNC Symbol;Acc:HGNC:22404]	GO:0042803;GO:0005525;GO:0005794;GO:0005783;GO:0005829;GO:0000166;GO:0043231;GO:0005737;GO:0003924;GO:0005515;GO:0005811	-	-
ENSG00000147465	7.8028	0.906694	3.1053	4.62e-05	0.00226439	up	STAR	steroidogenic acute regulatory protein [Source:HGNC Symbol;Acc:HGNC:11359]	GO:0043025;GO:0043005;GO:0030061;GO:0005829;GO:0005758;GO:0005739;GO:0071872;GO:0071560;GO:0071549;GO:0071407;GO:0071378;GO:0071373;GO:0071372;GO:0071371;GO:0071346;GO:0071333;GO:0071320;GO:0071312;GO:0071276;GO:0071248;GO:0071236;GO:0071222;GO:0061370;GO:0060992;GO:0051412;GO:0050810;GO:0050769;GO:0048545;GO:0048168;GO:0046677;GO:0045471;GO:0044344;GO:0044321;GO:0044255;GO:0043627;GO:0043524;GO:…	K16931-ko04913 Ovarian Steroidogenesis;ko04925 Aldosterone synthesis and secretion	KOG3845-MLN, STAR and related lipid-binding proteins[I]
ENSG00000168003	189.703	50.6735	1.90444	0.000254282	0.00855042	up	SLC3A2	solute carrier family 3 member 2 [Source:HGNC Symbol;Acc:HGNC:11026]	GO:1902475;GO:0042470;GO:0035725;GO:0005886;GO:0005975;GO:0003824;GO:0005829;GO:0005634;GO:0016021;GO:0016020;GO:0006810;GO:0003723;GO:0006816;GO:0050900;GO:0005515;GO:0045296;GO:0070062;GO:0006865;GO:0016324;GO:0009986;GO:0016049;GO:0043330;GO:0003725;GO:0015175;GO:0005432;GO:0015827;GO:0060356	K06519-ko04150 mTOR signaling pathway;ko04974 Protein digestion and absorption	KOG0471-Alpha-amylase[G]
ENSG00000168005	29.8178	7.83149	1.92881	0.0010101	0.0235423	up	C11orf84	chromosome 11 open reading frame 84 [Source:HGNC Symbol;Acc:HGNC:25115]	-	-	-
ENSG00000162723	8.78453	0.149481	5.87693	2.7e-07	3.85e-05	up	SLAMF9	SLAM family member 9 [Source:HGNC Symbol;Acc:HGNC:18430]	GO:0016021;GO:0016020	-	-
ENSG00000025039	2.33454	9.67515	-2.05114	9.75e-06	0.000674888	down	RRAGD	Ras related GTP binding D [Source:HGNC Symbol;Acc:HGNC:19903]	GO:1904263;GO:0051020;GO:1990253;GO:0071233;GO:0019003;GO:0016241;GO:0005525;GO:0003924;GO:0046982;GO:0005515;GO:0005813;GO:0005654;GO:0000166;GO:0005737;GO:0005634;GO:0005764;GO:0071230;GO:0005829;GO:0032008;GO:0007050;GO:0034613	K16186-ko04150 mTOR signaling pathway	KOG3887-Predicted small GTPase involved in nuclear protein import[U]
ENSG00000164442	8.34477	44.1183	-2.40243	5.02e-08	9.3e-06	down	CITED2	Cbp/p300 interacting transactivator with Glu/Asp rich carboxy-terminal domain 2 [Source:HGNC Symbol;Acc:HGNC:1987]	GO:0019904;GO:0043234;GO:0005515;GO:0003700;GO:0006355;GO:0006351;GO:0006366;GO:0005634;GO:0007275;GO:0030154;GO:0003713;GO:0045893;GO:0003714;GO:0010628;GO:0007507;GO:0005654;GO:0003682;GO:0008283;GO:0043066;GO:0001666;GO:0045944;GO:0010629;GO:0000122;GO:0030511;GO:0045892;GO:0000790;GO:0003151;GO:0043627;GO:0001106;GO:0022409;GO:0030336;GO:0060412;GO:0045787;GO:0007368;GO:0007530;GO:0001889;GO:…	-	-
ENSG00000169184	10.4447	3.63626	1.52225	0.00217243	0.0412163	up	MN1	MN1 proto-oncogene, transcriptional regulator [Source:HGNC Symbol;Acc:HGNC:7180]	GO:0001957;GO:0006355;GO:0006351;GO:0007275;GO:0003674;GO:0008150;GO:0005575	-	-
ENSG00000123689	69.4171	6.6815	3.37705	2.81e-05	0.00153414	up	G0S2	G0/G1 switch 2 [Source:HGNC Symbol;Acc:HGNC:30229]	GO:0019216;GO:0005739;GO:0006915;GO:0005515;GO:0003674;GO:0097191;GO:2001238;GO:0005811	-	-
ENSG00000173621	40.9718	7.89299	2.37599	0.00020988	0.00738751	up	LRFN4	leucine rich repeat and fibronectin type III domain containing 4 [Source:HGNC Symbol;Acc:HGNC:28456]	GO:0009986;GO:0005515;GO:0016021;GO:0016020;GO:0005615;GO:0005886;GO:0007409;GO:0005578	-	KOG0619-FOG: Leucine rich repeat[R]
ENSG00000240038	2.09635	8.88228	-2.08305	0.0020099	0.0388054	down	AMY2B	amylase, alpha 2B (pancreatic) [Source:HGNC Symbol;Acc:HGNC:478]	GO:0016798;GO:0005576;GO:0008152;GO:0005975;GO:0003824;GO:0016787;GO:0046872;GO:0043169;GO:0070062;GO:0007586;GO:0004556	K01176-ko00500 Starch and sucrose metabolism;ko04973 Carbohydrate digestion and absorption	KOG2212-Alpha-amylase[G]
ENSG00000275216	34.3197	1.27519	4.75025	2.58e-05	0.00142412	up	AL161431.1	-	-	-	-
ENSG00000077152	39.3467	9.48782	2.0521	0.00099292	0.0232544	up	UBE2T	ubiquitin conjugating enzyme E2 T [Source:HGNC Symbol;Acc:HGNC:25009]	GO:0016567;GO:0016740;GO:0005730;GO:0005634;GO:0005524;GO:0000166;GO:0006281;GO:0006974;GO:0005737;GO:0061631;GO:0061630;GO:0005654;GO:0003682;GO:0031625;GO:0036297;GO:0004842;GO:0070534;GO:0070936;GO:0070979;GO:0051865;GO:0006513;GO:0085020;GO:0035519;GO:0044314	K13960-ko03460 Fanconi anemia pathway	KOG0417-Ubiquitin-protein ligase[O]
ENSG00000169252	1.42191	6.89966	-2.27869	0.000973502	0.0229111	down	ADRB2	adrenoceptor beta 2 [Source:HGNC Symbol;Acc:HGNC:286]	GO:0016324;GO:0016020;GO:0005634;GO:0071875;GO:0050873;GO:0045986;GO:0045944;GO:0045453;GO:0040015;GO:0031649;GO:0030501;GO:0009409;GO:0007189;GO:0002028;GO:0002025;GO:0002024;GO:0001993;GO:0019899;GO:0008179;GO:0004941;GO:0097746;GO:0005887;GO:0007165;GO:0004871;GO:0005515;GO:0005886;GO:0007186;GO:0004930;GO:0016021;GO:0006940;GO:0005768;GO:0004935;GO:0061024;GO:0010008;GO:0016579;GO:0007267;GO:…	K04142-ko04020 Calcium signaling pathway;ko04024 cAMP signaling pathway;ko04022 cGMP - PKG signaling pathway;ko04080 Neuroactive ligand-receptor interaction;ko04144 Endocytosis;ko04923 Regulation of lipolysis in adipocyte;ko04924 Renin secretion;ko04261 Adrenergic signaling in cardiomyocytes;ko04970 Salivary secretion	KOG3656-FOG: 7 transmembrane receptor[R]
ENSG00000169258	5.3489	0.619581	3.10988	5.51e-07	7.06e-05	up	GPRIN1	G protein regulated inducer of neurite outgrowth 1 [Source:HGNC Symbol;Acc:HGNC:24835]	GO:0005886;GO:0031175;GO:0051219;GO:0016020;GO:0042995;GO:0030426	-	-
ENSG00000189129	6.44004	33.3409	-2.37215	4.24e-07	5.67e-05	down	PLAC9	placenta specific 9 [Source:HGNC Symbol;Acc:HGNC:19255]	GO:0005576;GO:0005515	-	-
ENSG00000136999	21.8597	2.92916	2.89972	7.34e-06	0.000554319	up	NOV	nephroblastoma overexpressed [Source:HGNC Symbol;Acc:HGNC:7885]	GO:0043025;GO:0030425;GO:0031012;GO:0030424;GO:0005737;GO:0005921;GO:0005615;GO:1990523;GO:0005576;GO:1904057;GO:0060392;GO:0048659;GO:0050728;GO:0046676;GO:0010468;GO:0044342;GO:0002062;GO:0001558;GO:0005520;GO:0008083;GO:0043231;GO:0030054;GO:0005515;GO:0030308;GO:0001525;GO:0005112;GO:0045747;GO:0060326;GO:0005178;GO:0042347;GO:0035767;GO:0033627;GO:0010832;GO:0071603;GO:0010761;GO:0014909;GO:…	-	-
ENSG00000258168	8.34354	0.87886	3.24695	0.000362361	0.011142	up	AC025569.1	-	-	-	-
ENSG00000013810	39.7594	15.0837	1.3983	0.00181585	0.036012	up	TACC3	transforming acidic coiled-coil containing protein 3 [Source:HGNC Symbol;Acc:HGNC:11524]	GO:0005515;GO:0051301;GO:0005737;GO:0007049;GO:0005856;GO:0000922;GO:0005815;GO:0005819;GO:0008283;GO:0021987;GO:0015630;GO:0060236;GO:0007091;GO:1902850	K14283-ko03013 RNA transport	-
ENSG00000167754	86.5328	5.90442	3.87338	0.0002009	0.00717637	up	KLK5	kallikrein related peptidase 5 [Source:HGNC Symbol;Acc:HGNC:6366]	GO:0004252;GO:0005576;GO:0006508;GO:0008233;GO:0005515;GO:0016787;GO:0005615;GO:0008236;GO:0005829;GO:0008544;GO:0070268;GO:0045745;GO:0004175;GO:0002803;GO:0097209	-	KOG3627-Trypsin[E]
ENSG00000167755	103.701	11.9724	3.11464	3e-05	0.001604	up	KLK6	kallikrein related peptidase 6 [Source:HGNC Symbol;Acc:HGNC:6367]	GO:0010975;GO:0008233;GO:0016540;GO:0004252;GO:0005576;GO:0006508;GO:0005739;GO:0016787;GO:0043231;GO:0005783;GO:0005737;GO:0005634;GO:0005615;GO:0008236;GO:0005730;GO:0005515;GO:0030574;GO:0045595;GO:0009611;GO:0016485;GO:0042552;GO:0007417;GO:0045745;GO:0042246;GO:0042982;GO:0042445;GO:0070997	-	KOG3627-Trypsin[E]
ENSG00000135451	27.0689	5.75098	2.23475	0.000353085	0.0109424	up	TROAP	trophinin associated protein [Source:HGNC Symbol;Acc:HGNC:12327]	GO:0005515;GO:0007155;GO:0005737	-	-
ENSG00000135454	8.21563	0.99985	3.03859	0.000191858	0.00691493	up	B4GALNT1	beta-1,4-N-acetyl-galactosaminyltransferase 1 [Source:HGNC Symbol;Acc:HGNC:4117]	GO:0005886;GO:0019915;GO:0007283;GO:0006687;GO:0001574;GO:0008376;GO:0003947;GO:0016758;GO:0006629;GO:0030173;GO:0005794;GO:0016757;GO:0016740;GO:0016021;GO:0016020;GO:0000139;GO:0006665;GO:0005975;GO:0030259	K00725-ko00604 Glycosphingolipid biosynthesis - ganglio series	-
ENSG00000073111	51.1717	7.70102	2.73223	2.03e-06	0.000209238	up	MCM2	minichromosome maintenance complex component 2 [Source:HGNC Symbol;Acc:HGNC:6944]	GO:0005664;GO:0005634;GO:0071353;GO:0006334;GO:0006268;GO:0042393;GO:0019899;GO:0003688;GO:0006270;GO:0005515;GO:0015630;GO:0003677;GO:0004386;GO:0016787;GO:0005654;GO:0005829;GO:0005524;GO:0000166;GO:0046872;GO:0005737;GO:0006915;GO:0007049;GO:0006260;GO:0003678;GO:0042555;GO:0000784;GO:0000785;GO:0000082;GO:0090102;GO:0032508	K02540-ko03030 DNA replication;ko04110 Cell cycle;ko04111 Cell cycle - yeast;ko04113 Meiosis - yeast	KOG0477-DNA replication licensing factor, MCM2 component[L]
ENSG00000187955	4.02241	44.5338	-3.46877	2.79e-08	5.41e-06	down	COL14A1	collagen type XIV alpha 1 chain [Source:HGNC Symbol;Acc:HGNC:2191]	GO:0005581;GO:0005576;GO:0007155;GO:0003723;GO:0005578;GO:0070062;GO:0031012;GO:0030674;GO:0005615;GO:0005788;GO:0030199;GO:0016337;GO:0005518;GO:0005201;GO:0030198;GO:0005596	K08133-ko04974 Protein digestion and absorption	KOG1217-Fibrillins and related proteins containing Ca2+-binding EGF-like domains[T]
ENSG00000164930	52.4532	19.3608	1.43789	0.0020918	0.0400392	up	FZD6	frizzled class receptor 6 [Source:HGNC Symbol;Acc:HGNC:4044]	GO:0007165;GO:0004871;GO:0005515;GO:0005886;GO:0016020;GO:0016021;GO:0004888;GO:0004930;GO:0007166;GO:0007186;GO:0007275;GO:0016055;GO:0030659;GO:0031410;GO:0042813;GO:0017147;GO:0031625;GO:0016324;GO:0009986;GO:0043433;GO:0060071;GO:0035567;GO:0007223;GO:0090090;GO:1904693;GO:0005887;GO:0045177;GO:0016327;GO:0048105;GO:0042472;GO:0035880;GO:0033278;GO:0030901;GO:0030168;GO:0001942;GO:0001843;GO:…	K02376-ko04310 Wnt signaling pathway;ko04390 Hippo signaling pathway;ko04150 mTOR signaling pathway;ko04550 Signaling pathways regulating pluripotency of stem cells;ko04916 Melanogenesis;ko05200 Pathways in cancer;ko05205 Proteoglycans in cancer;ko05217 Basal cell carcinoma;ko05224 Breast cancer;ko05166 HTLV-I infection	KOG3577-Smoothened and related G-protein-coupled receptors[T]
ENSG00000170891	1.21179	5.82507	-2.26513	0.000247999	0.00839329	down	CYTL1	cytokine like 1 [Source:HGNC Symbol;Acc:HGNC:24435]	GO:1990079;GO:0051091;GO:0050650;GO:0048839;GO:0045944;GO:0002062;GO:0005576;GO:0007165;GO:0005615;GO:0005102	-	-
ENSG00000170271	3.89169	13.2863	-1.77147	0.000206673	0.00730671	down	FAXDC2	fatty acid hydroxylase domain containing 2 [Source:HGNC Symbol;Acc:HGNC:1334]	GO:0005506;GO:0055114;GO:0016491;GO:0016021;GO:0016020;GO:0008610;GO:0005789;GO:0006629	K07750-ko00100 Steroid biosynthesis	KOG0873-C-4 sterol methyl oxidase[I]
ENSG00000103460	0.0332403	6.99467	-7.71718	1.2e-11	6.7e-09	down	TOX3	TOX high mobility group box family member 3 [Source:HGNC Symbol;Acc:HGNC:11972]	GO:0042803;GO:0006355;GO:0006351;GO:0003677;GO:0005634;GO:0006915;GO:0045893;GO:0005515;GO:0003682;GO:0043524;GO:0034056;GO:0051219	-	KOG0381-HMG box-containing protein[R]
ENSG00000126467	8.3489	0.327387	4.67252	0.00195227	0.0380019	up	TSKS	testis specific serine kinase substrate [Source:HGNC Symbol;Acc:HGNC:30719]	GO:0005814;GO:0019901;GO:0005515;GO:0005737;GO:0005856;GO:0010923;GO:0001669	-	-
ENSG00000138646	15.7534	2.15021	2.87311	0.000540425	0.0150768	up	HERC5	HECT and RLD domain containing E3 ubiquitin protein ligase 5 [Source:HGNC Symbol;Acc:HGNC:24368]	GO:0004842;GO:0016740;GO:0005737;GO:0003723;GO:0048471;GO:0002376;GO:0045087;GO:0051607;GO:0005515;GO:0005829;GO:0000209;GO:0032480;GO:0000079;GO:0032020;GO:0050688;GO:0042296;GO:0016567	-	KOG0941-E3 ubiquitin protein ligase[O]
ENSG00000149948	19.292	1.10155	4.1304	2.83e-05	0.00153698	up	HMGA2	high mobility group AT-hook 2 [Source:HGNC Symbol;Acc:HGNC:5009]	GO:0005515;GO:0000785;GO:0051301;GO:0006355;GO:0006351;GO:0003677;GO:0006366;GO:0005634;GO:0007049;GO:0045893;GO:0003906;GO:0001047;GO:0000122;GO:0045944;GO:0045444;GO:0010628;GO:0040008;GO:2000036;GO:0005654;GO:0009615;GO:0048863;GO:0043065;GO:0006284;GO:0030261;GO:0043066;GO:0007275;GO:0008134;GO:0045892;GO:0007095;GO:0006325;GO:0002062;GO:0001078;GO:0001077;GO:0008301;GO:0000228;GO:0071158;GO:…	K09283-ko05202 Transcriptional misregulation in cancers;ko05206 MicroRNAs in cancer	-
ENSG00000101412	12.6614	2.62705	2.26892	0.000370407	0.0113315	up	E2F1	E2F transcription factor 1 [Source:HGNC Symbol;Acc:HGNC:3113]	GO:0005737;GO:0005667;GO:0005634;GO:0000790;GO:1990090;GO:1990086;GO:0072332;GO:0071466;GO:0071456;GO:0071398;GO:0070345;GO:0051726;GO:0045944;GO:0045893;GO:0045599;GO:0043276;GO:0030900;GO:0007283;GO:0006355;GO:0006351;GO:0044212;GO:0043565;GO:0019901;GO:0008134;GO:0003700;GO:0005515;GO:0005813;GO:0003677;GO:0046983;GO:0005654;GO:0006915;GO:0007049;GO:0005739;GO:0001047;GO:0006977;GO:0000122;GO:…	K17454-ko04110 Cell cycle;ko05200 Pathways in cancer;ko05206 MicroRNAs in cancer;ko05212 Pancreatic cancer;ko05214 Glioma;ko05220 Chronic myeloid leukemia;ko05218 Melanoma;ko05219 Bladder cancer;ko05215 Prostate cancer;ko05224 Breast cancer;ko05222 Small cell lung cancer;ko05223 Non-small cell lung cancer;ko05166 HTLV-I infection;ko05161 Hepatitis B;ko01522 Endocrine resistance	KOG2577-Transcription factor E2F/dimerization partner (TDP)[K]
ENSG00000149554	16.6306	3.91817	2.08559	0.000319636	0.0102199	up	CHEK1	checkpoint kinase 1 [Source:HGNC Symbol;Acc:HGNC:1925]	GO:0005657;GO:0005634;GO:0000785;GO:2000615;GO:1902742;GO:0048096;GO:0042127;GO:0010767;GO:0010468;GO:0007093;GO:0006997;GO:0006974;GO:0006468;GO:0006281;GO:0001833;GO:0000086;GO:0000077;GO:0035402;GO:0004672;GO:0005654;GO:0005524;GO:0043231;GO:0035407;GO:0005737;GO:0045787;GO:0019904;GO:0043234;GO:0005515;GO:0016310;GO:0016301;GO:0016740;GO:0004674;GO:0000166;GO:0007049;GO:0005615;GO:0005856;GO:…	K02216-ko04110 Cell cycle;ko04111 Cell cycle - yeast;ko04113 Meiosis - yeast;ko04115 p53 signaling pathway;ko05203 Viral carcinogenesis;ko05166 HTLV-I infection	KOG0590-Checkpoint kinase and related serine/threonine protein kinases[D]
ENSG00000183580	1.53476	5.73762	-1.90244	1.47e-05	0.000917062	down	FBXL7	F-box and leucine rich repeat protein 7 [Source:HGNC Symbol;Acc:HGNC:13604]	GO:0019005;GO:0005813;GO:0031146;GO:0016567;GO:0008283;GO:0000278;GO:0000086;GO:0051301;GO:0005737;GO:0006511;GO:0007049;GO:0005856;GO:0005815;GO:0005829;GO:0000209;GO:0010972;GO:0004842;GO:0000151;GO:0043687;GO:0010265	-	-
ENSG00000179477	38.3394	0.759492	5.65765	4.21e-08	7.92e-06	up	ALOX12B	arachidonate 12-lipoxygenase, 12R type [Source:HGNC Symbol;Acc:HGNC:430]	GO:0061436;GO:0046513;GO:0043651;GO:0019369;GO:0006497;GO:1990136;GO:0004052;GO:0003824;GO:0005515;GO:0005506;GO:0006631;GO:0006629;GO:0046872;GO:0055114;GO:0016491;GO:0005737;GO:0051213;GO:0006665;GO:0016702;GO:0005829;GO:0010628;GO:0019372;GO:0051122;GO:0043410;GO:0070257	K08021-ko00590 Arachidonic acid metabolism;ko04726 Serotonergic synapse	-
ENSG00000283294	0.103054	8.55909	-6.37598	3.82e-10	1.56e-07	down	AP005212.5	-	-	-	-
ENSG00000175792	59.2336	20.4	1.53785	0.00139578	0.029751	up	RUVBL1	RuvB like AAA ATPase 1 [Source:HGNC Symbol;Acc:HGNC:10474]	GO:0006355;GO:0006351;GO:0032508;GO:0004386;GO:0016787;GO:0005524;GO:0000166;GO:0005634;GO:0006281;GO:0006974;GO:0006310;GO:0003678;GO:0043141;GO:0005654;GO:0005829;GO:0030529;GO:0051117;GO:0043531;GO:0001094;GO:0005515;GO:0016569;GO:0051301;GO:0016020;GO:0005737;GO:0007049;GO:0005856;GO:0005815;GO:0045296;GO:0070062;GO:0040008;GO:0016579;GO:0034080;GO:0016887;GO:1903146;GO:0043967;GO:1904837;GO:…	K04499-ko04310 Wnt signaling pathway	KOG1942-DNA helicase, TBP-interacting protein[L]
ENSG00000133106	23.1741	6.51557	1.83055	0.001376	0.0295	up	EPSTI1	epithelial stromal interaction 1 [Source:HGNC Symbol;Acc:HGNC:16465]	-	-	-
ENSG00000156535	25.5252	5.87732	2.11869	0.000335322	0.010587	up	CD109	CD109 molecule [Source:HGNC Symbol;Acc:HGNC:21685]	GO:0005615;GO:0072675;GO:0045616;GO:0010839;GO:0001942;GO:0001933;GO:0005886;GO:0010951;GO:0005576;GO:0016020;GO:0031225;GO:0030414;GO:0010466;GO:0004866;GO:0006501;GO:0004867;GO:0002576;GO:0009986;GO:0030512;GO:0031092;GO:0061045;GO:0050431	-	-
ENSG00000111247	12.6917	3.35745	1.91845	6.83e-05	0.0030632	up	RAD51AP1	RAD51 associated protein 1 [Source:HGNC Symbol;Acc:HGNC:16956]	GO:0006281;GO:0003723;GO:0005634;GO:0003690;GO:0003697;GO:0005515;GO:0003677;GO:0006974;GO:0006310;GO:0005654;GO:0010569;GO:0000790;GO:0000724;GO:0000731;GO:0000732;GO:0071479;GO:0036297	-	-
ENSG00000104783	7.3681	30.0309	-2.02708	1.07e-05	0.000716558	down	KCNN4	potassium calcium-activated channel subfamily N member 4 [Source:HGNC Symbol;Acc:HGNC:6293]	GO:0071805;GO:0006813;GO:0016021;GO:0016286;GO:0050714;GO:0046541;GO:0045332;GO:0006884;GO:0015269;GO:0005267;GO:0005515;GO:0005886;GO:0006811;GO:0016020;GO:0006810;GO:0002376;GO:0005516;GO:0008076;GO:0006952;GO:0019903;GO:0006816;GO:0030322;GO:0050862;GO:0031982;GO:0043025	K04945-ko04911 Insulin secretion;ko04970 Salivary secretion;ko04974 Protein digestion and absorption	KOG3684-Ca2+-activated K+ channel proteins (intermediate/small conductance classes)[P]
ENSG00000150630	2.5145	8.56794	-1.76868	2.52e-05	0.00139713	down	VEGFC	vascular endothelial growth factor C [Source:HGNC Symbol;Acc:HGNC:12682]	GO:0005615;GO:1901492;GO:0050731;GO:0050714;GO:0050679;GO:0048010;GO:0045776;GO:0045766;GO:0043536;GO:0042493;GO:0031954;GO:0030947;GO:0016331;GO:0009887;GO:0008285;GO:0008284;GO:0002052;GO:0001954;GO:0001525;GO:0043185;GO:0005576;GO:0005515;GO:0008083;GO:0016020;GO:0007275;GO:0030154;GO:0050918;GO:0007165;GO:0002576;GO:0031093;GO:0051781;GO:0042056;GO:0001666;GO:0001938;GO:0050930;GO:0060754;GO:…	K05449-ko04014 Ras signaling pathway;ko04015 Rap1 signaling pathway;ko04151 PI3K-Akt signaling pathway;ko04060 Cytokine-cytokine receptor interaction;ko04510 Focal adhesion;ko05200 Pathways in cancer;ko04933 AGE-RAGE signaling pathway in diabetic complications	-
ENSG00000211445	12.4828	56.6329	-2.18169	1.31e-06	0.000144831	down	GPX3	glutathione peroxidase 3 [Source:HGNC Symbol;Acc:HGNC:4555]	GO:0055114;GO:0016491;GO:0098869;GO:0004601;GO:0004602;GO:0006979;GO:0005615;GO:0042744;GO:0034599;GO:0005576;GO:0005515;GO:0070062;GO:0008134;GO:0051289;GO:0008430;GO:0006982	-	KOG1651-Glutathione peroxidase[O]
ENSG00000156587	223.505	51.2893	2.12358	1.97e-05	0.00114955	up	UBE2L6	ubiquitin conjugating enzyme E2 L6 [Source:HGNC Symbol;Acc:HGNC:12490]	GO:0005524;GO:0000166;GO:0032020;GO:0019941;GO:0042296;GO:0019787;GO:0005515;GO:0016567;GO:0016740;GO:0005829;GO:0044267;GO:0005654;GO:0004842;GO:0006464;GO:0043130;GO:0019985;GO:0032480	K04553-ko04120 Ubiquitin mediated proteolysis;ko05012 Parkinson's disease	KOG0422-Ubiquitin-protein ligase[O]
ENSG00000078081	48.4664	4.69084	3.36906	1.56e-05	0.000963776	up	LAMP3	lysosomal associated membrane protein 3 [Source:HGNC Symbol;Acc:HGNC:14582]	GO:0097233;GO:0005765;GO:0005764;GO:0005634;GO:0016020;GO:0043231;GO:0016021;GO:0030659;GO:0031410;GO:0002376;GO:0002250;GO:0048471;GO:0005886;GO:0005769;GO:0031982;GO:0010628;GO:0010506;GO:0043154;GO:0035455;GO:1901799;GO:1903900	K06562-ko04142 Lysosome	KOG4818-Lysosomal-associated membrane protein[R]
ENSG00000171208	10.8911	1.65667	2.71678	0.000217286	0.00761483	up	NETO2	neuropilin and tolloid like 2 [Source:HGNC Symbol;Acc:HGNC:14644]	GO:0045202;GO:0014069;GO:0035255;GO:0016021;GO:0016020;GO:2000312	-	-
ENSG00000172156	5.44254	0.578992	3.23266	0.00284139	0.0498975	up	CCL11	C-C motif chemokine ligand 11 [Source:HGNC Symbol;Acc:HGNC:10610]	GO:0005615;GO:0070670;GO:0070371;GO:0060763;GO:0060444;GO:0048245;GO:0045766;GO:0035962;GO:0007015;GO:0002551;GO:0002544;GO:0046983;GO:0008009;GO:0048018;GO:0031728;GO:0006955;GO:0005576;GO:0005515;GO:0005623;GO:0005622;GO:0005125;GO:0006954;GO:0006935;GO:2000273;GO:0007186;GO:0048020;GO:0002548;GO:0030593;GO:0048247;GO:0070098;GO:0070374;GO:0071346;GO:0071347;GO:0071356;GO:0007010;GO:0008360;GO:…	K16597-ko04060 Cytokine-cytokine receptor interaction;ko04062 Chemokine signaling pathway;ko05310 Asthma	-
ENSG00000173207	139.483	39.2777	1.8283	0.00181859	0.0360366	up	CKS1B	CDC28 protein kinase regulatory subunit 1B [Source:HGNC Symbol;Acc:HGNC:19083]	GO:0045859;GO:0051301;GO:0016310;GO:0016301;GO:0007049;GO:0016538;GO:0044772;GO:0008283;GO:0006355;GO:0005515;GO:0005654;GO:0019901;GO:0019005;GO:0043130;GO:0045893;GO:0042393;GO:0007346;GO:0045737;GO:0000307;GO:0061575	K02219-ko04111 Cell cycle - yeast;ko05200 Pathways in cancer;ko05222 Small cell lung cancer	KOG3484-Cyclin-dependent protein kinase CDC28, regulatory subunit CKS1, and related proteins[D]
ENSG00000116194	0.296351	11.3681	-5.26154	1.38e-11	7.55e-09	down	ANGPTL1	angiopoietin like 1 [Source:HGNC Symbol;Acc:HGNC:489]	GO:0007169;GO:0005102;GO:0005576;GO:0070062;GO:0005615	-	KOG2579-Ficolin and related extracellular proteins[R]
ENSG00000185745	274.024	8.54197	5.00359	2.76e-08	5.41e-06	up	IFIT1	interferon induced protein with tetratricopeptide repeats 1 [Source:HGNC Symbol;Acc:HGNC:5407]	GO:0005515;GO:0009615;GO:0005829;GO:0005737;GO:0003723;GO:0002376;GO:0045087;GO:0051607;GO:0045071;GO:0050688;GO:0016032;GO:0045070;GO:0032091;GO:0060337;GO:0071360;GO:0019060;GO:0050689;GO:0051097;GO:0071357;GO:0043657	K14217-ko05160 Hepatitis C;ko05168 Herpes simplex infection	KOG1124-FOG: TPR repeat[R]
ENSG00000169442	37.5738	123.016	-1.71104	0.000856239	0.0208652	down	CD52	CD52 molecule [Source:HGNC Symbol;Acc:HGNC:1804]	GO:0005886;GO:0016021;GO:0016020;GO:0031225;GO:0005576;GO:0006501;GO:0005887;GO:0007204;GO:0045730	-	-
ENSG00000139597	4.11077	11.3675	-1.46744	0.00206299	0.0396081	down	N4BP2L1	NEDD4 binding protein 2 like 1 [Source:HGNC Symbol;Acc:HGNC:25037]	-	-	KOG2401-Predicted MutS-related protein involved in mismatch repair[L]
ENSG00000025708	464.557	61.9032	2.90777	7.53e-06	0.00055637	up	TYMP	thymidine phosphorylase [Source:HGNC Symbol;Acc:HGNC:3148]	GO:0016757;GO:0008152;GO:0016763;GO:0004645;GO:0006206;GO:0006213;GO:1905333;GO:0051969;GO:0031641;GO:0000002;GO:0009032;GO:0042803;GO:0008083;GO:0016740;GO:0007275;GO:0030154;GO:0006935;GO:0005829;GO:0016154;GO:0043097;GO:0001525;GO:0046135	K00758-ko00240 Pyrimidine metabolism;ko00983 Drug metabolism - other enzymes;ko05219 Bladder cancer	-
ENSG00000175084	0.846453	7.81444	-3.20664	0.00077768	0.0192826	down	DES	desmin [Source:HGNC Symbol;Acc:HGNC:2770]	GO:0043292;GO:0042383;GO:0031594;GO:0030018;GO:0005916;GO:0005911;GO:0005882;GO:0005856;GO:0005737;GO:0097512;GO:0005515;GO:0005886;GO:0045111;GO:0005198;GO:0016020;GO:0042802;GO:0005829;GO:0070062;GO:0006936;GO:0005200;GO:0007010;GO:0030049;GO:0045109;GO:0008016;GO:0008092;GO:0014704	K07610-ko05410 Hypertrophic cardiomyopathy (HCM);ko05412 Arrhythmogenic right ventricular cardiomyopathy (ARVC);ko05414 Dilated cardiomyopathy (DCM)	-
ENSG00000144908	1.2125	22.1256	-4.18967	3.83e-08	7.32e-06	down	ALDH1L1	aldehyde dehydrogenase 1 family member L1 [Source:HGNC Symbol;Acc:HGNC:3978]	GO:0005739;GO:0006730;GO:0009058;GO:0008152;GO:0003824;GO:0055114;GO:0016491;GO:0005829;GO:0005737;GO:0016742;GO:0070062;GO:0004029;GO:0016155;GO:0009258;GO:0046655	K00289-ko00670 One carbon pool by folate	KOG2450-Aldehyde dehydrogenase[C]
ENSG00000166292	0.220392	5.50867	-4.64356	9.71e-07	0.0001146	down	TMEM100	transmembrane protein 100 [Source:HGNC Symbol;Acc:HGNC:25607]	GO:0005515;GO:0005886;GO:0005783;GO:0016021;GO:0016020;GO:0005737;GO:0007275;GO:0048471;GO:0030154;GO:0003674;GO:0043204;GO:0030509;GO:0051930;GO:2001214;GO:0045603;GO:0071773;GO:0060842;GO:0050848;GO:0043491;GO:0007219;GO:0003198;GO:0003197;GO:0001701;GO:0001570;GO:0001525	-	-
ENSG00000249992	16.4817	1.22199	3.75355	1.68e-07	2.52e-05	up	TMEM158	transmembrane protein 158 (gene/pseudogene) [Source:HGNC Symbol;Acc:HGNC:30293]	GO:0042277;GO:0016021;GO:0016020	-	-
ENSG00000146410	6.46315	0.868331	2.89592	1.01e-05	0.000687452	up	MTFR2	mitochondrial fission regulator 2 [Source:HGNC Symbol;Acc:HGNC:21115]	GO:0005515;GO:0005739;GO:0009060;GO:0000266;GO:0007005	-	-
ENSG00000021574	6.99346	2.18658	1.67733	0.00238147	0.0438686	up	SPAST	spastin [Source:HGNC Symbol;Acc:HGNC:11233]	GO:0008152;GO:0003824;GO:1904115;GO:0051301;GO:0016787;GO:0005789;GO:0005783;GO:0005654;GO:0005829;GO:0005524;GO:0000166;GO:0016021;GO:0016020;GO:0005737;GO:0005634;GO:0007275;GO:0007049;GO:0048471;GO:0007399;GO:0030154;GO:0005856;GO:0005874;GO:0008017;GO:0008568;GO:0051013;GO:0005813;GO:0005815;GO:0005819;GO:0030496;GO:0005515;GO:0005768;GO:0007409;GO:0015630;GO:0070062;GO:0031122;GO:0043014;GO:…	-	KOG0740-AAA+-type ATPase[O]
ENSG00000100364	107.39	35.3256	1.60407	0.002438	0.0447387	up	KIAA0930	KIAA0930 [Source:HGNC Symbol;Acc:HGNC:1314]	-	-	KOG2465-Uncharacterized conserved protein[S]
ENSG00000154175	4.29131	27.3252	-2.67074	1.27e-07	1.95e-05	down	ABI3BP	ABI family member 3 binding protein [Source:HGNC Symbol;Acc:HGNC:17265]	GO:0005614;GO:0005578;GO:0030198;GO:0010811;GO:0008201;GO:0005539;GO:0005518;GO:0005576;GO:0031012;GO:0005615	-	-
ENSG00000137574	26.8059	8.723	1.61965	0.00106715	0.0245628	up	TGS1	trimethylguanosine synthase 1 [Source:HGNC Symbol;Acc:HGNC:17843]	GO:0019216;GO:0005515;GO:0006355;GO:0006351;GO:0032259;GO:0001510;GO:0016740;GO:0008168;GO:0005829;GO:0005634;GO:0005737;GO:0005615;GO:0005730;GO:0005654;GO:0000387;GO:0015030;GO:0008173;GO:0071164;GO:0009452;GO:0022613;GO:0036261;GO:0071167;GO:0030532	K14292-ko03013 RNA transport	KOG2730-Methylase[R]
ENSG00000275778	0.573575	6.31994	-3.46186	6.67e-06	0.000518021	down	AC018630.6	-	-	-	-
ENSG00000126218	0.749275	7.42171	-3.30818	6.1e-05	0.00283137	down	F10	coagulation factor X [Source:HGNC Symbol;Acc:HGNC:3528]	GO:0004252;GO:0006508;GO:0005576;GO:0005509;GO:0008233;GO:0016787;GO:0008236;GO:0007596;GO:0005886;GO:0005515;GO:0051897;GO:0030335;GO:0007599;GO:0006888;GO:0005796;GO:0005788;GO:0005543;GO:0007597;GO:0006465;GO:0017187;GO:0007598;GO:0031233	K01314-ko04610 Complement and coagulation cascades	-
ENSG00000148735	1.14862	19.4988	-4.08541	1.12e-06	0.000127991	down	PLEKHS1	pleckstrin homology domain containing S1 [Source:HGNC Symbol;Acc:HGNC:26285]	GO:0005515	-	-
ENSG00000117407	21.3071	0.858265	4.63377	5.22e-08	9.6e-06	up	ARTN	artemin [Source:HGNC Symbol;Acc:HGNC:727]	GO:0005576;GO:0043547;GO:0008083;GO:0005622;GO:0000165;GO:0007165;GO:0005102;GO:0007411;GO:0005088;GO:0007405;GO:0005615;GO:0097021;GO:0061146;GO:0050930;GO:0007422	-	-
ENSG00000160957	30.9544	8.13591	1.92777	0.0024756	0.0450528	up	RECQL4	RecQ like helicase 4 [Source:HGNC Symbol;Acc:HGNC:9949]	GO:0008026;GO:0005524;GO:0003676;GO:0006310	-	-
ENSG00000142684	76.1777	26.7459	1.51005	0.00169723	0.0341767	up	ZNF593	zinc finger protein 593 [Source:HGNC Symbol;Acc:HGNC:30943]	GO:0008270;GO:0005515;GO:0006355;GO:0006351;GO:0003677;GO:0005730;GO:0005634;GO:0046872;GO:0003676;GO:0030687;GO:0045944;GO:0043023;GO:0000055;GO:1903026	-	KOG3408-U1-like Zn-finger-containing protein, probabl erole in RNA processing/splicing[A]
ENSG00000149451	4.35336	18.7539	-2.10699	0.000187587	0.00682818	down	ADAM33	ADAM metallopeptidase domain 33 [Source:HGNC Symbol;Acc:HGNC:15478]	GO:0006508;GO:0008233;GO:0008270;GO:0016787;GO:0046872;GO:0016021;GO:0016020;GO:0004222;GO:0008237;GO:0005515	-	KOG3607-Meltrins, fertilins and related Zn-dependent metalloproteinases of the ADAMs family[O]
ENSG00000157613	5.13663	56.8736	-3.46886	4.33e-06	0.000368985	down	CREB3L1	cAMP responsive element binding protein 3 like 1 [Source:HGNC Symbol;Acc:HGNC:18856]	GO:1990440;GO:1902236;GO:0044212;GO:0005515;GO:0043565;GO:0006355;GO:0006351;GO:0003700;GO:0003677;GO:0006366;GO:0005789;GO:0005783;GO:0016021;GO:0016020;GO:0005634;GO:0007275;GO:0045944;GO:0035497;GO:0030968;GO:0006986;GO:0001649;GO:0046332;GO:0032967;GO:0001077;GO:0003682;GO:0070278	K09048-ko04668 TNF signaling pathway;ko04024 cAMP signaling pathway;ko04022 cGMP - PKG signaling pathway;ko04151 PI3K-Akt signaling pathway;ko04152 AMPK signaling pathway;ko04911 Insulin secretion;ko04922 Glucagon signaling pathway;ko04915 Estrogen signaling pathway;ko04918 Thyroid hormone synthesis;ko04916 Melanogenesis;ko04925 Aldosterone synthesis and secretion;ko04261 Adrenergic signaling in …	KOG0709-CREB/ATF family transcription factor[K]
ENSG00000006327	99.845	24.4675	2.02882	0.000645736	0.0170843	up	TNFRSF12A	TNF receptor superfamily member 12A [Source:HGNC Symbol;Acc:HGNC:18152]	GO:0016021;GO:0016020;GO:0009986;GO:0005886;GO:0001726;GO:0097191;GO:0045773;GO:0045765;GO:0007155;GO:0006931;GO:0005515;GO:0006915;GO:0007275;GO:0030154;GO:0033209;GO:0043065;GO:0001525;GO:2001238;GO:0061041	K05149-ko04060 Cytokine-cytokine receptor interaction	-
ENSG00000093009	26.1909	5.38665	2.2816	2.8e-05	0.00153291	up	CDC45	cell division cycle 45 [Source:HGNC Symbol;Acc:HGNC:1739]	GO:0006270;GO:0005515;GO:0005813;GO:0032508;GO:0005634;GO:0005737;GO:0007049;GO:0006260;GO:0003682;GO:0005654;GO:0003697;GO:0000082;GO:0000727;GO:0003688;GO:0043138;GO:0000076;GO:0000083;GO:0006267;GO:0031938;GO:1900087;GO:1902977;GO:0005656;GO:0031261;GO:0031298	K06628-ko04110 Cell cycle;ko04111 Cell cycle - yeast;ko04113 Meiosis - yeast	-
ENSG00000117643	2.78663	9.80506	-1.81501	0.000265302	0.00883458	down	MAN1C1	mannosidase alpha class 1C member 1 [Source:HGNC Symbol;Acc:HGNC:19080]	GO:0016798;GO:0008152;GO:0005794;GO:0005509;GO:0016787;GO:0046872;GO:0016020;GO:0016021;GO:0004571;GO:0000139;GO:0006486;GO:0005783;GO:0070062;GO:0030173;GO:1904381;GO:0006487;GO:0006491	K01230-ko00510 N-Glycan biosynthesis;ko00513 Various types of N-glycan biosynthesis;ko04141 Protein processing in endoplasmic reticulum	KOG2431-1, 2-alpha-mannosidase[G]
ENSG00000117394	241.456	72.9595	1.72659	0.00145043	0.0303393	up	SLC2A1	solute carrier family 2 member 1 [Source:HGNC Symbol;Acc:HGNC:11005]	GO:0055085;GO:0016021;GO:0016020;GO:0022857;GO:0005215;GO:0006810;GO:0022891;GO:0045121;GO:0031982;GO:0016324;GO:0016323;GO:0005911;GO:0005901;GO:0005886;GO:0005829;GO:0005737;GO:0005622;GO:0001939;GO:0070837;GO:0042908;GO:0042149;GO:0015758;GO:0006970;GO:0055056;GO:0042910;GO:0033300;GO:0019900;GO:0005355;GO:0042470;GO:0005515;GO:0008643;GO:0030496;GO:0042802;GO:0005887;GO:0070062;GO:0072562;GO:…	K07299-ko04066 HIF-1 signaling pathway;ko04911 Insulin secretion;ko04922 Glucagon signaling pathway;ko04920 Adipocytokine signaling pathway;ko04919 Thyroid hormone signaling pathway;ko04976 Bile secretion;ko05200 Pathways in cancer;ko05230 Central carbon metabolism in cancer;ko05211 Renal cell carcinoma;ko04931 Insulin resistance;ko05166 HTLV-I infection	KOG0569-Permease of the major facilitator superfamily[G]
ENSG00000117399	82.6629	25.0801	1.7207	0.000427531	0.0125853	up	CDC20	cell division cycle 20 [Source:HGNC Symbol;Acc:HGNC:1723]	GO:0005515;GO:0051301;GO:0016567;GO:0005737;GO:0007049;GO:0007399;GO:0030154;GO:0005856;GO:0031145;GO:0000922;GO:0005815;GO:0005829;GO:0016579;GO:0043161;GO:0051437;GO:0005654;GO:0008022;GO:0010997;GO:0097027;GO:1904668;GO:0007062;GO:0019899;GO:0051436;GO:0042787;GO:0051439;GO:0005680;GO:0005819;GO:0090129;GO:0031915;GO:0048471;GO:0043234;GO:0005813;GO:0090307;GO:0050773;GO:0040020;GO:0008284;GO:…	K03363-ko04120 Ubiquitin mediated proteolysis;ko04110 Cell cycle;ko04111 Cell cycle - yeast;ko04113 Meiosis - yeast;ko04114 Oocyte meiosis;ko05203 Viral carcinogenesis;ko05166 HTLV-I infection	KOG0305-Anaphase promoting complex, Cdc20, Cdh1, and Ama1 subunits[DO]
ENSG00000250722	49.5654	117.455	-1.2447	0.00140501	0.0297773	down	SELENOP	selenoprotein P [Source:HGNC Symbol;Acc:HGNC:10751]	GO:0005615;GO:0040007;GO:0019953;GO:0009791;GO:0007626;GO:0007420;GO:0001887;GO:0008430;GO:0005576;GO:0070062;GO:0006979;GO:0002576;GO:0031089;GO:0016021;GO:0016020	-	-
ENSG00000184916	45.723	8.28619	2.46414	8.45e-05	0.00362527	up	JAG2	jagged 2 [Source:HGNC Symbol;Acc:HGNC:6189]	GO:0016020;GO:0005887;GO:1990134;GO:0045747;GO:0042492;GO:0042475;GO:0030155;GO:0016331;GO:0009912;GO:0003016;GO:0001701;GO:0001501;GO:0005112;GO:0005515;GO:0007275;GO:0008083;GO:0005509;GO:0016021;GO:0007049;GO:0030154;GO:0007219;GO:0007154;GO:0007283;GO:0005886;GO:0030334;GO:0042127;GO:0030217;GO:0007220;GO:0045061	K06052-ko04330 Notch signaling pathway;ko05224 Breast cancer;ko01522 Endocrine resistance	KOG1217-Fibrillins and related proteins containing Ca2+-binding EGF-like domains[T]
ENSG00000182612	12.4285	1.44011	3.1094	0.000449731	0.0130928	up	TSPAN10	tetraspanin 10 [Source:HGNC Symbol;Acc:HGNC:29942]	GO:0016021;GO:0016020	-	-
ENSG00000100297	62.1284	15.0686	2.04371	0.00056455	0.0154808	up	MCM5	minichromosome maintenance complex component 5 [Source:HGNC Symbol;Acc:HGNC:6948]	GO:0006270;GO:0032508;GO:0005524;GO:0005634;GO:0003682;GO:0003678;GO:0042555;GO:0003688;GO:0051301;GO:0003677;GO:0004386;GO:0016787;GO:0005654;GO:0000166;GO:0006260;GO:0005515;GO:0016020;GO:0007049;GO:0000784;GO:0000082	K02209-ko03030 DNA replication;ko04110 Cell cycle;ko04111 Cell cycle - yeast;ko04113 Meiosis - yeast	KOG0481-DNA replication licensing factor, MCM5 component[L]
ENSG00000100290	58.2433	9.11796	2.67531	0.000182781	0.00670155	up	BIK	BCL2 interacting killer [Source:HGNC Symbol;Acc:HGNC:1051]	GO:0005740;GO:0008637;GO:0008584;GO:0007283;GO:0051400;GO:0046982;GO:0005515;GO:0006915;GO:0005739;GO:0042981;GO:0016021;GO:0016020;GO:0031966;GO:0012505;GO:0032464;GO:0090200	K18452-ko01522 Endocrine resistance	-
ENSG00000114346	38.5277	9.24822	2.05865	0.000838857	0.0205039	up	ECT2	epithelial cell transforming 2 [Source:HGNC Symbol;Acc:HGNC:3155]	GO:0005096;GO:0004871;GO:0005515;GO:0035023;GO:0005089;GO:0042803;GO:0051301;GO:0035556;GO:0005829;GO:0005634;GO:0015031;GO:0005737;GO:0006810;GO:0007049;GO:0030054;GO:0007399;GO:0030154;GO:0005856;GO:0000902;GO:0005085;GO:0005819;GO:0030496;GO:0000910;GO:0045666;GO:0005923;GO:0043547;GO:0051056;GO:0043065;GO:0043123;GO:0032154;GO:0042307;GO:0005911;GO:0032467;GO:0045859;GO:0071479;GO:0051260;GO:…	-	KOG3524-Predicted guanine nucleotide exchange factor (PEBBLE)[T]
ENSG00000125871	36.4597	8.83871	2.0444	0.00182612	0.0361263	up	MGME1	mitochondrial genome maintenance exonuclease 1 [Source:HGNC Symbol;Acc:HGNC:16205]	GO:0005739;GO:0090305;GO:0003677;GO:0016787;GO:0004518;GO:0004527;GO:0006281;GO:0006974;GO:0000002;GO:0006264;GO:0043504;GO:0008297	-	-
ENSG00000251615	1.53935	5.48982	-1.83444	0.00246055	0.0450314	down	AC104825.3	-	-	-	-
ENSG00000170454	42.6961	0.230777	7.53146	0.00137187	0.029464	up	KRT75	keratin 75 [Source:HGNC Symbol;Acc:HGNC:24431]	GO:0005622;GO:0002244;GO:0005882;GO:0005198;GO:0045095;GO:0005829;GO:0070062;GO:0031424;GO:0070268	-	-
ENSG00000256612	0.81739	7.01781	-3.10193	8.49e-05	0.00363342	down	CYP2B7P	cytochrome P450 family 2 subfamily B member 7, pseudogene [Source:HGNC Symbol;Acc:HGNC:2616]	-	-	-
ENSG00000215018	0.823467	10.2506	-3.63786	6.53e-06	0.000512303	down	COL28A1	collagen type XXVIII alpha 1 chain [Source:HGNC Symbol;Acc:HGNC:22442]	GO:0010951;GO:0004867;GO:0005604;GO:0005581;GO:0005576;GO:0007155;GO:0005578;GO:0030414;GO:0010466;GO:0005788	-	-
ENSG00000136573	2.27054	8.43664	-1.89363	1.71e-05	0.00103505	down	BLK	BLK proto-oncogene, Src family tyrosine kinase [Source:HGNC Symbol;Acc:HGNC:1057]	GO:0004715;GO:0005515;GO:0005886;GO:0004713;GO:0016310;GO:0016301;GO:0016740;GO:0006468;GO:0005524;GO:0000166;GO:0004672;GO:0016020;GO:0045087;GO:0030154;GO:0042127;GO:0050853;GO:0016477;GO:0035556;GO:0005102;GO:0038083;GO:0031234;GO:0007169;GO:0032024;GO:0018108	-	KOG0197-Tyrosine kinases[T]
ENSG00000138061	2.76407	9.62264	-1.79964	0.000535749	0.0149762	down	CYP1B1	cytochrome P450 family 1 subfamily B member 1 [Source:HGNC Symbol;Acc:HGNC:2597]	GO:0005739;GO:2000377;GO:0071603;GO:0070301;GO:0061304;GO:0061298;GO:0048514;GO:0046466;GO:0046427;GO:0045766;GO:0043542;GO:0043065;GO:0042574;GO:0042572;GO:0033629;GO:0032088;GO:0030336;GO:0030199;GO:0019369;GO:0010575;GO:0009636;GO:0009404;GO:0008631;GO:0008285;GO:0008210;GO:0007155;GO:0006809;GO:0006725;GO:0002930;GO:0001525;GO:0016712;GO:0004497;GO:0016705;GO:0005506;GO:0043231;GO:0005789;GO:…	K07410-ko00140 Steroid hormone biosynthesis;ko00380 Tryptophan metabolism;ko00980 Metabolism of xenobiotics by cytochrome P450;ko04913 Ovarian Steroidogenesis;ko05206 MicroRNAs in cancer;ko05204 Chemical carcinogenesis	KOG0156-Cytochrome P450 CYP2 subfamily[Q]
ENSG00000197892	3.03046	12.4057	-2.0334	2.25e-05	0.00127059	down	KIF13B	kinesin family member 13B [Source:HGNC Symbol;Acc:HGNC:14405]	GO:0033270;GO:0005902;GO:0005829;GO:0007165;GO:0005515;GO:0003777;GO:0005524;GO:0000166;GO:0005737;GO:0008017;GO:0005856;GO:0005874;GO:0007018;GO:0042995;GO:0072383;GO:0030424;GO:0030705;GO:0016887;GO:0005871;GO:0006605;GO:0042110;GO:0019901;GO:0071889;GO:0050770;GO:0003774	-	KOG0245-Kinesin-like protein[Z]
ENSG00000075673	2.61866	31.3009	-3.5793	8.52e-05	0.00363342	down	ATP12A	ATPase H+/K+ transporting non-gastric alpha2 subunit [Source:HGNC Symbol;Acc:HGNC:13816]	GO:1902600;GO:0006814;GO:0006813;GO:0006811;GO:0046872;GO:0016787;GO:0005524;GO:0000166;GO:0016021;GO:0016020;GO:0006810;GO:0099132;GO:0015992;GO:0019829;GO:0005886;GO:0005391;GO:0010248;GO:0034220;GO:0008900;GO:0005889;GO:0016323;GO:0055075;GO:0006885	K01544-ko00190 Oxidative phosphorylation	KOG0203-Na+/K+ ATPase, alpha subunit[P]
ENSG00000162757	15.3417	3.24435	2.24146	0.00192192	0.0376196	up	C1orf74	chromosome 1 open reading frame 74 [Source:HGNC Symbol;Acc:HGNC:26319]	-	-	-
ENSG00000120885	97.261	287.577	-1.56401	9.37e-06	0.000657989	down	CLU	clusterin [Source:HGNC Symbol;Acc:HGNC:2095]	GO:0005615;GO:1902004;GO:1901216;GO:0005576;GO:0005515;GO:0005739;GO:0005829;GO:0043231;GO:0005783;GO:0016020;GO:0005737;GO:0005634;GO:0006915;GO:0048471;GO:0031410;GO:0002376;GO:0045087;GO:0031966;GO:0070062;GO:0031012;GO:0072562;GO:0009615;GO:0050821;GO:0031625;GO:0051092;GO:0006958;GO:0002576;GO:0009986;GO:0019730;GO:0043234;GO:0031093;GO:0006629;GO:0061077;GO:0005794;GO:1902230;GO:0051087;GO:…	K17252-ko04610 Complement and coagulation cascades	-
ENSG00000145934	22.069	2.6861	3.03844	1.7e-05	0.00102988	up	TENM2	teneurin transmembrane protein 2 [Source:HGNC Symbol;Acc:HGNC:29943]	GO:0005886;GO:0042803;GO:0005102;GO:0005887;GO:0005794;GO:0007155;GO:0006355;GO:0006351;GO:0007165;GO:0005509;GO:0005783;GO:0016021;GO:0016020;GO:0005634;GO:0030054;GO:0045202;GO:0045211;GO:0030425;GO:0042995;GO:0097264;GO:0000122;GO:0030175;GO:0030426;GO:0043197;GO:0043005;GO:0046982;GO:0016605;GO:0051491;GO:0016337	-	KOG1225-Teneurin-1 and related extracellular matrix proteins, contain EGF-like repeats[TW]
ENSG00000182118	33.1366	5.03687	2.71783	1.76e-06	0.00018971	up	FAM89A	family with sequence similarity 89 member A [Source:HGNC Symbol;Acc:HGNC:25057]	-	-	-
ENSG00000133710	92.2769	1396.41	-3.91961	2.3e-06	0.000228211	down	SPINK5	serine peptidase inhibitor, Kazal type 5 [Source:HGNC Symbol;Acc:HGNC:15464]	GO:0005576;GO:0005829;GO:0005789;GO:0005783;GO:0043231;GO:0005737;GO:0048471;GO:0030414;GO:0010466;GO:0070062;GO:0005938;GO:0004867;GO:0030855;GO:0016525;GO:0070268;GO:0050777;GO:0030198;GO:0045580;GO:0009913;GO:0035315;GO:0097209;GO:0042640;GO:1902572;GO:1900004;GO:0045861;GO:0030155;GO:0002787	-	-
ENSG00000143556	1548.44	9.23689	7.38919	3.69e-13	2.96e-10	up	S100A7	S100 calcium binding protein A7 [Source:HGNC Symbol;Acc:HGNC:10497]	GO:0061844;GO:0005576;GO:0005515;GO:0008270;GO:0005829;GO:0005509;GO:0005783;GO:0046872;GO:0005737;GO:0005634;GO:0045087;GO:0005925;GO:0046914;GO:0070062;GO:0032496;GO:0043312;GO:0070374;GO:0019730;GO:0001525;GO:0035578;GO:0030216;GO:0050829;GO:0008544;GO:0090026;GO:0000302;GO:0050786;GO:0010820;GO:0051238;GO:0071624	-	-
ENSG00000074370	19.285	99.2263	-2.36324	3.7e-05	0.00189689	down	ATP2A3	ATPase sarcoplasmic/endoplasmic reticulum Ca2+ transporting 3 [Source:HGNC Symbol;Acc:HGNC:813]	GO:0006811;GO:0005783;GO:0046872;GO:0016787;GO:0005789;GO:0005524;GO:0000166;GO:0016021;GO:0016020;GO:0005634;GO:0006810;GO:0005388;GO:0006816;GO:0070588;GO:0099132;GO:0033017;GO:0034220;GO:0016529;GO:0031965;GO:1903779;GO:0031095	K05853-ko04020 Calcium signaling pathway;ko04022 cGMP - PKG signaling pathway;ko04972 Pancreatic secretion;ko05010 Alzheimer's disease	KOG0202-Ca2+ transporting ATPase[P]
ENSG00000006016	3.83697	14.5337	-1.92136	0.00033338	0.0105473	down	CRLF1	cytokine receptor like factor 1 [Source:HGNC Symbol;Acc:HGNC:2364]	GO:0005615;GO:2000672;GO:0001657;GO:0005576;GO:0005515;GO:0008284;GO:0046982;GO:0004872;GO:0005125;GO:0043524;GO:0005127;GO:0019955;GO:0097058;GO:0042531	-	-
ENSG00000164265	0.258479	100.974	-8.60972	4.73e-06	0.000393014	down	SCGB3A2	secretoglobin family 3A member 2 [Source:HGNC Symbol;Acc:HGNC:18391]	GO:0005576;GO:0006898;GO:0071682	-	-
ENSG00000007944	12.4698	35.2923	-1.50091	8.53e-05	0.00363342	down	MYLIP	myosin regulatory light chain interacting protein [Source:HGNC Symbol;Acc:HGNC:21155]	GO:0045732;GO:0042787;GO:0042632;GO:0032803;GO:0031648;GO:0010989;GO:0061630;GO:0004842;GO:0032802;GO:0019898;GO:0008092;GO:0005515;GO:0005886;GO:0016567;GO:0016740;GO:0046872;GO:0008270;GO:0016020;GO:0005737;GO:0007399;GO:0005829;GO:0005622;GO:0000209;GO:0006928;GO:0005856	-	-
ENSG00000171017	19.9606	2.51532	2.98834	0.00282746	0.0498346	up	LRRC8E	leucine rich repeat containing 8 family member E [Source:HGNC Symbol;Acc:HGNC:26272]	GO:0005225;GO:0005515;GO:0005886;GO:0006811;GO:0005789;GO:0005783;GO:0016021;GO:0016020;GO:0005737;GO:0006810;GO:0005887;GO:0007165;GO:0055085;GO:0044070;GO:0034702;GO:0098656	-	KOG0619-FOG: Leucine rich repeat[R]
ENSG00000167183	4.78242	21.8334	-2.19072	0.00023784	0.00812231	down	PRR15L	proline rich 15 like [Source:HGNC Symbol;Acc:HGNC:28149]	-	-	-
ENSG00000141404	2.07357	7.02872	-1.76115	0.000107957	0.00440536	down	GNAL	G protein subunit alpha L [Source:HGNC Symbol;Acc:HGNC:4388]	GO:0031683;GO:0019001;GO:0003924;GO:0007165;GO:0004871;GO:0005525;GO:0007186;GO:0000166;GO:0046872;GO:0005886;GO:0070062;GO:0007608;GO:0001664;GO:0007193;GO:0005834;GO:0007189;GO:0007190;GO:0007191	K04633-ko04020 Calcium signaling pathway;ko04728 Dopaminergic synapse;ko04740 Olfactory transduction;ko05012 Parkinson's disease;ko05146 Amoebiasis;ko05142 Chagas disease (American trypanosomiasis)	KOG0099-G protein subunit Galphas, small G protein superfamily[T]
ENSG00000127324	0.455901	12.8095	-4.81235	3.81e-07	5.25e-05	down	TSPAN8	tetraspanin 8 [Source:HGNC Symbol;Acc:HGNC:11855]	GO:0009986;GO:0030195;GO:0010468;GO:0007283;GO:0005178;GO:0016021;GO:0016020;GO:0005887;GO:0070062;GO:0007166	-	KOG3882-Tetraspanin family integral membrane protein[R]
ENSG00000145879	7.57992	266.78	-5.13733	5.72e-07	7.25e-05	down	SPINK7	serine peptidase inhibitor, Kazal type 7 (putative) [Source:HGNC Symbol;Acc:HGNC:24643]	GO:0005576;GO:0005515;GO:0005615;GO:0030414;GO:0010466;GO:0004867;GO:0060046;GO:1900004;GO:0001669	-	KOG3649-FOG: Kazal-type serine protease inhibitor domain[R]
ENSG00000170345	50.7323	283.854	-2.48417	6.52e-05	0.00297326	down	FOS	Fos proto-oncogene, AP-1 transcription factor subunit [Source:HGNC Symbol;Acc:HGNC:3796]	GO:0043005;GO:0035976;GO:0016020;GO:0005667;GO:0005634;GO:1902895;GO:0071277;GO:0051591;GO:0051412;GO:0045944;GO:0045672;GO:0042493;GO:0035994;GO:0035914;GO:0035902;GO:0034097;GO:0032870;GO:0032570;GO:0032496;GO:0031668;GO:0030431;GO:0014070;GO:0009636;GO:0009629;GO:0009612;GO:0009416;GO:0009409;GO:0007568;GO:0007565;GO:0007399;GO:0006366;GO:0006355;GO:0001661;GO:0046982;GO:0043565;GO:0008134;GO:…	K04379-ko04010 MAPK signaling pathway;ko04668 TNF signaling pathway;ko04024 cAMP signaling pathway;ko04210 Apoptosis;ko04620 Toll-like receptor signaling pathway;ko04660 T cell receptor signaling pathway;ko04662 B cell receptor signaling pathway;ko04915 Estrogen signaling pathway;ko04917 Prolactin signaling pathway;ko04921 Oxytocin signaling pathway;ko04725 Cholinergic synapse;ko04728 Dopaminergi…	KOG1414-Transcriptional activator FOSB/c-Fos and related bZIP transcription factors[K]
ENSG00000211933	87.027	8.47679	3.35987	0.0012658	0.0278823	up	IGHV6-1	immunoglobulin heavy variable 6-1 [Source:HGNC Symbol;Acc:HGNC:5662]	GO:0005576;GO:0005886;GO:0016020;GO:0002376;GO:0003823;GO:0002250;GO:0034987;GO:0006910;GO:0006911;GO:0006958;GO:0042742;GO:0045087;GO:0050853;GO:0050871;GO:0009897;GO:0042571;GO:0072562	-	-
ENSG00000119922	48.1647	5.27878	3.1897	0.000433996	0.0127426	up	IFIT2	interferon induced protein with tetratricopeptide repeats 2 [Source:HGNC Symbol;Acc:HGNC:5409]	GO:0005515;GO:0005783;GO:0005737;GO:0003723;GO:0006915;GO:0002376;GO:0045087;GO:0051607;GO:0035457;GO:0005829;GO:0009615;GO:0043065;GO:0032091;GO:0060337;GO:0008637	-	KOG1124-FOG: TPR repeat[R]
